# Supplementary material for: A Phylogenetic Study of the ANT Family Points to a preANT Gene as the Ancestor of Basal and euANT Transcription Factors in Land Plants
Source: Front Plant Sci. 2019 Jan 29;10:17. doi: 10.3389/fpls.2019.00017 (PMC6361745; doi:10.3389/fpls.2019.00017)
Supplement: Supplementary file 3 [file Table_3.xlsx]

## Sheet: Sheet1
Supplementary Table 3. Cis-regulatory elements found in a 2500bp region upstream of ATG of ANT genes.
Multi promoter analysis with PlantPAN 2.0 of 2500bp upstream of ATG of ANT genes							CIS element counts per family and gene							CIS element counts per family and gene
							euANT							basalANT
Sequence ID	Posistion	Strand	Binding sequence	TF family			gene	WOX	MYB	ERF	ARR-B	ARF		gene	WOX	MYB	ERF	ARR-B	ARF
AT2G41710|Athaliana	578	+	gtGGATCtga	ARR-B			Os11g19060|Osativa	3	1	1	2	2		Os12g03290|Osativa	4	3	0	3	6
AT2G41710|Athaliana	958	+	atGGATCcgt	ARR-B			Os01g67410|Osativa	1	2	0	8	2		Os11g03540|Osativa	6	1	0	0	3
AT2G41710|Athaliana	958	-	atgGATCCgt	ARR-B			Os04g42570|Osativa	2	1	2	2	1		Os05g45954|Osativa	3	4	2	2	5
AT2G41710|Athaliana	1825	+	taGGATCcag	ARR-B			Os02g40070|Osativa	4	3	1	4	0		Os06g05340|Osativa	1	2	0	6	1
AT2G41710|Athaliana	1825	-	tagGATCCag	ARR-B			Os04g55970|Osativa	1	3	0	2	4		AT1G79700|Athaliana	1	2	0	2	3
AT2G41710|Athaliana	256	+	gaAGATCtca	ARR-B			Os06g44750|Osativa	1	7	1	4	3		AT1G16060|Athaliana	2	3	1	2	5
AT2G41710|Athaliana	256	-	gaaGATCTca	ARR-B			Os03g07940|Osativa	1	3	2	5	4		AT2G41710|Athaliana	4	2	0	7	2
AT2G41710|Athaliana	485	+	gTGATTgc	WOX			Os03g56050|Osativa	10	5	0	3	2		AT3G54320|Athaliana	1	3	0	3	1
AT2G41710|Athaliana	1883	-	ccAATCAt	WOX			Os07g03250|Osativa	4	2	3	1	2		scaffold00019.64|Atrichopoda	1	0	1	1	5
AT2G41710|Athaliana	1579	-	tgtTGGTTat	MYB			AT5G17430|Athaliana	1	1	0	2	6		scaffold00101.2|Atrichopoda	4	2	0	3	1
AT2G41710|Athaliana	2307	-	gCCGTTgttt	MYB			AT3G20840|Athaliana	7	2	0	2	4		scaffold00202.3|Atrichopoda	3	1	1	3	9
AT2G41710|Athaliana	1288	+	TGTCTc	ARF			AT1G51190|Athaliana	5	1	0	2	0		Pp3c6_21840|Ppatens	4	3	0	0	7
AT2G41710|Athaliana	1560	+	TGTCTc	ARF			AT5G10510|Athaliana	4	3	0	6	3		Mapoly0009s0013|Mpolymorpha	0	1	0	0	2
AT2G41710|Athaliana	56	-	gcATTAA	WOX			AT5G65510|Athaliana	2	3	0	2	5
AT2G41710|Athaliana	754	+	TTAATgc	WOX			AT5G57390|Athaliana	1	1	0	4	6
AT4G37750|Athaliana	1995	-	tcaTATCTta	ARR-B			AT1G72570|Athaliana	1	0	0	1	6
AT4G37750|Athaliana	1284	+	atGTCGGgtc	ARF			AT4G37750|Athaliana	2	1	0	1	5
AT4G37750|Athaliana	1392	+	ttGTCGGatt	ARF			scaffold00066.6|Atrichopoda	3	1	0	2	0
AT4G37750|Athaliana	1283	-	taTGTCGgg	ARF			scaffold00019.292|Atrichopoda	2	0	0	2	1
AT4G37750|Athaliana	1391	-	ttTGTCGga	ARF			scaffold00024.229|Atrichopoda	1	2	0	0	3
AT4G37750|Athaliana	1825	+	aTGATTgc	WOX			scaffold00065.42|Atrichopoda	7	0	0	3	5
AT4G37750|Athaliana	2403	+	aTGATTgg	WOX			Pp3c15_24790|Ppatens	1	4	1	3	2
AT4G37750|Athaliana	851	+	aGTTAGttct	MYB			Pp3c15_24980|Ppatens	2	4	1	5	6
AT4G37750|Athaliana	1150	-	gAGACA	ARF			Pp3c9_25570|Ppatens	4	1	3	2	3
AT1G79700|Athaliana	288	+	agAGATCttt	ARR-B			Pp3c9_25400|Ppatens	2	3	2	0	5
AT1G79700|Athaliana	288	-	agaGATCTtt	ARR-B			Mapoly0008s0071|Mpolymorpha	1	3	2	4	6
AT1G79700|Athaliana	2003	+	ttCGACAaa	ARF
AT1G79700|Athaliana	1538	-	acAATCAc	WOX
AT1G79700|Athaliana	744	+	caAACCAacg	MYB
AT1G79700|Athaliana	623	-	gaaaCTAACt	MYB
AT1G79700|Athaliana	2432	+	TGTCTc	ARF
AT1G79700|Athaliana	2465	+	TGTCTc	ARF
AT1G51190|Athaliana	1479	-	tcaTATCTtg	ARR-B
AT1G51190|Athaliana	2302	-	ctaGATCTct	ARR-B
AT1G51190|Athaliana	614	-	tcAATCAt	WOX
AT1G51190|Athaliana	346	+	tgaTAGGTac	MYB
AT1G51190|Athaliana	1155	+	TTAATcg	WOX
AT1G51190|Athaliana	1678	+	TTAATcg	WOX
AT1G51190|Athaliana	1684	-	gcATTAA	WOX
AT1G51190|Athaliana	2033	+	TTAATgg	WOX
AT1G72570|Athaliana	2193	-	aaaGATCCga	ARR-B
AT1G72570|Athaliana	129	-	aacCCGACaa	ARF
AT1G72570|Athaliana	131	+	ccCGACAaa	ARF
AT1G72570|Athaliana	1388	-	atTGTCGat	ARF
AT1G72570|Athaliana	2306	+	taCGACAaa	ARF
AT1G72570|Athaliana	1872	-	gcAATCAa	WOX
AT1G72570|Athaliana	1299	-	gAGACA	ARF
AT1G72570|Athaliana	2334	+	TGTCTc	ARF
AT1G16060|Athaliana	1413	-	gcaTATCTta	ARR-B
AT1G16060|Athaliana	2139	+	gcGGATCtaa	ARR-B
AT1G16060|Athaliana	640	-	cagCCGACaa	ARF
AT1G16060|Athaliana	840	+	ctGTCGGatg	ARF
AT1G16060|Athaliana	642	+	gcCGACAac	ARF
AT1G16060|Athaliana	839	-	tcTGTCGga	ARF
AT1G16060|Athaliana	446	+	tTGATTgc	WOX
AT1G16060|Athaliana	649	-	aCCGTTagaa	MYB
AT1G16060|Athaliana	2369	+	ataaAACGGa	MYB
AT1G16060|Athaliana	664	-	aaaaCTAACa	MYB
AT1G16060|Athaliana	462	-	gAGACA	ARF
AT1G16060|Athaliana	641	+	AGCCGac	ERF
AT1G16060|Athaliana	36	+	TTAATcc	WOX
AT3G54320|Athaliana	1794	+	gaAGATAcgt	ARR-B
AT3G54320|Athaliana	468	+	ctGGATCcga	ARR-B
AT3G54320|Athaliana	468	-	ctgGATCCga	ARR-B
AT3G54320|Athaliana	1742	+	ttCGACAat	ARF
AT3G54320|Athaliana	1978	-	tcAATCAa	WOX
AT3G54320|Athaliana	281	-	taACCTAgca	MYB
AT3G54320|Athaliana	89	+	caAACCAcct	MYB
AT3G54320|Athaliana	475	+	cgAACCAacg	MYB
AT3G20840|Athaliana	162	+	gaAGATCtgg	ARR-B
AT3G20840|Athaliana	162	-	gaaGATCTgg	ARR-B
AT3G20840|Athaliana	1997	-	aatCCGACaa	ARF
AT3G20840|Athaliana	391	-	ataTCGACat	ARF
AT3G20840|Athaliana	1999	+	tcCGACAaa	ARF
AT3G20840|Athaliana	2400	+	cTGATTgg	WOX
AT3G20840|Athaliana	1627	+	aggaAACGGa	MYB
AT3G20840|Athaliana	726	-	taaaCTAACa	MYB
AT3G20840|Athaliana	637	-	gAGACA	ARF
AT3G20840|Athaliana	452	+	TTAATgg	WOX
AT3G20840|Athaliana	474	-	cgATTAA	WOX
AT3G20840|Athaliana	840	+	TTAATgc	WOX
AT3G20840|Athaliana	977	+	TTAATgc	WOX
AT3G20840|Athaliana	1186	-	gcATTAA	WOX
AT3G20840|Athaliana	1713	+	TTAATcg	WOX
AT5G17430|Athaliana	1240	-	tcaTATCTta	ARR-B
AT5G17430|Athaliana	1011	-	ctaGATCTac	ARR-B
AT5G17430|Athaliana	235	-	cttCCGACta	ARF
AT5G17430|Athaliana	2026	+	atCGACAac	ARF
AT5G17430|Athaliana	2324	-	taTGTCGcc	ARF
AT5G17430|Athaliana	821	-	gCCGTTcttt	MYB
AT5G17430|Athaliana	1993	+	TGTCTc	ARF
AT5G17430|Athaliana	2002	-	gAGACA	ARF
AT5G17430|Athaliana	2126	-	gAGACA	ARF
AT5G17430|Athaliana	55	-	cgATTAA	WOX
AT5G57390|Athaliana	2113	+	atAGATCtat	ARR-B
AT5G57390|Athaliana	2113	-	ataGATCTat	ARR-B
AT5G57390|Athaliana	2429	+	agAGATCttt	ARR-B
AT5G57390|Athaliana	2429	-	agaGATCTtt	ARR-B
AT5G57390|Athaliana	535	+	ttGTCGGtca	ARF
AT5G57390|Athaliana	2140	-	catCCGACat	ARF
AT5G57390|Athaliana	534	-	atTGTCGgt	ARF
AT5G57390|Athaliana	1445	+	atCGACAac	ARF
AT5G57390|Athaliana	2142	+	tcCGACAtt	ARF
AT5G57390|Athaliana	805	+	aagaAACGGa	MYB
AT5G57390|Athaliana	1115	+	TGTCTc	ARF
AT5G57390|Athaliana	715	-	gcATTAA	WOX
AT5G10510|Athaliana	1207	+	taAGATAagc	ARR-B
AT5G10510|Athaliana	1747	+	taAGATAcgt	ARR-B
AT5G10510|Athaliana	416	+	ccAGATCttt	ARR-B
AT5G10510|Athaliana	416	-	ccaGATCTtt	ARR-B
AT5G10510|Athaliana	2135	+	agAGATCttc	ARR-B
AT5G10510|Athaliana	2135	-	agaGATCTtc	ARR-B
AT5G10510|Athaliana	1698	+	gtGTCGGaca	ARF
AT5G10510|Athaliana	1178	-	ttTGTCGaa	ARF
AT5G10510|Athaliana	1697	-	tgTGTCGga	ARF
AT5G10510|Athaliana	720	-	acAATCAt	WOX
AT5G10510|Athaliana	1250	-	acAATCAt	WOX
AT5G10510|Athaliana	1411	+	aTGATTgg	WOX
AT5G10510|Athaliana	595	+	agtTAGGTcg	MYB
AT5G10510|Athaliana	1123	-	aCCGTTactc	MYB
AT5G10510|Athaliana	1329	+	aacaAACGGt	MYB
AT5G10510|Athaliana	929	+	TTAATcg	WOX
AT5G65510|Athaliana	39	+	gaAGATCtca	ARR-B
AT5G65510|Athaliana	39	-	gaaGATCTca	ARR-B
AT5G65510|Athaliana	2088	+	cgGTCGAcac	ARF
AT5G65510|Athaliana	2088	-	cggTCGACac	ARF
AT5G65510|Athaliana	301	-	ctTGTCGat	ARF
AT5G65510|Athaliana	522	+	agaTAGGTat	MYB
AT5G65510|Athaliana	1344	+	ggatAACGGa	MYB
AT5G65510|Athaliana	1776	+	tGTTAGttta	MYB
AT5G65510|Athaliana	2132	+	TGTCTc	ARF
AT5G65510|Athaliana	2384	+	TGTCTc	ARF
AT5G65510|Athaliana	1266	-	cgATTAA	WOX
AT5G65510|Athaliana	1376	+	TTAATcc	WOX
evm_27.TU.AmTr_v1.0_scaffold00065.42|Atrichopoda	2095	-	acaGATCCct	ARR-B
evm_27.TU.AmTr_v1.0_scaffold00065.42|Atrichopoda	2341	+	tgAGATCttc	ARR-B
evm_27.TU.AmTr_v1.0_scaffold00065.42|Atrichopoda	2341	-	tgaGATCTtc	ARR-B
evm_27.TU.AmTr_v1.0_scaffold00065.42|Atrichopoda	624	+	tTGATTga	WOX
evm_27.TU.AmTr_v1.0_scaffold00065.42|Atrichopoda	716	+	aTGATTgc	WOX
evm_27.TU.AmTr_v1.0_scaffold00065.42|Atrichopoda	1593	+	tTGATTgt	WOX
evm_27.TU.AmTr_v1.0_scaffold00065.42|Atrichopoda	2441	+	aTGATTga	WOX
evm_27.TU.AmTr_v1.0_scaffold00065.42|Atrichopoda	17	-	gAGACA	ARF
evm_27.TU.AmTr_v1.0_scaffold00065.42|Atrichopoda	309	-	gAGACA	ARF
evm_27.TU.AmTr_v1.0_scaffold00065.42|Atrichopoda	1343	-	gAGACA	ARF
evm_27.TU.AmTr_v1.0_scaffold00065.42|Atrichopoda	1819	+	TGTCTc	ARF
evm_27.TU.AmTr_v1.0_scaffold00065.42|Atrichopoda	2253	-	gAGACA	ARF
evm_27.TU.AmTr_v1.0_scaffold00065.42|Atrichopoda	210	-	ggATTAA	WOX
evm_27.TU.AmTr_v1.0_scaffold00065.42|Atrichopoda	509	-	ccATTAA	WOX
evm_27.TU.AmTr_v1.0_scaffold00065.42|Atrichopoda	612	-	ccATTAA	WOX
evm_27.TU.AmTr_v1.0_scaffold00101.2|Atrichopoda	2197	+	aaAGATAaga	ARR-B
evm_27.TU.AmTr_v1.0_scaffold00101.2|Atrichopoda	686	+	gtAGATCtat	ARR-B
evm_27.TU.AmTr_v1.0_scaffold00101.2|Atrichopoda	686	-	gtaGATCTat	ARR-B
evm_27.TU.AmTr_v1.0_scaffold00101.2|Atrichopoda	765	-	acAATCAa	WOX
evm_27.TU.AmTr_v1.0_scaffold00101.2|Atrichopoda	1098	+	tTGATTgt	WOX
evm_27.TU.AmTr_v1.0_scaffold00101.2|Atrichopoda	129	-	ctACCTAact	MYB
evm_27.TU.AmTr_v1.0_scaffold00101.2|Atrichopoda	130	+	tACCTAacta	MYB
evm_27.TU.AmTr_v1.0_scaffold00101.2|Atrichopoda	1463	-	gAGACA	ARF
evm_27.TU.AmTr_v1.0_scaffold00101.2|Atrichopoda	1588	+	TTAATcc	WOX
evm_27.TU.AmTr_v1.0_scaffold00101.2|Atrichopoda	2043	+	TTAATgc	WOX
evm_27.TU.AmTr_v1.0_scaffold00024.229|Atrichopoda	637	+	caGTCGAcac	ARF
evm_27.TU.AmTr_v1.0_scaffold00024.229|Atrichopoda	637	-	cagTCGACac	ARF
evm_27.TU.AmTr_v1.0_scaffold00024.229|Atrichopoda	529	-	cgtTGGTTtg	MYB
evm_27.TU.AmTr_v1.0_scaffold00024.229|Atrichopoda	362	+	ctctAACGGc	MYB
evm_27.TU.AmTr_v1.0_scaffold00024.229|Atrichopoda	383	-	gAGACA	ARF
evm_27.TU.AmTr_v1.0_scaffold00024.229|Atrichopoda	2195	+	TTAATgg	WOX
evm_27.TU.AmTr_v1.0_scaffold00066.6|Atrichopoda	1874	+	atAGATCtac	ARR-B
evm_27.TU.AmTr_v1.0_scaffold00066.6|Atrichopoda	1874	-	ataGATCTac	ARR-B
evm_27.TU.AmTr_v1.0_scaffold00066.6|Atrichopoda	428	+	aTGATTgt	WOX
evm_27.TU.AmTr_v1.0_scaffold00066.6|Atrichopoda	1217	+	gTGATTga	WOX
evm_27.TU.AmTr_v1.0_scaffold00066.6|Atrichopoda	1125	+	agaTAGGTgg	MYB
evm_27.TU.AmTr_v1.0_scaffold00066.6|Atrichopoda	1098	-	ggATTAA	WOX
evm_27.TU.AmTr_v1.0_scaffold00202.3|Atrichopoda	1351	-	ttaGATCCga	ARR-B
evm_27.TU.AmTr_v1.0_scaffold00202.3|Atrichopoda	912	+	atAGATCtac	ARR-B
evm_27.TU.AmTr_v1.0_scaffold00202.3|Atrichopoda	912	-	ataGATCTac	ARR-B
evm_27.TU.AmTr_v1.0_scaffold00202.3|Atrichopoda	524	+	ttGTCGGcct	ARF
evm_27.TU.AmTr_v1.0_scaffold00202.3|Atrichopoda	1279	+	gtGTCGGtca	ARF
evm_27.TU.AmTr_v1.0_scaffold00202.3|Atrichopoda	523	-	ttTGTCGgc	ARF
evm_27.TU.AmTr_v1.0_scaffold00202.3|Atrichopoda	1278	-	agTGTCGgt	ARF
evm_27.TU.AmTr_v1.0_scaffold00202.3|Atrichopoda	88	-	acAATCAa	WOX
evm_27.TU.AmTr_v1.0_scaffold00202.3|Atrichopoda	729	-	acAATCAa	WOX
evm_27.TU.AmTr_v1.0_scaffold00202.3|Atrichopoda	1048	+	tTGATTgt	WOX
evm_27.TU.AmTr_v1.0_scaffold00202.3|Atrichopoda	2428	-	aggTGGTTtg	MYB
evm_27.TU.AmTr_v1.0_scaffold00202.3|Atrichopoda	1872	+	TGTCTc	ARF
evm_27.TU.AmTr_v1.0_scaffold00202.3|Atrichopoda	1957	+	TGTCTc	ARF
evm_27.TU.AmTr_v1.0_scaffold00202.3|Atrichopoda	2046	+	TGTCTc	ARF
evm_27.TU.AmTr_v1.0_scaffold00202.3|Atrichopoda	2219	+	TGTCTc	ARF
evm_27.TU.AmTr_v1.0_scaffold00202.3|Atrichopoda	2229	+	TGTCTc	ARF
evm_27.TU.AmTr_v1.0_scaffold00202.3|Atrichopoda	1837	-	tgCGGCT	ERF
evm_27.TU.AmTr_v1.0_scaffold00019.292|Atrichopoda	541	-	tcaGATCCat	ARR-B
evm_27.TU.AmTr_v1.0_scaffold00019.292|Atrichopoda	2230	-	tcaGATCCat	ARR-B
evm_27.TU.AmTr_v1.0_scaffold00019.292|Atrichopoda	124	-	acAATCAa	WOX
evm_27.TU.AmTr_v1.0_scaffold00019.292|Atrichopoda	2123	+	TGTCTc	ARF
evm_27.TU.AmTr_v1.0_scaffold00019.292|Atrichopoda	1521	+	TTAATgc	WOX
evm_27.TU.AmTr_v1.0_scaffold00019.64|Atrichopoda	2143	-	tcaTATCTtt	ARR-B
evm_27.TU.AmTr_v1.0_scaffold00019.64|Atrichopoda	1888	+	gaCGACAag	ARF
evm_27.TU.AmTr_v1.0_scaffold00019.64|Atrichopoda	1905	+	gaCGACAag	ARF
evm_27.TU.AmTr_v1.0_scaffold00019.64|Atrichopoda	1306	+	TGTCTc	ARF
evm_27.TU.AmTr_v1.0_scaffold00019.64|Atrichopoda	1328	+	TGTCTc	ARF
evm_27.TU.AmTr_v1.0_scaffold00019.64|Atrichopoda	1913	-	gAGACA	ARF
evm_27.TU.AmTr_v1.0_scaffold00019.64|Atrichopoda	1989	+	AGCCGtc	ERF
evm_27.TU.AmTr_v1.0_scaffold00019.64|Atrichopoda	728	-	ccATTAA	WOX
Mapoly0009s0013|Mpolymorpha	2485	-	cttCCGACat	ARF
Mapoly0009s0013|Mpolymorpha	2487	+	tcCGACAtg	ARF
Mapoly0009s0013|Mpolymorpha	585	+	cagtAACGGg	MYB
Mapoly0008s0071|Mpolymorpha	665	+	aaAGATAgga	ARR-B
Mapoly0008s0071|Mpolymorpha	344	+	ccGGATCtgc	ARR-B
Mapoly0008s0071|Mpolymorpha	1665	+	gaAGATCttt	ARR-B
Mapoly0008s0071|Mpolymorpha	1665	-	gaaGATCTtt	ARR-B
Mapoly0008s0071|Mpolymorpha	600	-	agaCCGACag	ARF
Mapoly0008s0071|Mpolymorpha	880	+	ctGTCGGact	ARF
Mapoly0008s0071|Mpolymorpha	602	+	acCGACAgc	ARF
Mapoly0008s0071|Mpolymorpha	656	+	agCGACAga	ARF
Mapoly0008s0071|Mpolymorpha	879	-	gcTGTCGga	ARF
Mapoly0008s0071|Mpolymorpha	1007	-	tcAATCAa	WOX
Mapoly0008s0071|Mpolymorpha	2491	+	agaTAGGTcg	MYB
Mapoly0008s0071|Mpolymorpha	1424	-	tgtTGGTTga	MYB
Mapoly0008s0071|Mpolymorpha	1424	+	tgtTGGTTga	MYB
Mapoly0008s0071|Mpolymorpha	418	+	TGTCTc	ARF
Mapoly0008s0071|Mpolymorpha	937	+	AGCCGgc	ERF
Mapoly0008s0071|Mpolymorpha	1957	+	AGCCGca	ERF
Pp3c9_25400|Ppatens	1001	+	gtGTCGGacg	ARF
Pp3c9_25400|Ppatens	1068	+	tcGTCGActc	ARF
Pp3c9_25400|Ppatens	1068	-	tcgTCGACtc	ARF
Pp3c9_25400|Ppatens	1000	-	tgTGTCGga	ARF
Pp3c9_25400|Ppatens	1748	+	gaCGACAac	ARF
Pp3c9_25400|Ppatens	1470	-	gcAATCAa	WOX
Pp3c9_25400|Ppatens	1711	+	aTGATTga	WOX
Pp3c9_25400|Ppatens	136	-	ggaTGGTTga	MYB
Pp3c9_25400|Ppatens	724	-	tgaTGGTTga	MYB
Pp3c9_25400|Ppatens	1048	-	aCCGTTatgt	MYB
Pp3c9_25400|Ppatens	1504	+	AGCCGtc	ERF
Pp3c9_25400|Ppatens	1822	-	cgCGGCT	ERF
Pp3c9_25570|Ppatens	1379	+	aaAGATCttt	ARR-B
Pp3c9_25570|Ppatens	1379	-	aaaGATCTtt	ARR-B
Pp3c9_25570|Ppatens	1522	+	atGTCGGcca	ARF
Pp3c9_25570|Ppatens	1521	-	aaTGTCGgc	ARF
Pp3c9_25570|Ppatens	695	-	tcAATCAa	WOX
Pp3c9_25570|Ppatens	2346	-	gcAATCAc	WOX
Pp3c9_25570|Ppatens	469	-	aggTGGTTtc	MYB
Pp3c9_25570|Ppatens	107	-	gAGACA	ARF
Pp3c9_25570|Ppatens	1236	+	AGCCGgc	ERF
Pp3c9_25570|Ppatens	1237	-	gcCGGCT	ERF
Pp3c9_25570|Ppatens	1705	-	ggCGGCT	ERF
Pp3c9_25570|Ppatens	1259	-	ccATTAA	WOX
Pp3c9_25570|Ppatens	1714	+	TTAATgg	WOX
Pp3c15_24790|Ppatens	2132	+	aaGGATCtgg	ARR-B
Pp3c15_24790|Ppatens	956	+	ccAGATCttg	ARR-B
Pp3c15_24790|Ppatens	956	-	ccaGATCTtg	ARR-B
Pp3c15_24790|Ppatens	1657	-	ttTGTCGag	ARF
Pp3c15_24790|Ppatens	1410	+	agAACCAccg	MYB
Pp3c15_24790|Ppatens	2266	+	ttAACCAact	MYB
Pp3c15_24790|Ppatens	1537	-	tCCGTTgagt	MYB
Pp3c15_24790|Ppatens	1740	-	aCCGTTatga	MYB
Pp3c15_24790|Ppatens	410	-	gAGACA	ARF
Pp3c15_24790|Ppatens	1785	-	tgCGGCT	ERF
Pp3c15_24790|Ppatens	667	+	TTAATcg	WOX
Pp3c15_24980|Ppatens	333	+	aaAGATAtga	ARR-B
Pp3c15_24980|Ppatens	349	+	ctGGATCcga	ARR-B
Pp3c15_24980|Ppatens	349	-	ctgGATCCga	ARR-B
Pp3c15_24980|Ppatens	2160	+	caAGATCttc	ARR-B
Pp3c15_24980|Ppatens	2160	-	caaGATCTtc	ARR-B
Pp3c15_24980|Ppatens	510	-	agaCCGACac	ARF
Pp3c15_24980|Ppatens	1417	+	tcGTCGGaac	ARF
Pp3c15_24980|Ppatens	299	-	ttTGTCGca	ARF
Pp3c15_24980|Ppatens	512	+	acCGACAcg	ARF
Pp3c15_24980|Ppatens	989	+	agCGACAgt	ARF
Pp3c15_24980|Ppatens	870	+	tTGATTgc	WOX
Pp3c15_24980|Ppatens	1879	+	cTGATTga	WOX
Pp3c15_24980|Ppatens	1047	+	agcTAGGTtg	MYB
Pp3c15_24980|Ppatens	7	-	cgaaCTAACc	MYB
Pp3c15_24980|Ppatens	666	+	cGTTAGtttc	MYB
Pp3c15_24980|Ppatens	2394	-	acaaCTAACg	MYB
Pp3c15_24980|Ppatens	500	-	gAGACA	ARF
Pp3c15_24980|Ppatens	1844	-	tgCGGCT	ERF
Pp3c6_21840|Ppatens	2316	+	gtGTCGGatt	ARF
Pp3c6_21840|Ppatens	1217	-	ttTGTCGca	ARF
Pp3c6_21840|Ppatens	2315	-	tgTGTCGga	ARF
Pp3c6_21840|Ppatens	227	+	tTGATTgg	WOX
Pp3c6_21840|Ppatens	351	-	acAATCAc	WOX
Pp3c6_21840|Ppatens	2301	+	aTGATTgt	WOX
Pp3c6_21840|Ppatens	683	-	cggTGGTTcc	MYB
Pp3c6_21840|Ppatens	1629	+	acagAACGGa	MYB
Pp3c6_21840|Ppatens	1707	-	gcaaCTAACg	MYB
Pp3c6_21840|Ppatens	311	-	gAGACA	ARF
Pp3c6_21840|Ppatens	783	+	TGTCTc	ARF
Pp3c6_21840|Ppatens	939	-	gAGACA	ARF
Pp3c6_21840|Ppatens	2130	+	TGTCTc	ARF
Pp3c6_21840|Ppatens	1455	+	TTAATgg	WOX
Cre16.g667900|Creinhardtii	248	+	caGGATCcag	ARR-B
Cre16.g667900|Creinhardtii	248	-	cagGATCCag	ARR-B
Cre16.g667900|Creinhardtii	2296	+	ctGTCGGctc	ARF
Cre16.g667900|Creinhardtii	1073	+	cgCGACAgc	ARF
Cre16.g667900|Creinhardtii	2107	+	ggCGACAtc	ARF
Cre16.g667900|Creinhardtii	2295	-	gcTGTCGgc	ARF
Cre16.g667900|Creinhardtii	2387	-	ccTGTCGcc	ARF
Cre16.g667900|Creinhardtii	1679	+	aTGATTgt	WOX
Cre16.g667900|Creinhardtii	841	+	gcAACCAacc	MYB
Cre16.g667900|Creinhardtii	841	-	gcAACCAacc	MYB
Cre16.g667900|Creinhardtii	581	+	AGCCGcg	ERF
Cre16.g667900|Creinhardtii	965	-	agCGGCT	ERF
Cre16.g667900|Creinhardtii	1245	-	gcCGGCT	ERF
Cre16.g667900|Creinhardtii	1528	-	cgCGGCT	ERF
Cre16.g667900|Creinhardtii	2298	-	gtCGGCT	ERF
LOC_Os04g55970|Osativa	1318	+	atAGATAtgt	ARR-B
LOC_Os04g55970|Osativa	1287	-	cgaGATCTat	ARR-B
LOC_Os04g55970|Osativa	2471	-	cgaTCGACaa	ARF
LOC_Os04g55970|Osativa	2473	+	atCGACAag	ARF
LOC_Os04g55970|Osativa	1944	+	gTGATTgt	WOX
LOC_Os04g55970|Osativa	1959	-	tgACCTAtct	MYB
LOC_Os04g55970|Osativa	2401	-	tcACCTAgct	MYB
LOC_Os04g55970|Osativa	1583	+	ttttAACGGa	MYB
LOC_Os04g55970|Osativa	355	+	TGTCTc	ARF
LOC_Os04g55970|Osativa	1352	+	TGTCTc	ARF
LOC_Os04g42570|Osativa	1258	+	gtGGATCcga	ARR-B
LOC_Os04g42570|Osativa	1258	-	gtgGATCCga	ARR-B
LOC_Os04g42570|Osativa	393	-	ccAATCAt	WOX
LOC_Os04g42570|Osativa	1681	+	aTGATTga	WOX
LOC_Os04g42570|Osativa	2338	-	agcTGGTTgc	MYB
LOC_Os04g42570|Osativa	1905	+	TGTCTc	ARF
LOC_Os04g42570|Osativa	1306	-	tgCGGCT	ERF
LOC_Os04g42570|Osativa	2059	-	gtCGGCT	ERF
LOC_Os07g03250|Osativa	293	+	atAGATAtgc	ARR-B
LOC_Os07g03250|Osativa	945	-	tcTGTCGca	ARF
LOC_Os07g03250|Osativa	1099	-	gcTGTCGcc	ARF
LOC_Os07g03250|Osativa	929	+	gTGATTgg	WOX
LOC_Os07g03250|Osativa	1469	+	tTGATTga	WOX
LOC_Os07g03250|Osativa	1473	+	tTGATTgc	WOX
LOC_Os07g03250|Osativa	570	-	tgtTGGTTgc	MYB
LOC_Os07g03250|Osativa	570	+	tgtTGGTTgc	MYB
LOC_Os07g03250|Osativa	1331	-	gaCGGCT	ERF
LOC_Os07g03250|Osativa	1518	+	AGCCGgc	ERF
LOC_Os07g03250|Osativa	1891	+	AGCCGcc	ERF
LOC_Os07g03250|Osativa	2266	+	TTAATcg	WOX
LOC_Os01g67410|Osativa	265	-	cccTATCTta	ARR-B
LOC_Os01g67410|Osativa	1552	-	gccTATCTtc	ARR-B
LOC_Os01g67410|Osativa	2269	-	gcaTATCTat	ARR-B
LOC_Os01g67410|Osativa	363	+	gaGGATCcta	ARR-B
LOC_Os01g67410|Osativa	363	-	gagGATCCta	ARR-B
LOC_Os01g67410|Osativa	863	-	acaGATCCta	ARR-B
LOC_Os01g67410|Osativa	1788	+	ttAGATCttg	ARR-B
LOC_Os01g67410|Osativa	1788	-	ttaGATCTtg	ARR-B
LOC_Os01g67410|Osativa	1493	+	gTGATTga	WOX
LOC_Os01g67410|Osativa	110	-	acACCTAgct	MYB
LOC_Os01g67410|Osativa	1306	-	tCCGTTaaaa	MYB
LOC_Os01g67410|Osativa	107	-	gAGACA	ARF
LOC_Os01g67410|Osativa	2039	-	gAGACA	ARF
LOC_Os03g07940|Osativa	413	+	aaAGATAagc	ARR-B
LOC_Os03g07940|Osativa	989	-	acgTATCTat	ARR-B
LOC_Os03g07940|Osativa	1799	+	aaAGATAagt	ARR-B
LOC_Os03g07940|Osativa	1983	+	agAGATAcgg	ARR-B
LOC_Os03g07940|Osativa	1574	+	atGGATCtgt	ARR-B
LOC_Os03g07940|Osativa	1714	-	tcAATCAt	WOX
LOC_Os03g07940|Osativa	1425	-	cagTGGTTgg	MYB
LOC_Os03g07940|Osativa	25	+	aacgAACGGg	MYB
LOC_Os03g07940|Osativa	2241	-	tCCGTTtgtt	MYB
LOC_Os03g07940|Osativa	367	+	TGTCTc	ARF
LOC_Os03g07940|Osativa	436	+	TGTCTc	ARF
LOC_Os03g07940|Osativa	1365	+	TGTCTc	ARF
LOC_Os03g07940|Osativa	2253	+	TGTCTc	ARF
LOC_Os03g07940|Osativa	385	-	gtCGGCT	ERF
LOC_Os03g07940|Osativa	1477	-	gaCGGCT	ERF
LOC_Os03g56050|Osativa	1069	+	ccGGATCcaa	ARR-B
LOC_Os03g56050|Osativa	1069	-	ccgGATCCaa	ARR-B
LOC_Os03g56050|Osativa	2100	-	acaGATCCcc	ARR-B
LOC_Os03g56050|Osativa	832	-	ttaCCGACaa	ARF
LOC_Os03g56050|Osativa	834	+	acCGACAaa	ARF
LOC_Os03g56050|Osativa	365	+	aTGATTgg	WOX
LOC_Os03g56050|Osativa	1743	+	aTGATTgt	WOX
LOC_Os03g56050|Osativa	2430	+	aTGATTga	WOX
LOC_Os03g56050|Osativa	571	+	gggTAGGTtg	MYB
LOC_Os03g56050|Osativa	1282	-	ggtTGGTTaa	MYB
LOC_Os03g56050|Osativa	1365	-	ggtTGGTTaa	MYB
LOC_Os03g56050|Osativa	1944	+	aGTTAGttac	MYB
LOC_Os03g56050|Osativa	570	-	agggTAGGTt	MYB
LOC_Os03g56050|Osativa	104	-	gcATTAA	WOX
LOC_Os03g56050|Osativa	177	-	gcATTAA	WOX
LOC_Os03g56050|Osativa	397	+	TTAATgg	WOX
LOC_Os03g56050|Osativa	895	+	TTAATcc	WOX
LOC_Os03g56050|Osativa	945	-	ggATTAA	WOX
LOC_Os03g56050|Osativa	1546	-	ggATTAA	WOX
LOC_Os03g56050|Osativa	1786	+	TTAATcc	WOX
LOC_Os02g40070|Osativa	630	-	ccaTATCTta	ARR-B
LOC_Os02g40070|Osativa	816	+	ccGGATCgga	ARR-B
LOC_Os02g40070|Osativa	1479	+	tcGGATCcaa	ARR-B
LOC_Os02g40070|Osativa	1479	-	tcgGATCCaa	ARR-B
LOC_Os02g40070|Osativa	909	-	tcAATCAg	WOX
LOC_Os02g40070|Osativa	378	+	tgaTAGGTtg	MYB
LOC_Os02g40070|Osativa	1063	-	ggcTGGTTgg	MYB
LOC_Os02g40070|Osativa	1063	+	ggcTGGTTgg	MYB
LOC_Os02g40070|Osativa	916	-	ggCGGCT	ERF
LOC_Os02g40070|Osativa	147	-	gcATTAA	WOX
LOC_Os02g40070|Osativa	390	-	ggATTAA	WOX
LOC_Os02g40070|Osativa	607	-	gcATTAA	WOX
LOC_Os06g44750|Osativa	931	-	tcaTATCTat	ARR-B
LOC_Os06g44750|Osativa	1432	-	gccGATCCgg	ARR-B
LOC_Os06g44750|Osativa	1523	+	atGGATCcat	ARR-B
LOC_Os06g44750|Osativa	1523	-	atgGATCCat	ARR-B
LOC_Os06g44750|Osativa	470	+	ttGTCGAcca	ARF
LOC_Os06g44750|Osativa	470	-	ttgTCGACca	ARF
LOC_Os06g44750|Osativa	469	-	gtTGTCGac	ARF
LOC_Os06g44750|Osativa	207	-	tcACCTAtca	MYB
LOC_Os06g44750|Osativa	520	+	ggcTAGGTtt	MYB
LOC_Os06g44750|Osativa	1591	+	agcTAGGTgc	MYB
LOC_Os06g44750|Osativa	2208	+	ccAACCAcca	MYB
LOC_Os06g44750|Osativa	1613	+	aGTTAGttat	MYB
LOC_Os06g44750|Osativa	2072	+	aGTTAGtttc	MYB
LOC_Os06g44750|Osativa	2208	-	ccAACCAcca	MYB
LOC_Os06g44750|Osativa	1847	+	AGCCGca	ERF
LOC_Os06g44750|Osativa	2123	-	ggATTAA	WOX
LOC_Os06g05340|Osativa	256	-	tcgTATCTga	ARR-B
LOC_Os06g05340|Osativa	1835	+	gcGGATCcac	ARR-B
LOC_Os06g05340|Osativa	1835	-	gcgGATCCac	ARR-B
LOC_Os06g05340|Osativa	1981	-	ctaGATCCgc	ARR-B
LOC_Os06g05340|Osativa	1304	+	ctAGATCtta	ARR-B
LOC_Os06g05340|Osativa	1304	-	ctaGATCTta	ARR-B
LOC_Os06g05340|Osativa	2265	+	atCGACAac	ARF
LOC_Os06g05340|Osativa	460	+	agaTAGGTga	MYB
LOC_Os06g05340|Osativa	807	+	ttttAACGGa	MYB
LOC_Os06g05340|Osativa	1911	-	ccATTAA	WOX
LOC_Os12g03290|Osativa	933	+	ccGGATCcag	ARR-B
LOC_Os12g03290|Osativa	933	-	ccgGATCCag	ARR-B
LOC_Os12g03290|Osativa	1362	+	tcGGATCgga	ARR-B
LOC_Os12g03290|Osativa	946	+	ctGTCGGcgg	ARF
LOC_Os12g03290|Osativa	1112	+	ctGTCGGcgg	ARF
LOC_Os12g03290|Osativa	1522	-	attCCGACcc	ARF
LOC_Os12g03290|Osativa	945	-	ccTGTCGgc	ARF
LOC_Os12g03290|Osativa	1111	-	ccTGTCGgc	ARF
LOC_Os12g03290|Osativa	1836	+	tTGATTgc	WOX
LOC_Os12g03290|Osativa	581	-	tgACCTAtca	MYB
LOC_Os12g03290|Osativa	437	-	aggTGGTTca	MYB
LOC_Os12g03290|Osativa	1332	-	gaaaCTAACa	MYB
LOC_Os12g03290|Osativa	63	+	TGTCTc	ARF
LOC_Os12g03290|Osativa	619	+	TTAATcg	WOX
LOC_Os12g03290|Osativa	633	+	TTAATcc	WOX
LOC_Os12g03290|Osativa	2343	+	TTAATgc	WOX
LOC_Os05g45954|Osativa	345	+	ggAGATCttt	ARR-B
LOC_Os05g45954|Osativa	345	-	ggaGATCTtt	ARR-B
LOC_Os05g45954|Osativa	2326	-	tcTGTCGcc	ARF
LOC_Os05g45954|Osativa	1317	-	gcAATCAt	WOX
LOC_Os05g45954|Osativa	632	-	aggTGGTTac	MYB
LOC_Os05g45954|Osativa	416	+	atttAACGGt	MYB
LOC_Os05g45954|Osativa	968	+	agttAACGGg	MYB
LOC_Os05g45954|Osativa	2488	-	acaaCTAACa	MYB
LOC_Os05g45954|Osativa	2028	+	TGTCTc	ARF
LOC_Os05g45954|Osativa	2183	-	gAGACA	ARF
LOC_Os05g45954|Osativa	2305	+	TGTCTc	ARF
LOC_Os05g45954|Osativa	2376	+	TGTCTc	ARF
LOC_Os05g45954|Osativa	705	-	gaCGGCT	ERF
LOC_Os05g45954|Osativa	2174	+	AGCCGcc	ERF
LOC_Os05g45954|Osativa	1167	-	ccATTAA	WOX
LOC_Os05g45954|Osativa	1530	+	TTAATcg	WOX
LOC_Os11g03540|Osativa	735	-	ataTCGACag	ARF
LOC_Os11g03540|Osativa	309	-	gcAATCAg	WOX
LOC_Os11g03540|Osativa	414	+	tTGATTga	WOX
LOC_Os11g03540|Osativa	652	+	gTGATTgc	WOX
LOC_Os11g03540|Osativa	1811	+	tTGATTgc	WOX
LOC_Os11g03540|Osativa	641	+	tGTTAGttgt	MYB
LOC_Os11g03540|Osativa	68	+	TGTCTc	ARF
LOC_Os11g03540|Osativa	555	+	TGTCTc	ARF
LOC_Os11g03540|Osativa	125	+	TTAATgg	WOX
LOC_Os11g03540|Osativa	2339	+	TTAATgc	WOX
LOC_Os11g19060|Osativa	380	+	ttGGATCcag	ARR-B
LOC_Os11g19060|Osativa	380	-	ttgGATCCag	ARR-B
LOC_Os11g19060|Osativa	2409	+	gaCGACAag	ARF
LOC_Os11g19060|Osativa	2416	+	agAACCAcct	MYB
LOC_Os11g19060|Osativa	1992	+	TGTCTc	ARF
LOC_Os11g19060|Osativa	397	+	AGCCGtc	ERF
LOC_Os11g19060|Osativa	20	-	ggATTAA	WOX
LOC_Os11g19060|Osativa	105	-	ggATTAA	WOX
LOC_Os11g19060|Osativa	1969	-	ggATTAA	WOX
DF237606.1|Knitens	2144	-	gctTATCTtt	ARR-B
DF237606.1|Knitens	514	+	tcGGATCtaa	ARR-B
DF237606.1|Knitens	2246	+	acAGATCttg	ARR-B
DF237606.1|Knitens	2246	-	acaGATCTtg	ARR-B
DF237606.1|Knitens	2360	+	ggCGACAtc	ARF
DF237606.1|Knitens	1726	+	tgcTAGGTat	MYB
DF237606.1|Knitens	510	+	TGTCTc	ARF
DF237606.1|Knitens	970	+	TGTCTc	ARF
DF237606.1|Knitens	1404	+	TGTCTc	ARF
DF237606.1|Knitens	3	-	gaCGGCT	ERF
DF237606.1|Knitens	627	-	ggCGGCT	ERF
DF237606.1|Knitens	1861	+	AGCCGtc	ERF
DF237606.1|Knitens	1891	+	TTAATgg	WOX
