# Supplementary material for: A Phylogenetic Study of the ANT Family Points to a preANT Gene as the Ancestor of Basal and euANT Transcription Factors in Land Plants
Source: Front Plant Sci. 2019 Jan 29;10:17. doi: 10.3389/fpls.2019.00017 (PMC6361745; doi:10.3389/fpls.2019.00017)
Supplement: Supplementary file 5 [file Data_Sheet_1.fasta]

Data sheet 1. Edited amino acid alignment of 114 ANT and 10 AP2 protein sequences utilized to reconstruct the phylogeny of ANT transcription factors.

>kfl00657_0020_v1.1_Kni
-----------------MRPEDHNPLVNTHLLKASHSSVVCPPDS-FEFALSGPARSSISVEVQGQ------------EP
ERLTRRAQDHSQAANLEAS------------VSLL---CHEG----NTEILYSNPVTISRRESIDE-----------SSG
EGMEAAQGGSPASQEMKQNSTAEGCTILQAETINESRTENLTTTLE-----------------TTGTPED----------
----GQAVRASARGEHLTPLSEAFRCVAKRT---------PTLLDSPPQQPASEDGQAPKGRDFESFIGEERATGTL---
-GENPDLRAGSL----------------DQAED------------GPVER----SLGGVKGLRTAFLSRDRARDADG---
--ARRLPRAARA--------------------------------------------------------------------
------------------------------------------------------------DPVSTQAGVQSSEALPGQPL
SNGLK---------------FPEGSPAEA-----------PGPFDRELLTS-LGIGKDS-----------RAAGSSPTAV
LSRALVAQPPDSLSLAHLSPPLGNTNHYHSP-SNVPAFAHSPSALDFLNSMPP---EPSRAPPSLSQFLQR---------
-------VTRSEDSFGAEPAEEAA----------PGIG-RKKQQVRPGKSTEPNALP---VILEGKPVEL-------NRR
VSASPKSPMDLVESDEDVNGAANSPSAVGKR--SSQYRGVT--------KHCSTGRYEAHLWDNSSRKEGIN-KKGRQVY
LGGYEKETDAARAYDLAALKYWGVGTNYNFPLKDYEQDLKEMEDVSRQEFVATLRRKSSGFSRGASKYRGVT-RHHQHGR
WEARIGRVLGNKYLYLGTYPTQEEAAQAYDIAAVKYRGVHAVTNFDLSRY------LEFMRPGGSQTL------------
-----------PAPPSAD---------------SEGGTGAE--SPRKRKRAGSERPAARSFEPRV---------------
--------------------------------------------------LSTQIVMPSPAPRFPEPASPTEPASPY---
QVDPRIDPRYAPLSVD-------------------------------------------------DQQALSDQFYFGG--
----------------------------------EFSPTLDQPFS------------PLNTTHAV------HL--PNPLQ
YCQLVP--------------------YPNLSLNFPQALSQLFPVYPGLGQ------------------------------
-----------------------------------------------------------------YPQTLPGAYAPGLQ-
-------------------------------------VGSD---------------------------------------
-----N-----------REGAEDAVH------------------------------------------------------
-------------------------------------------------------------------A--SNGLVP----
----------------------------------PGYS-----------------AWDAAQ-------------------
--------------
>FAJB_scaffold_2055992_Pha
MESVAGGRVED-----GMPPAEA---------------------------------------------------------
--------------------------------------------------------------------------------
--------------------------------------------------------------------------------
--------------------------------------------------------LEPL--------------------
--------------------------------------------------------------------------------
--------------------------------------------------------------------------------
--------------------------------------------------------------------------------
--------------------------------------------------------------------------------
--------------------------------------------------------------------------------
---------------------VSK---------------RTRRDRPSTA----------------------------KDR
ISKIPPS-------------------AVGKR--SSIYRGVT--------RHRWTGRYEAHLWDKSTWNQTQN-KKGKQVY
LGAYDEEEAAARAYDLAALKYWGPGTIINFPVTDYTRDIEEMQNVSREEYLASLRRKSSGFSRGVSKYRGVA-RHHHNGR
WEARIGRVFGNKYLYLGTYSTQEEAAAAYDMAAIEYRGLNAVTNFDLSRY------IKWLR-------------------
--------------PGQ-------------------AN------------------------------------------
-----------------VANSEESEDLKPGEQQQ-QHQQ---------------------QQQQPAQA------------
-------------------------------------------------QEQQS----------QAEPEESPVQMWPGQ-
----------ASEPYQFPSLGLTNG------------PQAQRTVP--------------TAPTAL---------------
-----------------------------GLLWQSNMFKQMLEKASAHSTPD-----------SQLEGDV---------L
GMPMFPGLEEDPTLPYEE--------------------------------------------------GQSD--------
------------GVYQDMPF-----P-----------S-CF----------GADGQEL----------------------
-----------DSGA---------------------------------------------------------PF-WNS--
LGAS---------------------------------------------------------------------GLPLRSP
ITV-----------------------------------------------------------------------------
--------------
>129793_Smo
--------------------------------------------------------------------------------
--------------------------------------------------------------------------------
--------------------------------------------------------------------------------
--------------------------------------------------------------------------------
--------------------------------------------------------------------------------
--------------------------------------------------------------------------------
--------------------------------------------------------------------------------
--------------------------------------------------------------------------------
--------------------------------------------------------------------------------
--------------------------------------------------------------------------------
---MPPC-------------------TAGKR--SSIYRGVT--------RHRWTGRYEAHLWDKGTWNHTQN-KKGKQGI
LHSYDDEEAAARAYDLAALKYWGPGTLINFPVTDYTRDIEEMQNVSREEYLASLRRRARAPSRRVSKYRGVA-RHHHNGR
WEARIGRVFGNKYLYLGTYSTQEEAATAYDMAAIEYRGLNAVTNFDLSRY------I-----------------------
--------------------------------------------------------------------------------
--------------------------------------------------------------------------------
--------------------------------------------------------------------------------
--------------------------------------------------------------------------------
--------------------------------------------------------------------------------
--------------------------------------------------------------------------------
--------------------------------------------------------------------------------
--------------------------------------------------------------------------------
--------------------------------------------------------------------------------
--------------------------------------------------------------------------------
--------------
>78076_Smo
--------------------------------------------------------------------------------
--------------------------------------------------------------------------------
--------------------------------------------------------------------------------
--------------------------------------------------------------------------------
--------------------------------------------------------------------------------
--------------------------------------------------------------------------------
--------------------------------------------------------------------------------
--------------------------------------------------------------------------------
--------------------------------------------------------------------------------
--------------------------------------------------------------------------------
-------------------------------------------------RHRWTGRYEAHLWDKGTWNHTQN-KKGKQGI
LHSYDDEEAAARAYDLAALKYWGPGTLINFPVTDYTRDIEEMQNVSREE-------KSSGFSRGVSKYRGVA-RHHHNGR
WEARIGRVFGNKYLYLGTYSTQEEAATAYDMAAIEYRGLNAVTNFDLSRY------------------------------
--------------------------------------------------------------------------------
--------------------------------------------------------------------------------
--------------------------------------------------------------------------------
--------------------------------------------------------------------------------
--------------------------------------------------------------------------------
--------------------------------------------------------------------------------
--------------------------------------------------------------------------------
--------------------------------------------------------------------------------
--------------------------------------------------------------------------------
--------------------------------------------------------------------------------
--------------
>85823_Smo
-----------------MPQVSS---------------------------------------------------------
--------------------------------------------------------------------------------
--------------------------------------------------------------------------------
--------------------------------------------------------------------------------
--------------------------------------------------------------------------------
--------------------------------------------------------------------------------
--------------------------------------------------------------------------------
--------------------------------------------------------------------------------
--------------------------------------------------------------------------------
-----------------QSTPVVK---------------RKRGPAGTSS----------------------------RER
SCKIPAP-------------------TAGKR--SSIYRGVT--------RHRWTGRYEAHLWDKSTWNHTQN-KKGKQ--
-GAYDDEEAAARAYDLAALKYWGPGTLINFPVTDYAKDIDEMQSVTREEYLASLRRKSSGFSRGVSKYRGVA-RHHHNGR
WEARIGRVFGNKYLYLGTYSTQEEAAAAYDMAAIEYRGLNAVTNFDLSRY------IRWLR-------------------
--------------P-----------------------------------------------------------------
--------------------------------------------------------------------------------
--------------------------------------------------------------------------------
--------------------------------------------------------------------------------
--------------------------------------------------------------------------------
--------------------------------------------------------------------------------
--------------------------------------------------------------------------------
--------------------------------------------------------------------------------
--------------------------------------------------------------------------------
--------------------------------------------------------------------------------
--------------
>PYHZ_scaffold_2073098_Isp
-----------------MAMESQ-----------------------LSF----DH-------------------------
--------------------------------------------------------------------------------
--------------------------------------------------------------------------------
--------------------------------------------------------MEPQ--------------------
--------------------------------------------------------------------------------
--------------------------------------------------------------------------------
------------------------------------------------------------------AGI-----------
--------------------------------------------------------------------------------
--------------------------------------------------------------------------------
---------------------------------------HKRKRGS----------------------------------
---TAKERISKMPPC-----------GAGKR--SSIYRGVT--------RHRWTGRYEAHLWDKSTWNQTQN-KKGKQVY
LGAYDEEEAAARAYDLAALKYWGPGTLINFPVSDYARDIEEMQNVTREEYLASLRRKSSGFSRGISKYKGVA-RHHQNGR
WEARIGRVFGSKYLYLGT---QEEAAAAYDMAAIEYRGVNTVTNLDLSRY------IRWLR-------------------
--------------PLP-------------------QASN----------------------------------------
----------------PAGENTQHNTT-----------------------------------SRPNTVVDAE--------
-------------------------------------------------DQPRH----------SQHQHRISQPLWPAQ-
----------CTEPYQLPSLGL----------------SSSHRKK--------------NTPSAL---------------
-----------------------------GLLLQSSMFQQMLEKSAARQKLQ----------------------------
---KESEITNNFTETE---------------------------------------------------NGNAD--------
----------FDHGYLV---------------------GCN----------QLSGDTNYKECYKD-------LKVHPACL
VEAPNHGSFEKEEEEE-EEAEEKKT------------LKPK---------------------------------------
-------D--------E---------------------GGLCLW-SSDFSAISN--------------------------
--------------------------------------------------------------------------------
--------------
>UUHD_scaffold_2150530_Ppi
-MSRRGG---------SMQLVAD---------------------------------------------------------
--------------------------------------------------------------------------------
--------------------------------------------------------------------------------
--------------------------------------------------------LEQQ--------------------
--------------------------------------------------------------------------------
--------------------------------------------------------------------------------
--------------------------------------------------------------------------------
--------------------------------------------------------------------------------
--------------------------------------------------------------------------------
-----------------------Q---------------KGRRARRAST----------------------------KER
VSKIP-S-------------------TPGRR--SSIYRGVT--------RHRWTGRYEAHLWDKSCWNQSQN-KKGRQVY
LGAYDDEEAAARAYDLAALKYWGPGTIINFPLTDYTKALQDMRDLSKEEYLASLRRKSSGFSRGVSKYRGVA-RHHHNGR
WEARIGRIFGNKYLYLGTYSTQEEAAAAYDMAAIEYRGLNAVTNFDLSRY------IRWLR-------------------
--------------PGQ-------------------AE-----------G-VLSPADPN---------------------
---------------GMVSSTQTNNSVVAGE-------------------------------LAPTVP------------
-------------------------------------------------VDVQG----------QS-------GIWNAT-
----------QACNDSYNQL-MT---------------QEANCKN--------------SSGSAL---------------
-----------------------------GLLSQSGIFKQMLERTIASD-------------------------------
------AVEEQTSSSAGN--------------------------------------------------SSPD--------
------------QSYCDVDQ-----Q-----------SHCN----------GEQGNGM----------------------
-----------DSGGI-MIMDNTAV------------DVKLELSFQEEVRD----VFDHSEMATMVDETEEFPF------
-GASVALD-------------------------------------RMFFQSDMSFPYFP-----PA-ELVDQGGAPLDSA
ISINSL-------------------------SLPYAIS-----------------TCS----------------------
--------------
>PITA_000026308
-----------------MKRIAA---------------------------------------------------------
--------------------------------------------------------------------------------
--------------------------------------------------------------------------------
--------------------------------------------------------DGES--------------------
--------------------------------------------------------------------------------
--------------------------------------------------------------------------------
--------------------------------------------------------------------------------
----------------------QSC-------------------------------------------------------
-----------FVSGS----------------------------------------------------------------
----------------GSTKPRVK---------------RVRRC------------------------------------
---VPKDKSQ--------------NATPGRR--SSVYRGVT--------RHRWTGRYEAHLWDKNCWNQGQN-KKGRQ--
-GAYDDEEAAAHTYDLAALKYWGTETILNFPLNTYAKELEEMQSVSKEEYLASLRRRSSGFSRGVSKYRGVA-RHHHNGR
WEARIGRVLGNKH-------------------------------------------------------------------
--------------PRG-------------------SSQG----------------------------------------
-------------------------------------------------LRHG-------SHRIPRFE------------
--------------------------------------------------------------------------------
--------------------------------------------------------------------------------
--------------------------------------------------------------------------------
--------------------------------------------------------------------------------
--------------------------------------CCN----------KL---------------------------
--------------------------------------------------------------------------------
--------------------------------------------------------------------------------
--------------------------------------------------------------------------------
--------------
>scaffold00101.2_Atr
-----------------MERQHS---------------------------------------------------------
--------------------------------------------------------------------------------
--------------------------------------------------------------------------------
--------------------------------------------------------ASPA--------------------
--------------------------------------------------------------------------------
--------------------------------------------------------------------------------
--------------------------------------------------------------------------------
----------------------P---------------------------------------------------------
-----------QVHG--DQ---------PPK-TTPKP-------------------------------------------
---------------------KTR---------------RIRRTVNGDQ----------------------------KRH
FGSIP-----------------------GRR--SSIYRGVT--------RHRWTGRYEAHLWDKNCWNQVQN-KKGRQ--
-GAYDDEEAAAHTYDLAALKYWGPGTILNFPLSTYAKELEEMQHLTKEEYLATLRRRSSGFSRGVSKYRGVA-RHHHNGR
WEARIGRVFGNKYLYLGTYSTQEEAAAAYDIAAIEYRGLNAVTNFDLSHY------IRSPF-------------------
--------------PQP-------------------TY------------------------------------------
---------------TFEDSQTPKFPMMAST-----------------------------NFQIPNSD------------
--------------------------------------------------------------------------------
--------------------------------------------------------------------------------
--------------------------------------------------------------------------------
---LCDAMVGPEFPSEQT--------------WAPQV------------------------DCS--FNGLPDSTTF----
---------EDIDFLFDNS--------------------------------QEEG-------------------------
----------VSEEKE-AKGNVDNT------------LQAS---------------------------------------
-GSS--------------------------------EGGREAMGLNHGDMSSMNSISYP---------------CP----
------------------------------------IS-----------------ICS----------------------
--------------
>scaffold00019.64_Atr
-----------------MAKTSN---------------------------------------------------------
--------------------------------------------------------------------------------
--------------------------------------------------------------------------------
--------------------------------------------------------HQST---ISTP-------------
--------------------------------------------------------------------------------
--------------------------------------------------------------------------------
--------------------------------------------------------------------------------
--------------------------------------------------------------------------------
-----------YSTTSTTT---------TQ--------------------------------------------------
---------------------KLK---------------RTRKS------------------------------------
---VPRD-------------------SPPQR--SSVYRGVT--------RHRWTGRYEAHLWDKNCWNESQN-KKGRQVY
LGAYDDEEAAARAYDLAALKYWGHDTILNFPLSTYTAELKEMEGLSKEEYIGSLRRKSSGFSRGVSKYRGVA-RHHHNGR
WEARIGRVFGNKYLYLGTYATQEEAATAYDMAAIEYRGLNAVTNFDLSRY------IKWLR-------------------
--------------PNN-------------------ST------------------------------------------
------------------NANPNPAAVT---------------------------------HPKPSPL------------
-------------------------------------------------DDVSA----------SSQPL----GV-----
-----------GCFEQSHHVGPPSS-------------SAARSNG--------------SASSAL---------------
-----------------------------GLLLQSSKFKEMLKMTSAADI------------------------------
------STKSPESEP-----------------LSAS--------------------------------AFPD--------
----------DVQTYFE----------------------CG----------GDSGGFVGD--------------------
----------FAETEG-MFGDLHAY------------G-SG---------------------------------------
------------------------------------------------FLCETSL-------------------------
--------------------------------------------------------------------------------
--------------
>MA_95471g0010
--------------------------------------------------------------------------------
--------------------------------------------------------------------------------
--------------------------------------------------------------------------------
--------------------------------------------------------------------------------
--------------------------------------------------------------------------------
--------------------------------------------------------------------------------
--------------------------------------------------------------------------------
--------------------------------------------------------------------------------
--------------------------------------------------------------------------------
--------------------------------------------------------------------------------
---------------------------------------MS--------RHRWTGRYEAHLWDKYCWNQSQS-KKGRQVY
LGAYDDEEAAAHAYDLAALKYWGQETVLNFPITTYTKEVEEMKDLSKEEYVGSLRRKSSGFSRGVSKYRGVA-RHHHNGR
WEARIGRVFGNKYLYLGTY-------------------------------------------------------------
--------------------------------------------------------------------------------
--------------------------------------------------------------------------------
--------------------------------------------------------------------------------
--------------------------------------------------------------------------------
--------------------------------------------------------------------------------
--------------------------------------------------------------------------------
--------------------------------------------------------------------------------
--------------------------------------------------------------------------------
--------------------------------------------------------------------------------
--------------------------------------------------------------------------------
--------------
>Solyc03g117720.2_Sly
-----------------MAKTSK---------------------------------------------------------
--------------------------------------------------------------------------------
--------------------------------------------------------------------------------
--------------------------------------------------------SNTT--------------------
--------------------------------------------------------------------------------
--------------------------------------------------------------------------------
--------------------------------------------------------------------------------
--------------------------------------------------------------------------------
------------STSSSSS---------SNKCDSKAK-------------------------------------------
----------RSNKIDGNAIGKVK---------------RTRKS------------------------------------
---VPRD-------------------SPPQR--SSIYRGVT--------RHRWTGRYEAHLWDKNCWNETQN-KKGRQVY
LGAYDDEEAAAHAYDLAALKYWGQDTMLNFPIMTYENELKEMEGQSKEEYIGSLRRKSSGFSRGVSKYRGVA-RHHHNGR
WEARIGRVFGNKYLYLGTYATQEEAATAYDMAAIEYRGLNAVTNFDLSRY------IKWLR-------------------
--------------PSD-------------------QTNN------DN-T-IINPE------------------------
-----------------PNPNPNPNDI----------------------------------HLMPNTK------------
-------------------------------------------------DDTNF----------TQQQQ----QI-----
----------SGCDVTVAALPHPGG-------------GAA------------------TSSAAL---------------
-----------------------------ELLLQSTKLKEMLERRSEV--------------------------------
-------IECPETPPEPD--------------RPRR--------------------------------SFPD--------
----------DIQTYFD----------------------C-----------QEPSSFI----------------------
-----------EEHDI-IFGDLDSL------------TLPM---------------------------------------
------------------------------------------------FQCE--LIN-----------------------
--------------------------------------------------------------------------------
--------------
>Solyc06g068570.2_Sly
-----------------MAKTSK---------------------------------------------------------
--------------------------------------------------------------------------------
--------------------------------------------------------------------------------
--------------------------------------------------------LSKQ--------------------
--------------------------------------------------------------------------------
--------------------------------------------------------------------------------
--------------------------------------------------------------------------------
--------------------------------------------------------------------------------
------------TCLSNKD---------TD--------------------------------------------------
-----------------NSISKVK---------------TKRK-------------------------------------
----PRD-------------------SPPQR--SSIYRGVT--------RHRWTGRYEAHLWDKNCWNESQT-KKGRQVY
LGAYNEEEAAAHAYDLAALKYWGQHTILNFSVSTYEKEIKEMETQSREEYIGSLRRRSSGFSRGVSRYRGVA-RHHHNGR
WEARIGRVFGNKYLYLGTYASEEEAAIAYDMAAIQYRGPNAVTNFDISRY------------------------------
---------------NN-------------------SL------------------------------------------
------------------GANPNDMNI-----------------------------------PMPNTN------------
-------------------------------------------------KEEK---------------------------
-----------------------------------------------------------TSSSV----------------
--------------------------------------------------------------------------------
-------VDCPETPPEVE--------------KCRRI------------------------------TTFPD--------
----------DIQTYFD----------------------CQ----------DSSSSFV----------------------
-----------EDSHI-IFGDLESF------------VLPMMFESCHQLEE----FLSFS------------PY------
----------------------------------------------SEFELETSD-------------------------
--------------------------------------------------------------------------------
--------------
>AT1G79700_AthWRI4
-----------------MAKVSG---------------------------------------------------------
--------------------------------------------------------------------------------
--------------------------------------------------------------------------------
--------------------------------------------------------RSKK---ISD--------------
--------------------------------------------------------------------------------
--------------------------------------------------------------------------------
--------------------------------------------------------------------------------
--------------------------------------------------------------------------------
------------KTASASE---------SA--------------------------------------------------
-----------------SIALTSK---------------RKRKS------------------------------------
---PPRN-------------------APLQR--SSPYRGVT--------RHRWTGRYEAHLWDKNSWNDTQT-KKGRQVY
LGAYDEEEAAARAYDLAALKYWGRDTLLNFPLPSYDEDVKEMEGQSKEEYIGSLRRKSSGFSRGVSKYRGVA-RHHHNGR
WEARIGRVFGNKYLYLGTYATQEEAAIAYDIAAIEYRGLNAVTNFDVSRY---------LN-------------------
--------------PNA-------------------AA------------------------------------------
-----------------DKADSDSKPIRS-------------------------------PSREPESS------------
-------------------------------------------------DDNKS----------PKSEE-----------
--------------------------------------------------------------------------------
--------------------------------------------------------------------------------
-------VIEPSTSPEVI--------------PTRR--------------------------------SFPD--------
----------DIQTYFG----------------------C-----------QDSGKLA----------------------
-----------TEEDV-IFDCFNSY------------INPGFYN--------------------------EFDY------
--------------------------------------------------------------------------GP----
--------------------------------------------------------------------------------
--------------
>AT1G16060_AthADAP
-----------S---PVMEDITR---------------------------------------------------------
--------------------------------------------------------------------------------
--------------------------------------------------------------------------------
--------------------------------------------------------QSKK---VEN--------------
--------------------------------------------------------------------------------
--------------------------------------------------------------------------------
--------------------------------------------------------------------------------
--------------------------------------------------------------------------------
------------ETGDDQS---------AT--------------------------------------------------
-----------------SVVLKAK---------------RKRRS------------------------------------
---QPRD-------------------APPQR--SSVHRGVT--------RHRWTGRYEAHLWDKNSWNETQT-KKGRQVY
LGAYDEEDAAARAYDLAALKYWGRDTILNFPLCNYEEDIKEMESQSKEEYIGSLRRKSSGFSRGVSKYRGVA-KHHHNGR
WEARIGRVFGNKYLYLGTYATQEEAAIAYDIAAIEYRGLNAVTNFDISRY------LKLPV-------------------
--------------PEN-------------------PIDT------AN-N-LL---------------------------
-----------------ESPHSDLSPF-----------------------------------IKPNHE------------
-------------------------------------------------SDLSQ----------SQSSSEDN--------
--------------------------------------DDRKTKL--------------LKSSPL---------------
--------------------------------------------------------------------------------
---VAEEVIGPSTPPEIA--------------PPRR--------------------------------SFPE--------
----------DIQTYFG----------------------C-----------QNSGKLTA---------------------
-----------EEDDV-IFGDLDSF------------LTPD---------------------------------------
------------------------------------------------FYSELNDC------------------------
--------------------------------------------------------------------------------
--------------
>Solyc12g010490.1_Sly
-----------------MGKLSQ---------------------------------------------------------
--------------------------------------------------------------------------------
--------------------------------------------------------------------------------
--------------------------------------------------------QNQI--------------------
--------------------------------------------------------------------------------
--------------------------------------------------------------------------------
--------------------------------------------------------------------------------
--------------------------------------------------------------------------------
----------R-NNLSTNN---------GN--------------------------------------------------
------------NII--GSIVKVK---------------RTRKT------------------------------------
---VPRD-------------------SPPQR--SSIYRGVT--------RHRWTGRYEAHLWDKNCWNESQN-KKGRQ--
-GAYDDEGTAAHAYDLAALKYWGSETILNFPVSTYEKEIIEMENQSREEYIGSLRRKSSGFSRGVSKYRGVA-RHHHNGR
WEARIGRVFGNKYLYLGTYATQEEAATAYDMAAIEYRGLNAVTNFDLSRY------IKWLK-------------------
--------------PNK-------------------NN------------------------------------------
----------------QSNPNVETNMI-----------------------------------PTPNHSIGSTTIVTT---
TSSST-------------------------------------ALV---YPDSQL----------TTNTSISDVSI-----
--------------------------------------SQINRPS--------------SATSAL---------------
-----------------------------GLLLQSTKFKEMMEMTLAAECPP----------------------------
---------APIELPDPD--------------PPQS-------------------------------SNFPE--------
----------DIKTYFDT---------------------------------QEFGNFGHE--------------------
-----------QGEDL-VFNEINSL------------MQPH----------------------------LQFDY------
-DA-----------------------------------------------------------------------------
--------------------------------------------------------------------------------
--------------
>Sobic.002G206400_Sbi
-----------------M--------------------------------------------------------------
--------------------------------------------------------------------------------
--------------------------------------------------------------------------------
--------------------------------------------------------AKPR--------------------
--------------------------------------------------------------------------------
--------------------------------------------------------------------------------
--------------------------------------------------------------------------------
--------------------------------------------------------------------------------
----------KNSAAANNN---------NSS-SNGAG-------------------------------------------
-----------------DLTPRAK--------P------RTRKS------------------------------------
---VPRE-------------------SPTQR--SSVYRGVT--------RHRWTGRFEAHLWDKNSWNESQN-KKGKQ--
-GAYDDEEAAARAYDLAALKYWGPDTILNFPASAYEGEMKGMEGQSREEYIGSLRRKSSGFSRGVSKYRGVA-RHHHNGR
WEARIGRVFGNKYLYLGTYATQEEAAMAYDMAAIEYRGLNAVTNFDLSRY------IKWLR-------------------
--------------PGA-------------------GGMA----------------------------------------
---------------AAAAAAQNPHPMLGGLAQ---------------------------QLLLPPPADTTTT-------
-------------------------------------------------DGAGAA--------AFQHDHHGAEAF-----
----------------------------------PLPPRTSLGHT--------------PTTSAL---------------
-----------------------------SLLLQSPKFKEMIQRTESGTTTT----------------------------
TTTTSSLSSSPPPTPSPS--------------PPRRSPAPTQ------P-----PVQAAARDASPHQRGFPE--------
----------DVQTFFGCEDTAG---------------------------------------------------------
----------IDVEAL-FFGDLAAY------------ATPA---------------------------------------
--------------------------------------------------------------------------------
------------------------------------FH-----------------FEMDL--------------------
--------------
>MA_30905g0010_Pab
-----------QI----LVAGEN---------------------------------------------------------
--------------------------------------------------------------------------------
--------------------------------------------------------------------------------
--------------------------------------------------------NNLK--------------------
--------------------------------------------------------------------------------
--------------------------------------------------------------------------------
--------------------------------------------------------------------------------
----------------------AGEE------------------------------------------------------
----------SSASLK-SE---------AAA-KNGSS-------------------------------------------
-----------------LSQPKTK---------------RARKS------------------------------------
---LPKEK--------------PVDSNAARR--SSIYRGVT--------RHRSTGRYEAHLWDKSSWNETKH-KKGRQVY
LGAYNDEETAAHAYDLAALKYWGSETTLNFPSNTYSKELEAMQGISKEEYLASLRRRSSGFSRGVSKYRGVA-RHHHNGR
WEARIGRVFGNKYLYLGTYNTEEEAAAAYDMAAVEYRGLNAVTNFDLSRY------AAYLR-------------------
--------------PGQN------------------GFSV------EQSEFSSKAP------------------------
---------------EIEKSCISQGSYQSHHDET---------CE---------------SDRIPQSA------------
--------------------------------------------------------------------------------
-----------------------------------------------------------SASTAL---------------
-----------------------------ELLFQSAKFKEMLERSK----------------------------------
---SDSGLIQPE-----------------------------------------------------QSKSLEEKHES---I
------YSDDMMDAFFENSDLLI-----------NVEEGQDITQ----FLESSSCDNAD---------------------
-----------------FHGVEADME-----------IQISGLGIC----------------------------SSELDL
DQQDYDLMH---------------------------NPCMQSIDSIA---------------------------LPCVI-
----------------------------------SSYS------------------------------------------
--------------
>PYHZ_scaffold_2012844_Isp
-----------EDEIPGSVQNAA---------------------------------------------------------
--------------------------------------------------------------------------------
--------------------------------------------------------------------------------
--------------------------------------------------------LHPQ---IP---------------
--------------------------------------------------------------------------------
--------------------------------------------------------------------------------
--------------------------------------------------------------------------------
--------------------------------------------------------------------------------
--------------------------------------------------------------------------------
-----------------PDQGQIK---------------RRRRRVLSAE----------------------------EVA
DKASSSY-------------------SAGKR--SSIYRGVT--------RHRWTGRYEAHLWDKGSWNHSQN-KRGKQVY
LGAYDEEEAAAKAYDLAALKYWGPKSVLNFPVSEYVKDLQDMQLVSKEEYLASLRRKSSGFSRGVSKYRGVA-RHHHNGR
WEARIGRVFGNKYLYLGTYSTQEEAAAAYDMAAIEYRGLNAVTNFDLSRY------TRWLR-------------------
--------------PNQ-------------------LQ-----------L-LLEQQQQ----------------------
-----------------QQQHQHHLQLLQQQQQE-QHQQHQ-------QQQHN------FNHLACHQE------------
-------------------------------------------------QQQQQ----------QQQQQQ----------
--------------------------------------QQQQ--------------------------------------
---------------------------------QQQQQQQQQQQQQKYNHP-----------------------------
------QLQEQHAWTRIP--------------MLQH--------------------------------MSPA--------
----------HEHPFLALA--------------------CG----------SGSDDKD----------------------
-----------EDNNP-QYGQNPRT------------QMQA------------------SMMLEMMNT----PY-CPSRM
HNASYDED--------E------N------------TQGFLSLGHGHAFGSSSSNPIV----------------LP----
--------------------------------------------------------------------------------
--------------
>AT3G54320_AthWRI1
-----------------MKKRLT--------------------------TCS----------------------------
--------------------------------------------------------------------------------
--------------------------------------------------------------------------------
--------------------------------------------------------SSPS--------------------
--------------------------------------------------------------------------------
--------------------------------------------------------------------------------
--------------------------------------------------------------------------------
--------------------------------------------------------------------------------
----------SSVSSSTTT---------SSPIQSEAP-------------------------------------------
------------------RPKRAK---------------RAKKSSPSGD----------------------------KSH
NPTSP---------------------ASTRR--SSIYRGVT--------RHRWTGRFEAHLWDKSSWNSIQN-KKGKQVY
LGAYDSEEAAAHTYDLAALKYWGPDTILNFPAETYTKELEEMQRVTKEEYLASLRRQSSGFSRGVSKYRGVA-RHHHNGR
WEARIGRVFGNKYLYLGTYNTQEEAAAAYDMAAIEYRGANAVTNFDISNY------IDRLKKKGVFPF------------
--------------PVNQ------------------ANHQ------EGILVEAKQ-------------------------
---------------EVETREAKEEPREEVKQQY--------------------------VEEPPQEEEEKEEEK-----
----------------------------------------------------------------AEQQEAEIVGY-----
-----------------------------------------------------------SEEAAV---------------
-----------------------------NCCIDSSTIMEMDRCGDNNELAW---NFCMMDTG----------------F
LTDQNLANENPIEYPELF-----------------------------------------------NELAFED--------
----------NIDFMFDDGKHEC------LNLEN---LDCCVVGR------ESPPSSSS------------------SCL
-----------------STDSASST-------------------------------------------------------
------------------------------------TTTTTSVSCN----------------------------------
----------------------------------YLFQ-------------G--FVGSE---------------------
--------------
>Solyc01g096860.1_Sly
-----------------MKKSPS-------------------------FSCS----------------------------
---SSSSSSSC--------------------I------------------------------------------------
------------EQIHEETEKLNL--------------------------------------------------------
--------------------------------------------------------PKPK--------------------
--------------------------------------------------------------------------------
--------------------------------------------------------------------------------
--------------------------------------------------------------------------------
--------------------------------------------------------------------------------
------P-------------------------------------------------------------------------
---------------------------------------KPKPKP--------------------------------RLK
RASRAKKIVNA---------SPSNNSSTARR--SSIFRGVT--------RHRWTGRYEAHLWDKSTWNSIQK-KKGRQIY
LGAYDSEEAAARTYDLAALKYWGPTTLLNFPVERYSKEFEEMQRLTKEEYLASLRRMSSGFSRGVSKYRGVA-RHHHNGR
WEARIGRVYGNKYLYLGTYSTQEEAAAAYDMAAIEYRGPNAVTNFDISRY-----HLKKLREPDLLTKEENTESAEV---
----QSSEVIEQYQPVQQEESQFDYQ----------AELAAEPIVVPKLE------------------------------
------------FTPALDFDEVTQPKVLKLEFAA-----------------------------------------DLI--
------------------------------------------------NAKDH------------EEEEDYPWMNMYLD-
---------------D-------------------------------------TFDSLPVSDFSL---------------
--------------------------------DKPTDLMDLFNDNSFDNN------------------------------
---IDFDFYEQSSENEF------------------------------------------------NLNVFSDSMII----
-------------------------------------DGIEADN---EEVRNNLSISPT---------------------
-----------------SSSSMSRTT-----------------------------------------------SISNDMK
DDGGLASST-----------------------------------------------------------------------
--------------------------------------------------------------------------------
--------------
>LOC_Os11g03540_Osa
----------------MAKRSS----------------------------------------------------------
---PDPASSS----------------------------------------------------------------------
--------------------------------------------------------------------------------
----------------------------------------------------------PS--------------------
--------------------------------------------------------------------------------
--------------------------------------------------------------------------------
--------------------------------------------------------------------------------
--------------------------------------------------------------------------------
-------ASSSPSSPSSSS---------SEDSSSPMSMPCKRRA------------------------------------
---------RPRTD---KSTGKAK---------------RPKKESKEVV-------------------------------
---DPSSNG-------------GGGGGGGKR--SSIYRGVT--------RHRWTGRFEAHLWDKNCSTSLQNKKKGRQGC
LGAYDSEEAAARAYDLAALKYWGPETVLNFPLEEYEKERSEMEGVSREEYLASLRRRSSGFSRGVSKYRGVA-RHHHNGR
WEARIGRVLGNKYLYLGTFDTQEEAAKAYDLAAIEYRGANAVTNFDISCYLDQPQLLAQLQQEPQLLAQLQQELQVV---
--------------PAL-------------------HEEPQ---DDDRSENAVQE-------------------------
------------LSSSEANTSSDNNEPLAADDSA----------------------------------------------
---------------------------------------------EC--MNEPLPIV-----DGIEESLWSPCLDYELD-
--------------------TMPG--------------------------------AYFSNSMNF---------------
-------------SEWF---------------------------------------------------------------
-----------------------------------------------------------------NDEAFEGGMEYL---
-----F-------------------------------EGCS------------------SI-------------------
-----------------TEGGNS-----------------------------------------------------MDNS
GVTEYNLFEECNMLEKDI----SDFLDKDISDFLDKDISISDRER----------------I------------SPQANN
I-----------------------------SCPQKMIS------------------------------------------
-----------VCN
>LOC_Os12g03290_Osa
----------------MAKRSS----------------------------------------------------------
---PDPASSS----------------------------------------------------------------------
--------------------------------------------------------------------------------
----------------------------------------------------------PS--------------------
--------------------------------------------------------------------------------
--------------------------------------------------------------------------------
--------------------------------------------------------------------------------
--------------------------------------------------------------------------------
-------ASSSPSSPSSSS---------SEDSSSPMSMPCKRRA------------------------------------
---------RPRTE---KSTGKAK---------------RPKKESKEVA-------------------------------
---DPSSNGG----------------GGGKR--SSIYRGVT--------RHRWTGRFEAHLWDKNCSTSLQNKKKGRQ--
-GAYDSEEAAARAYDLAALKYWGPETVLNFPLEEYEKERSEMEGVSREEYLASLRRRSSGFSRGVSKYRGVA-RHHHNGR
WEARIGRVLGNKYLYLGTFDTQEEAAKAYDLAAIEYRGANAVTNFDISCYLDQPQLLAQLQQEPQLLAQLQQEPQVV---
--------------PAL-------------------HEEPQ---DDDRSENAVQE-------------------------
------------LSSSEANTSSDNNEPLAADDSA----------------------------------------------
---------------------------------------------EC--MNEPLPIV-----DGIEESLWSPCLDYELD-
--------------------TMPG--------------------------------AYFSNSMNF---------------
-------------SEWF---------------------------------------------------------------
-----------------------------------------------------------------NDEAFEGGMEYL---
-----F-------------------------------EGCS------------------SI-------------------
-----------------TEGGNS-----------------------------------------------------MDNS
GMAEYNLFEECNMLEKDI----SDFLDKDISDFLDKDISISDRER----------------I------------SPQANN
I-----------------------------SCPQKMIS------------------------------------------
-----------VCN
>Sobic.005G021000_Sbi
---------------MDMERSQ----------------------------------------------------------
------QQKS----------------------------------------------------------------------
--------------------------------------------------------------------------------
----------------------------------------------------------PT--------------------
--------------------------------------------------------------------------------
--------------------------------------------------------------------------------
--------------------------------------------------------------------------------
--------------------------------------------------------------------------------
-------ESPPPPSPSSSS---------SSVSADTVLPPPGKRR------------------------------------
---------RAATTAKAKAGAKPK---------------RARKDAAAAA-------------------------------
---DPPPP--------------PAAAAAGKR--SSVYRGVT--------RHRWTGRFEAHLWDKHCLAALHNKKKGRQVY
LGAYDSEEAAARAYDLAALKYWGPETLLNFPVEDYSSEMPEMEGVSREEYLASLRRRSSGFSRGVSKYRGVA-RHHHNGR
WEARIGRVFGNKYLYLGTFDTQEEAAKAYDLAAIEYRGVNAVTNFDISCYLDHPLFLAQLQQEPQVV-------------
--------------PAL-------------------NQEAQ--PDQSETETIAQE-------------------------
---------------SVSSEAKTPDDNAEPDDNA----------------------------------------------
---------------------------------------------EPDDIAEPLITVD----DSIEESLWSPCMDYELD-
--------------------TMSR--------------------------------SNFGSSINL---------------
-------------SEWF---------------------------------------------------------------
-----------------------------------------------------------------NDADFDSNIGCL---
-----F-------------------------------DGCS------------------AV-------------------
-----------------DEGGKDGVG-------------------------------------------------LADFS
LLEDFSLFEAGDGQLKDV---------------------LSDMEEG---------------I------------QPPTM-
--------------------------------------------------------------------------------
---------ISVCN
>scaffold00202.3_Atr
-----------------VKSEENHEK-----------------RC-LGI-------------------------------
--------------------------------------------------------------------------------
--------------------------------------------------------------------------------
--------------------------------------------------------TQEK--------------------
--------------------------------------------------------------------------------
--------------------------------------------------------------------------------
--------------------------------------------------------------------------------
-KCVK---------------------------------------------------------------------------
--------------------------------------------------------------------------------
---------------------------------------RRRREHAPLT----------------------------RSD
DNGDSIKEID------------QSSSTAVKR--SSRFRGVS--------RHRWTGRFEAHLWDKGSWNASQK-KKGKQ--
-GAYDEEESAARAYDLAALKYWGPTTFTNFPVVDYEKEIQIMQNVTREEYLASLRRKSSGFSRGVSKYRGVA-RHHHNGR
WEARIGRVFGNKYLYLGTYSTQEEAAAAYDIAAIEYRGVNAVTNFDLSTY------IRWLR-------------------
--------------PGG-------------------LN------------------------------------------
-----------------NMANLNQPERVASKID---------------------------ESSIPPTPLST---------
-------------------------------------------------MNESM----------AEDFRQTTCLTW----
------------LPDILHQPPLSPNS----------LTMTCRKSS--------------SSPTAL---------------
-----------------------------SLLLQSSVFRELVEKTS----------------------------------
--IASANEEAVSTGPTED--------------CRQR-----------------------------QRGNCPDVAASSIA-
------IGDEYGGIFYDSTHDLGDIP-----------FICS----------SN---------------------------
-----------DEDLV-VEGSVEYF------------ERAG---------------------------------------
--------------------------------------SQQSLW-SNVLNSTIDVNM-----------------------
--------------------------------------------------------------------------------
--------------
>Solyc06g066390.1_Sly
-----------------MDLNKD--------------------SY-LVKEMS----------------------------
--------------------------------------------------------------------------------
--------------------------------------------------------------------------------
---------------------------------------------------------SPG---MVDY-------------
--------------------------------------------------------------------------------
--------------------------------------------------------------------------------
-------------------------------------------------------------------GI-----------
---------------------PETTKRV----------------------------------------------------
--------------------------------------------------------------------------------
---------------------------------------KRRRRSPPAVGVVNDNI---------------G-----QAE
QQKMDSSKVDQ----------NIAHTPTVKR--SSRFRGVS--------RHRWTGRYEAHLWDKGSWNVTQK-KKGKQVY
LGAYDEEESAARAYDLAAIKYWGTSTFINFPISDYEKEIEIMQTVTKEEYLASLRRRSSGFARGVSKYRGVA-RHHHNGR
WEARIGRVFGNKYLYLGTYSTQEEAARAYDIAAIEYRGINAVTNFDLSTY------IRWLK-------------------
--------------PGVN------------------TQMA-----FQELR------------------------------
--------------SENQAIQTNTNDIINPINDP--------------QFTFGSNYFSTTRETLPPIPQSQEPI------
----------------------------------------------------------------ERK-------------
-------------------MPLSPCN-------------------------------KPPSPTAL---------------
-----------------------------SLLLRSSMYRELVEKNS----------------------------------
-TTIANEKDDPN--------------------------------------------------------------------
-------------------------------------MKNK----------QQVNTEDE-----------FY--------
-----RSDKLPALESM-DEGTTSSHL------------------------------------------------------
------------------------GDRAGQSFWDV---------------------------------------MP----
--------------------------------------------------------------------------------
--------------
>Solyc08g076380.1_Sly
-----------------MNAISVKCE-----------------------KLS----------------------------
--------------------------------------------------------------------------------
--------------------------------------------------------------------------------
----------------------------------------------------------PG---MVDY-------------
--------------------------------D-----------------------------------------------
--------------------------------------------------------------------------------
----------------------------------------VNN-------------------------------------
-KCIK---------------------------------------------------------------------------
--------------------------------------------------------------------------------
---------------------------------------RRRKSPATVVTV--------------------------NDN
SQKLDSSKVDQ---------NSIVQTPTVKR--SSRFRGVS--------RHRWTGRYEAHLWDKASWNVTQK-KKGKQVY
LGAYDEEESAARAYDLAAIKYWGTTTFTNFPISDYEKEIEIMQSMTKEEHLASLRRRSSGFARGVSKYRGVA-RHHHNNR
WEARIGRVFGNKYLYLGTYSTQEEAARAYDIAAIEYRGTNAMTNFDMNTY------IRWLK-------------------
--------------PNN-------------------TNSL------MQFQ-DLTSE------------------------
---------------DQPIQISNTNDMINPIHDS-SYSFNH-------NHFTTITTNTEKLYAIPRSQEPIE--------
--------------------------------------------------------------------------------
-----------------RKMPLSYCK-----------------KS--------------SSPTAL---------------
-----------------------------SLLLRSSMFQELVEK------------------------------------
---NSSTDSEESEENNMK--------------HGAQS-------------------------------------------
-------NRENEFLFCTNDK------------------------------------------------------------
---------LPKLESW-ENGTTSSS------------ASLG---------------------------------------
--------------------------------------------------------------------------------
--------------------------------------------------------------------------------
--------------
>LOC_Os06g05340_Osa
-----------------MET--------------------------YGL-------------------------------
--------------------------------------------------------------------------------
--------------------------------------------------------------------------------
---------------------------------------------------------------VKDEL------------
--------------------------------------------------------------------H-----------
--------------------------------------------------------------------------------
-------------------------------------------------------------------GI-----------
--------------------------------------------------------------------------------
------GGGQGRLYCEVKP---------AAP-------------------------------------------------
-------------AVITAAGGGAK--------------SKRRKREPSAAAMS-------------------------AVT
VAGNGKEAGGS-------N-------AANKR--SSRFRGVS--------RHRWTGRFEAHLWDKGTWNPTQK-KKGKQVY
LGAYNEEDAAARAYDLAALKYWGPTTYTNFPVADYEKELKLMQGVSKEEYLASIRRKSNGFSRGVSKYRGVA-RHHHNGR
WEARIGRVFGNKYLYLGTYSTQEEAARAYDIAAIEYRGINAVTNFDLSTY------IRWLK-------------------
--------------PPS---------------------------------------------------------------
---------------SSSAAGTP---------------------------------------------------------
------------------------------------------------------------------HHHG---GGMVVG-
------DRV----LAPAQSYPISAAADDDVAGCW--RPLPSPS-S--------------STTTAL---------------
-----------------------------SLLLRSSMFQELVAR----------QPVVEGDDGAVVSGDDADA-------
--DADSDVKEPPPESEYG--------------EVFAS------------------------DEA-AAAA-----------
-------------AY-----------------------GCS----------MYELDDS----------------------
---------FALIDDS-VWNCLI---------------------------------------------------------
--------------------------------------------------------------------------------
--------------------------------------------------------------------------------
--------------
>Sobic.010G035100_Sbi
-----------------METY----------------------------SLQ----------------------------
--------------------------------------------------------------------------------
--------------------------------------------------------------------------------
---------------------------------------------------------------VKDEL------------
--------------------------------------------------------------------------------
--------------------------------------------------------------------------------
--------------------------------------------------------------HGGGIGI-----------
--------------------------------------------------------------------------------
------GGGGQGLYCGATP-------RPAAP-AATGGGGGGG--------------------------------------
----------------DGAVKSNK---------------RSRKREPPPPPPSSLVT-----------MSNGGK----DEA
VAGSGDKSAS-------------SNSNASKR--SSRFRGVS--------RHRWTGRFEAHLWDKGTWNPTQK-KKGKQVY
LGAYNEEDAAARAYDLAALKYWGPTTYTNFPVVDYERELKVMQNVSKEEYLASIRRKSNGFSRGVSKYRGVA-RHHHNGR
WEARIGRVFGNKYLYLGTYSTQEEAARAYDIAAIEYRGINAVTNFDLSTY------IRWLK-------------------
--------------PGG-------------------GV------------------------------------------
---------------EDSAAGTPTSGVRAP--------------------------------GIPPASLSL---------
-------------------------------------------------QAGGL----------LQHPHGAAAGMLQVD-
------DDLYRGQLAAARGAALFSGGIDDVGSVYAGRPSPSPSPS--------------SSTTAL---------------
-----------------------------SLLLRSSVFQELVARNAGGGAAQQQQLVVADDDGAVSPADVVDA-------
------KVEQPEAEGELG--------------R--HG------------------------DQL-YGAARAD--------
---------EDEDAF-----------------------ACS----------MYELDDS----------------------
---------FARMEQS-LWGCLRSS------------DAPD---------------------------------------
--------------------------------------NMNNL-------------------------------------
--------------------------------------------------------------------------------
--------------
>LOC_Os05g45954_Osa
-----------------MDH-----------------------------SIM----------------------------
--MVKNEIEN----------------------------------------------------------------------
-----------------------------------------------------------------G--------------
--------------------------------------------------------SSPA---INALEGGAEAG------
--------------------------------------------------------------------------------
--------------------------------------------------------------------------------
--------------------------------------------------------------------------------
-PVVR---------------------------------------------------------------------------
--------------------------------------------------------------------------------
---------------------------------------RRRREPSLLAPINGDG----------------------DTN
GGGIGKSSLSG---------------ITVKR--SSRFRGVSRFRACRLSRHRWTGRFEAHLWDKNSWNPTQR-KKGKQVY
LGAYDEEEAAARAYDLAALKYWGPTTYTNFPVMDYEKELKIMENLTKEEYLASLRRKSSGFSRGVSKYRGVA-RHHQNGR
WEARIGRVFGNKYLYLGTYSTQEEAARAYDIAAIEYKGVNAVTNFDLRSY------ITWLKPTPAHVA--------MN--
--------------PA--------------------EALAMQ-PVDHFLPMETQM-------------------------
---------------------------------------------------------MMLPQSNPFTSYHNAQSL-----
------------------------------------GGGDGGS-------------------SSTNNQEASMIISPSGS-
--------------------------------------------------------RKRSSSTAL---------------
-----------------------------SLLLKSSMFRQLVEKNSDAG-------------------------------
---EENGGEMREPGAHP---------------------------------------------------------------
------EGYEYHNFF----------------------QGDA---------------APD---------------------
----------MDMCDLLSSGNVHAAS------------------------------------------------------
GSAGFEEDIAC-----------Y---------------------------------------------------------
----------------------------------SGFGSMQSLQ------------------------------------
--------------
>Sobic.009G212500_Sbi
-----------------MESS----------------------------GMM----------------------------
--MVKSEIESCG--------------------------------------------------------------------
-----------------------------------------------------------------GPSSS----------
--------------------------------------------------------TAPA---AGVVIGGSATTERGE--
--------------------------------------------------------------------HH----------
-----------------------------------------------------------------HHHHQ----------
--------------------------------------------------------------------------------
-VVVR---------------------------------------------------------------------------
--------------------------------------------------------------------------------
---------------------------------------RRRREPPLLAPIAGGGI------------------------
------KPLPS---------------ITVKR--SSRFRGVS--------RHRWTGRFEAHLWDKNSWNPTQR-KKGKQVY
LGAYDEEEAAARAYDLAALKYWGPTTYTNFPVMDYEKELKIMENLTKEEYLASLRRKSSGFSRGVSKYRGVA-RHHQNGR
WEARIGRVFGNKYLYLGTYSTQEEAARAYDIAAIEYKGVNAVTNFDLRSY------ITWLKPSGA---------------
--------------PAAF------------------NPEA----------------------------------------
---------------ALLMQAAPAEQLLHPAETA----------------------QMLPRVGNPFLLDHGA--------
----------------------------------APPGSSGGGG---------------------QDASMSSMVSPGAG-
-----------------------------------------------------GGMRRRGSSTAL---------------
-----------------------------SLLLKSSMFRQLVEKNSD---------------------------------
---AEEGVRDREDAAAA------------------------------------------------AAAAHPAGPGD----
--------YEYHNFF----------------------QGEA---------------------------------------
-----PP----DMCDLFSSGGGG------------------------------------------------------DHA
RNAGFHGEIAA-----------Y-DDGEGLDGW-----------------------------------------------
----------------------------------NGFGNMSSLQ------------------------------------
--------------
>Sobic.007G142700_Sbi
-----------------MARPRKNAGTDEDN---------------TGVSVT----------------------------
--------------------------------------------------------------------------------
-----------------------------------------------------------------G--------------
--------------------------------------------------------KPPK--------------------
--------------------------------------------------------------------------------
--------------------------------------------------------------------------------
--------------------------------------------------------------------------------
---LK---------------------------------------------------------------------------
--------------------------------------------------------------------------------
---------------------------------------RVRRKG-----------------------------------
---EPRES-----------------STPSQR--SSAYRGVT--------RHRWTGRFEAHLWDKDARNGSRN-KKGKQ--
-GAYDDEEAAARAHDLAALKYWGPATVLNFPLCGYDEELREMEAQPREEYIGSLRRRSSGFSRGVSKYRGVA-RHHHNGR
WEARIGRVLGNKYLYLGTFATQEEAAVAYDIAAIEHRGLNAVTNFDISHYVNHPSDVAAFQLPDDLPEC-----------
--------------PAAAIGVEETT-----------GGDA----------------------------------------
---------------------------------------------------------------------------EFH--
------------------------------------NGEEGY-------LQHHTSGP-----FGAQQQLPDETGALAAH-
--------------------------------------------------------QMAPNSSAL---------------
-----------------------------DMVLQSPKFKELMEQVSAAAAAVA--------------------------S
ESSIGGSMSSSSPS----------------------------------P----------------SLSSFSPSPLQLPSP
-------------------------------------SSLS----------SFSPSSPLQ--------------------
-----QPSPPLQQPEF-VEGAPAARC-----------------------------------------------SFPDDVQ
TFFDFENESDMSFMYAEVD-------------------------------------------------------------
----------------------TFLFGDLGAYAAPIFHFDLDV-------------------------------------
--------------
>Sobic.003G332300_Sbi
-----------------MTKPHSPS------------------SW-AASSLS----------------------------
--CVSSSSAS-----------------------------------------CDVPP------------------------
----------------------------------------------------WS--------------------------
----------------------------------------------------------PK--------------------
--------------------------------------------------------------------------------
--------------------------------------------------------------------------------
--------------------------------------------------------------------------------
--------------------------------------------------------------------------------
----------------------------SSK-------------------------------------------------
---------------------------------------SSRRRAKNGAAV-----------------------------
---TPRRT-------------------------SSIYRGVT--------RHRGTGKYEAHLWDKNAWSRTKN-KKGRQVY
LGAFDNEEAAARTYDLAALKYWGSDSTLNFPLESYRHEHDKMQRMTREAYLATLRRKSSCFSRGASGYRGVA-KHHHNGR
WEARIGYACGKKYLYLGTFGSQEEAARAYDLAALELRGHAAVTNFDTSNY--------------------------T---
----HKDDQ-RRPEPAVQ----------------------------RKPALKPKDEPVDEAPPLP---------------
--------------------------------------------------------------------------------
-----------------------------------------------------------------KAHHPVPT-------
----------------------PP----------LLTPKAEPGYEL-------------GEPLAL---------------
-----P--------------------PGPVLRDADDVDHAIAEILPALCMDP----------------------------
---ADFEARYPAR----------------------------------------------------RARALGGCPPDDQLL
-------------------------------------RGLALPD--S----VRFEDDIE---------------------
-----------------GTGEVQVQL-------------------------------------------------HAVVT
DVSGVDADA---------------------------AATISSLASAR---------------------------------
-------------------------------------------------------WWP----------------------
--------------
>S04TR2468_Cat
-----------------MELMSSS----------------IPEIW-QALQLIQPGSHSCGDA-------------LIPIP
TTTSSSAPSHFACNNNMFMPTT---C-----FS---QIRTEG---TPTPTSTPSPTTTTTLAGHHQ--------------
-----------------SSRAITPRTTTKTTTRTALRQHVSTPT------------------------------------
------------------------------------------------------RTPSPNKNNNNNLVMTSAAVAR----
-----------------------------EAAD---GD-------------------------MCIVGHNIQPEL-----
--------------------------------------------------------------------------------
------------------------------------PAAMVVDEPPPPPPS------------------------LPPMT
ITTTR----VRTAEL-----APSSSMSIR-T--------------RSMTNP-------------------------TTTT
IT----TNQQSPITSPIGS-------PIGSP-------------------------------------------------
---------VNSDHTNDSCSPTQS---------------CNKSRATR------------------------------PGA
RKQRPRDT------------------GPSTR--SSNYRGVT--------RHRWTGRYEAHLWDS--RRRCNS-KKGKQVY
LGGYEDEEQAARTYDRAAIRYWGREAVTNFPIEEYDEELVAIESTSKEELIASLRRKSSGFSRGASRYRGVT-RHHQHGR
WEARIGRVMGNKYLYLGTFATEEDAARAYDLAAIKFRGNAAITNFELTSY------------------------------
--------------------------------------------------------------------------------
--------------------------------------------------------------------------------
--------------------------------------------------------------------------------
--------------------------------------------------------------------------------
--------------------------------------------------------------------------------
------------------------------------------------P-------------------------------
-------------------------------------SGEA---------------------------------------
-----------------DNGTKEKKD------------------------------------------------------
-----------DVVAGENEEE-----------------------------------------------------------
--------------------------------------------------------------------------------
--------------
>HKZW_scaffold_2009335_Mca
-----------------MENEKKNSDPGNG-ITGYSSEKPVPNHWNVDFELA----------------------------
-AASSSDTSSSAKQE----------------I------------------------------------------------
------------SKYFDDCDSL--YSLLQSNKSNDKHAHL------------------------FGVHQFFNLMD-----
--------------------------------------------D----LQSDNGSNCPQVQDGHGFTGG--------IL
DEQNNRKVSANVG--------------SAECKD-----------------------------------------------
---IYLPR------------------------------------------------------------------------
----------------------HT--------------------------------------------------------
--------------------------------------------------------------------------------
----------QVLNIGHND---------GQPLSSLVCPLEAREGG-----------------------------------
---------------------------------------RSHKR------------------------------------
--------------------------LKGQQ--SSAYRGVT--------RHRWTGRYEAHLWDNSCRKSAKGHKKGRQVY
LGGYVEEDDAARAYDLAALKYWGPEAALNFPLNDYVKDIEDMKDVPKLEYIANIRRRSSGFSRGASKFRGVT-KHHQHGR
WEARIGRVLGNKYLYLGTFETQEEAAKAYDIAAVKYRGTSAVTNFSLGCY------LDGFTKESS---------------
--------------PGK-------------------GSNF---DPARKCE------------------------------
-------------TRITNHSSDDRNAKLSS--------------------------------------------------
--------------------------------------------------------------------------------
-----------------------------------------------------------NSSTTL---------------
--------------------------------------------------------------------------------
-----------------------------------------------------------------DSTKFPRGVQEF---
-------------------------------------VAQSF---------PQAESMYQE--------------------
-----------------ETGANAAS------GVETL--------------------------------------------
------------------------------------------------------------------I-------NPILI-
------------------------------DRQFPIFA-----------------AWDD---------------------
--------------
>FAJB_scaffold_2012584_Pha
--------------------------------------------------------------------------------
--------------------------------------------------------------------------------
--------------------------------------------------------------------------------
--------------------------------------------------------------------------------
--------------------------------------------------------------------------------
--------------------------------------------------------------------------------
--------------------------------------------------------------------------------
--------------------------------------------------------------------------------
----------------MSP---------GSQ-ASSVL-----TAS------LGAGG--TA-SGSMSTPT-----------
------------------SPRAAP---------------EPRKRG---AVR---------------------A----AGK
EP-SPRKSID----------------TFGQR--TSVYRGVT--------RHRWTGRYEAHLWDNSCRKEGQT-RKGRQVY
LGGYDKEEKAARAYDLAALKYWGPTTTINFPLSTYEKELEEMKNMTRQEYVASLRRKSSGFSRGASVYRGVT-RHHQHGR
WQARIGRVAGNKDLYLGTYSTQEEAAEAYDIAAIKFRGINAVTNFDISRY-----DTKRICSG-AV--------------
--------------TI--------------------GQLT------SKAALHNKEAAAAAAAGSS---------MEQQQQ
AVTQP----------ALEQQHQQEQHQQHSVVED-------------ERQTMLSVENSSNQQSSVMKNLQQWQMLYQ---
QQA-----------------QAHRNSWMDQHQ------------Q---QQQQQQQ---------AEHEQQQAQA--AAA-
------AAFSDSLAMQQH---------------------QQHKYL--------------QSAAGM---------------
--------------------------QHQGMHAQNAVLRNLMG-------------------------------------
---LDALPTDANDGSC--------------------------------------------------SNGF----------
---------------LSSGSN------PLMASTGG--GAYS----------SATGDSPRNS-------------------
----------SAVSEG-EEGTSKSAAG---SAYD---MQGD----------------LSRSISMYMSQ--------SPTV
VKSSYDPTG--------------------LTSWTT-NGSVQNLQQV----------------------------RPSMG-
-GHGGI---------------------------PPIFA-----------------VWNE---------------------
--------------
>UCRN_scaffold_2011439_Mto
MLEV-SA----GDLTQRMRSVNSVN------------------NW-LAFSLS-PHLNTDAPDLSGSAANNDACFN---AL
GALQRSDSSN--------------------------------------MDTLAMPS------------------------
------------------DGSL---CIMEAFGRSQQQP-----------KENWQMKSHALSRP------------QSQHY
L---------GSDLSRLTSS-------------------------LSQFELKQER-DGPK---LEDFLGGASLGGQ---Y
HSARTD--SAHRD---LDMYLAGAP-AFDSRGDSSRINVN-VPYS----------------------HHHLPYGAYHTTS
DV-MATMNSSHQHQGNGNGNNGGYDTNTCAAT-SGSRLVGQNADQSSLGDNGNPAGALCTLQNALHHSQ-----------
------HHAQNLLHVAAMDHT---AVSVSPGDHS----SMLTD-CSLQLPMPTSGQS---GGTMGPAGI-----------
-SAIK--TWLRHH-------QGAASEK--AGAGGA--SPLLQANLQSSKTG--------------------AGALNGIAN
L---------QSLSLSMSP---------GSQ-ASSVL-----TAP------LGSSG--TP---SGSTPT-----------
------------------SPRAAA---------------EPRKRG---AVR---------------------A----AGK
EP-SPRKSID----------------TFGQR--TSVYRGVT--------RHRWTGRYEAHLWDNSCRKEGQT-RKGRQVY
LGGYDKEEKAARAYDLAALKYWGPTTTINFPLSTYEKELEEMKNMTRQEYVASLRRKSSGFSRGASVYRGVT-RHHQHGR
WQARIGRVAGNKDLYLGTYSTQEEAAEAYDIAAIKFRGINAVTNFDISRY-----DTKRICSG-AV--------------
--------------TI--------------------GQLT------SKAALLNKEASAAT---------------EQLPP
TSSQP----------VLEQEQQQQQQQEQQQQQLLQQQRAQE-----ERQTMHSLENSSNQQSSVMKNLQQWQMLYQ---
QQA-----------------QAHRNSWV----------------E---QQQQQQ----------AEHEHQQ-----AAA-
------AAFSDSLSLQQHQ--------------------QQHKYM--------------QSAG-----------------
--------------------------QHSSMHSQSAVLRNLMG-------------------------------------
---LDALPTDGNDGSC--------------------------------------------------SNGF----------
---------------LSTGSN------PLMASTSGHAGAYS----------SATGDSPRN--------------------
----------SAVSEG-EEGTSKSA------GYDNV-LQGD----------------LSRSISMYMSH--------SPT-
VKSSYDPSP--------------------LSSWTT-NGSVQNL-QV----------------------------RQNMGG
VGHGI----------------------------PPIFA-----------------VWNE---------------------
--------------
>PQTO_scaffold_2011838_Lde
--------------------------------------------------------------------------------
--------------------------------------------------------------------------------
--------------------------------------------------------------------------------
--------------------------------------------------------------------------------
--------------------------------------------------------------------------------
--------------------------------------------------------------------------------
----------------------------------------------MQVPPGASGAA---AENGSMIGI-----------
-SALK--TWLRQH--------QNNAENG---------DTSSSN-SKNDGT--------------------------AIAN
L---------QSLALSMSP---------VSQ-SS-----------------------------SVAAPA-----------
-------------MMNV--ASSPP---------------ESKKRN---ASK---------------------A----GAK
AP-SQRKSID----------------TFGQR--TSVYRGVT--------RHRWTGRYEAHLWDNSCKKEGQT-RKGRQVY
LGGYDKEEKAARAYDLAALKYWGPTTTINFPVSDYEKELEEMKNMTRQEYVASLRRKSSGFSRGASVYRGVT-RHHQQGR
WQARIGRVAGNKDLYLGTFSTQEEAAEAYDIAAIKFRGINAVTNFDINRY-----DVKRIGSSPSL--------------
--------------LL--------------------GDTA------KR----IKEAEVC--------------------D
TSED-----------THHPQRSEENGKLQQ--------------------PVPIESDLSRKDFQDWQPTEPLQFREM---
QQ-------------------QQPKSWC-------------------------------------DQGQQN---------
-------YFPD------H---------------------SYQNFL--------------QPA------------------
-------------------------------SMPPAVLRNLIG-------------------------------------
---LDALAC---DTTC--------------------------------------------------SNAI----------
---------------LNNMTA---TNQTLVAN-----SAYS-----------ATPESPTR--------------------
-----------SVSQK-EEGNSKQT------AFDRI-LQGEPS---------------RGSYQLYLAQMQ------PQNL
MKSTYENNM--------------------LGSVIT--PTMQ-----------------------------IHG-RPLLA-
SAHM------------------------------PIFA-----------------LWNDT--------------------
--------------
>PQTO_scaffold_2011839_Lde
-----------------MMSVNN---------------------W-LGFSLS-PHPRFDAP-------------------
----DSSQ-Q---QSSITSLSMVPPAKSE-------SIGYDGSSDCYGVSEGNVPSPEMPDIS------PN---------
----------------TGTASL---CIMEALHQAHTGD------------PAWPLAGMTS-----------------SR-
----------GFHIAAALHP-----------ILATSYPRPKSNNETTV-QAKKEP-VAPK---LEDFLGGVSLGGR---Y
AERDH-PQQRNME----DMYYAPG--HVSLSRQNSQTNAN-RLYP-------R---------DVQAHFQQEE------VT
DTQSPVYEPSYGHSQHREE-----NVCMEMVN-VDRPIHAQNLLHE----------------------------------
------------------------AFGTNGQENL------FSD-CILQVPPGSSAAV---AENGSMNGI-----------
-SALK--TWLRQH--------QNSAENA---------DTSSSNSSKNDCT--------------------------AIAN
L---------QSLALSMSP---------VSQ-SS-----------------------------SVAAPQ-----------
-------------MANA--VGSPT---------------ESKKRL---ASK---------------------S----ASK
AP-SQRKSID----------------TFGQR--TSIYRGVT--------RHRWTGRYEAHLWDNSCKKEGQT-RKGRQVY
LGGYDKEEKAARAYDLAALKYWGPTTTINFPLSNYEKEVEEMKSMTRQEYVASLRRKSSGFSRGASIYRGVT-RHHQQGR
WQARIGRVAGNKDLYLGTFSTQEEAAEAYDIAAIKFRGISAVTNFDISRY-----DVKRICSSPSL--------------
--------------LL--------------------GDTA------KR----IKEIEVC--------------------D
TSDDQ----------NQHPQRSKENRLLQN---------------------VPAEGDLSHKNVEDWQIVAPLQSREM---
QQ------------------HEQHKCWY-------------------------------------DHGQQQ---------
-------YLPDHGV---H---------------------SYQNFL--------------QPA------------------
-------------------------------SMPPAVLRNLIG-------------------------------------
---LDTSLSC--DTAC--------------------------------------------------SNGI----------
---------------LNNMSA---TNQTLVSN-----SAYS-----------VTPESPTR--------------------
-----------SVSQN-GEGNSKQA------ALDRI-LQGDPV---------------RGSYHLYLSQTQ------PPTL
MKSAYENNM--------------------LGSVMT--PTMQNI----------------------------HG-RPHLA-
SAHM------------------------------PIFA-----------------VWNET--------------------
--------------
>PYHZ_scaffold_2076641_Isp
-----------------MRSSNN---------------------W-LGFSLS-NHFAFDVP-------------------
----DPSHTQ---SSSITDHSIGGTIKPE-------SM----AMDCYGQSSSDMPDMALPS-------------------
------------------DSSL---CIMEAFNRQNQAD-------------HWQASGYQQQAA------------DLSRL
A--------GGAAAAEGM---------------------------EMVNQSERE---GPK---LEDFLGAAS---G---Y
SSRGS-ERGAGLG----NVFYQQG--GGAYSRQESRINVN-VPYP------------------LQAYGMN---------S
DGSSQQYDRSELQQHHNPEN---QNLCSAV------SIHQDPGLLP----------------------------------
------------------------EGSSNPAENM------FSD-CSLQLPSQCSGQ--------DRDRI-----------
-SQLK--TWLRNP--------DGSFDGK---------SAGNGS-IKNDLS--------------------------ALAN
L---------QSLTLSMSP---------GSQ-SST----------------------------AAAAPQ-----------
-------------VLSIENSSSAA---------------EPKKRS---AGK---------------------S----GGK
EP-SPRKSLD----------------TFGQR--TSIYRGVT--------RHRWTGRYEAHLWDNSCRKEGQT-RKGRQVY
LGGYDKEEKAARAYDLAALKYWGPATTINFPLSNYEKELEEMKGMTRQEFVASLRRKSSGFSRGASMYRGVT-RHHQQGR
WQARIGRVAGNKDLYLGTFSTQEEAAEAYDIAAIKFRGINAVTNFDISRY-----DLKKICSSPSL--------------
--------------LL--------------------GDNA------KR----IRDAESV--------------------D
NSVE-----------AQRAISIDDSRQMQA--------------------SSSTAEIIPKNEQQAWNNMQQNAAKFA---
QV-------------------QQQLGWY-------------------------------------HQQQQE---------
-------QLASYQD---H---------------------HAKYAA--------------AAQ------------------
-------------------------------NMPPAVLRNLIG-------------------------------------
---LEPMSTD--DATC--------------------------------------------------SSGL----------
---------------MNGMSG---TS-TLLSN-----SGYS-----------ATAES-----------------------
-----------CKAEH-EEHSSKAS------AYESV-LHGELN---------------RGGY-LYLSH-N------SGGY
LKSPYDATI--------------------LGPIMA--PSAQPL----------------------------LG-RPSLP-
----------------------------------PMFA-----------------AWNE---------------------
--------------
>96572_Smo
--------------------------------------------------------------------------------
--------------------------------------------------------------------------------
--------------------------------------------------------------------------------
--------------------------------------------------------------------------------
--------------------------------------------------------------------------------
--------------------------------------------------------------------------------
--------------------------------------------------------------------------------
--------------------------------------------------------------------------------
--------------------------------------------------------------------------------
--------------------------------------------------------------------------------
----------------------------------------S--------RHRWTGRYEAHLWDNSCRKEGQT-RKGRQ--
-GGYDKEEKAARAYDLAALKYWGPTTTINFPLSDYEKELEEMKHMTRQEFVASLRRKSSGFSRGASIYRGVT-RHHQQGR
WQARIGRVAGNKDLYLGTFSTQEEAAEAYDIAAIKFRGINAVTNFDISRY-----DLKKICSSPSL--------------
--------------LL--------------------GETA------KR----YKDS------------------------
--------------------------------------------------------------------------------
--------------------------------------------------------------------------------
--------------------------------------------------------------------------------
--------------------------------------------------------------------------------
--------------------------------------------------------------------------------
--------------------------------------------------------------------------------
--------------------------------------------------------------------------------
--------------------------------------------------------------------------------
--------------------------------------------------------------------------------
--------------
>PYHZ_scaffold_2012953_Isp
--------------------------------------------------------------------------------
------------------------MYRKE-------TMHYD---------------------------------------
-----------------------------------------------------------------------------AR-
----------------------------------------------QVNLVEEE----PK---LEDFLGG-----A---Y
CSKD--SQETHMD----DLYYPAA--EMGVESQSSKINVN-LPYS-------Q---------GVAPSFQS----------
-FAGSVMQGGYTQAMTNSE---------EII-----PDHS----------------------------------------
---------------------------------L------MED-MEEELLPQASA-------NANALGL-----------
-SALK--TWLRHQ--------NNSDKAA---------STTSCDSPRNDVT--------------------------ALSN
L---------QSLSLSMSP---------NSL-TS---------------------------------PA-----------
-------------VQITCDDTSST---------------ESRKRN---SVK---------------------S----GNK
EP-TVRKSFD----------------TFGQR--TSIYRGVT--------RHRWTGRYEAHLWDNTCRKEGQT-RKGRQVY
LGGYDKEEKAARAYDLAALKYWGPSTTTNFPVTNYQPELEEMKNMTRQEYVASLRRKSSGFSRGASMYRGVT-RHHQQGR
WQARIGRVAGNKDLYLGTFSTQEEAAEAYDIAAIKFRGVNAVTNFDISRY-----DLKKICSSPSL--------------
--------------LM--------------------GDTA------RR-----KDSVSN--------------------N
QIGD-----------LLKGQGRDDNEGTSS--------------------------------------------------
--------------------------------------------------------------------------------
----------SYAG---H---------------------EKHYSV--------------QDQLEC---------------
-----------------------------NKKTMPMMLQNLIG-------------------------------------
---SNLYPSKQ-DG------------------------------------------------------------------
----------------NDVTVDGLTSCPLIGS-----SEVS----------LAKPFMEDR--------------------
-----------SRHEC-EDG---------------------------------------GSF-SYVGNQQQLLS-IPGN-
------------------------------GSQLP--QTFQNL----------------------------NG-RSSFT-
S-QM------------------------------P---------------------------------------------
--------------
>17087_Smo
--------------------------------------------------------------------------------
--------------------------------------------------------------------------------
--------------------------------------------------------------------------------
--------------------------------------------------------------------------------
--------------------------------------------------------------------------------
--------------------------------------------------------------------------------
--------------------------------------------------------------------------------
--------------------------------------------------------------------------------
--------------------------------------------------------------------------------
--------------------------------------------------------------------------------
-------------------------------------------------RHRWTGRFEAHLWDNTCRKEGQT-RKGRQ--
-GGYDAEEKAARAYDLAALKYWGPTTTTNFPAVEYHSKLTEMKSMSRQAFVAALRRKSSGFARGASRFRGVT-RHHQQGR
WQARIGRVAGNKDLYLGTFSTEEEAAEAYDIAAIKFRGASAVTNFDMSHY-----DLRRICSSPSL--------------
--------------LL--------------------GDTA------R---------------------------------
--------------------------------------------------------------------------------
--------------------------------------------------------------------------------
--------------------------------------------------------------------------------
--------------------------------------------------------------------------------
--------------------------------------------------------------------------------
--------------------------------------------------------------------------------
--------------------------------------------------------------------------------
--------------------------------------------------------------------------------
--------------------------------------------------------------------------------
--------------
>PQTO_scaffold_2081807_Lde
--------------------------------------------------------------------------------
--------------------------------------------------------------------------------
--------------------------------------------------------------------------------
--------------------------------------------------------------------------------
--------------------------------------------------------------------------------
--------------------------------------------------------------------------------
--------------------------------------------------------------------------------
--------------------------------------------------------------------------------
----------------MSP---------ISN-SS-----------------------------SISGA------------
-------------LQRLDALTSST---------------DIKKRI---ATK---------------------S----DGK
EP-SPRKSVD----------------TFGQR--TSIYRGVT--------RHRWTGRYEAHLWDNSCRKEGQT-RKGRQVY
LGGYDKEEKAARAYDLAALKYWGATTTINFPLSAYERELQEMGSMSRQEYVASLRRKSSGFSRGASIYRGVT-RHHQQGR
WQARIGRVAGSKDLYLGTFGTQEEAAEAYDVAAIKFKGVNAVTNFDISRY-----DLKGICSSPSL--------------
--------------RI--------------------GDAA------KRN----------------------------RKN
NAYDP----------CMDGQQKEINCKNKE--------------------------TSAIQSQFEIRKTQQRQLDFL---
EQSL---------------DADQQISWYNSK----------------------------------RQEQHG---------
-------KLGDDLDSGSL---------------------HHQNFM--------------QQA------------------
-------------------------------SMTPTTVRSLMG-------------------------------------
---FSAFYSH--------------------------------------------------------GNGI----------
----------------SSSSNDGNSTSIFLPS-----SGYS----------AIPENISKY--------------------
-----------PDTPV-QEETSKKR------SHNQS-FQGDPN----------------EDF-LYLSQK-------PTSV
FRTDYDDLM--------------------LSAGSV--PSQHPI----------------------------HE-RPRLAS
GGHM------------------------------PMFA-----------------IWNEL--------------------
--------------
>AT1G72570_AthAIL1
-----------------MK------------------------KW-LGFSLT----------------------------
------------------------------------------------------PPLRICNSE-----------------
------------EEELRHDGSDV-----------------------------WRYD-------------------DHHHH
DE------------------------------------------------------DVPK---VEDLLSNS---------
--------------------------------------------------------------------HQTEYP------
----------------------------------------------------------------INHNQTNVNCTTV---
------------------------VNRLNPPGYL------LHD-QTVVTPHYPN------NLSNDYGGF------ERVGS
VSVFK--SWLEQG-------FPLSSHYV-----------------------EAG----------------------TSNN
ISETGYNTNGSMLSLALSH---------GAC-------------------------------------------------
------------SDLINESNVSARPVKVD----------EKRKRL---------------------------V-VKPQVK
ES-VPRKSVD----------------SYGQR--TSQYRGVT--------RHRWTGRYEAHLWDNSCKKEGQT-RRGRQVY
LGGYDEEEKAARAYDLAALKYWGPTTHLNFPLSNYEKEIEELNNMNRQEFVAMLRRNSSGFSRGASVYRGVT-RHHQHGR
WQARIGRVAGNKDLYLGTFSTQEEAAEAYDIAAIKFRGLNAVTNFDINRY-----DVKRICSSSTIVD------------
------------------------------------SDQA------KHSP------------------------------
--------------------------------------------------------------------------------
--------------------------------------------------------------------------------
--------------------------------------------------------------------------------
--------------------------------------------------------------------------------
-----------------------------------------------------------------TSSGAGH--------
--------------------------------------------------------------------------------
--------------------------------------------------------------------------------
--------------------------------------------------------------------------------
--------------------------------------------------------------------------------
--------------
>MA_98095g0010_Pab
-----------------MKHMNN---------------------W-LAFSLS-PHLAIDV--------------------
---GNTTQAQAQASSNTTCYA--------------------------VNNSNEVPQSTMGYQSSAE-----------YGI
NAANGHFSSQMSELPLRSDGSL---CIMEALGRSQ--------------SANWHLKHLDASRSGSGLQSSQQLLNGTDHH
MP-------RSSQYDNNMPPQNGSE-------------------------------EGPK---LEDFLGGASLGNQ---Y
STNHETHSQASL----DGMYYAGAGF----HRE-----------------------------------HNNEKI------
--NVNLPF-----MQCRQREVPSPWIDSQSYEAQPRSLQMQQEHHDLC-------EFVQESQQMPFHVQL----------
--------------------------DPNSNDTM------FAD-CSLQLP-----------PGSGMVGL-----------
-SALK--TWLRQN--------PSNADHHK-----------------------SG------------------PGSPGKSN
LG----LGDFQSLTLSMSP---------GSQTSSAII-----------------------SQPTIIDQCNPV--------
---------------------------------------ETKKRGAGKS----------------------------GIR
EP-VPRKSID----------------TFGQR--TSQYRGVT--------RHRWTGRYEAHLWDNSCRKEGQT-RKGRQVY
LGGYDKEEKAARAYDLAALKYWGPSTHINFPLETYEKEIEEMKNMTRQEYVANLRRKSSGFSRGASVYRGVT-RHHQHGR
WQARIGRVAGNKDLYLGTFSTQEEAAEAYDIAAIKFRGISAVTNFDISKY-----DVQRICSSSTLIA------------
------------------------------------GDLA------KRTK-EIEQSSEPSGDSPLQVEA-----------
------------APLQIEAAHNSQSRSHNDNAKD-----------GNNSTSNDSNHNNNVVGSMSDKIAQDWQLM-----
--------------------------------------------------SNS------------DQDQHKVFNNWVVE-
----------------------------------HEDRKPDQSF---------------IESLQL---------------
-----------------------------GPHSHSAVLHDLIGLDSS--------------------------------T
AADSDQSNNEETSRLLT--------------------------------------------DISGGNNSL----------
-------------------------------------LTMS----------NASNTGPV---------------------
------ESPVNSASEN-EEGHHRKI-----PVYDN--MMPA------------------GEFPQALFFS-----SPQQAS
KLVKYENGST------------------TLSPWMIPPNTVQPLQS-----------------------------RPNLS-
------------------------------VGHLPMFA-----------------LWNE---------------------
--------------
>GYFU_scaffold_2027582_Phe
-----------------MFNSED--------------------------ALQ----------------------------
--------------------------------------------------------------------------------
--------------------------------------------------------------------------------
---------------------------------------------------------------ISEQSGAHKAGANV---
--------------------------------D-----------------------------------------------
--------------------------------------------------------------------------------
------------------------------------------------------------AASNTFMGV-----------
-PAIK--SWLHNR--------PENQSEMN-----------STNQAKN--------------PC---------NAAPMNAS
LQ--------SSLSLSIINPSLTNIGLVASQ---------------------------AQQHALVVSNAAHPH-------
---------HHNQLIVGNAGNSVN--------------QCSKKRGLSKS----------------------------GAK
EH-VPRKSID----------------TFGQR--TSQYRGVT--------RHRWTGRYEAHLWDNSCRKEGQT-RKGRQVY
LGGYDKEEKAARAYDLAALKYWGPSTHINFPVSTYERELDEMKNMTRQEYVASLRRKSSGFSRGASVYRGVT-RHHQHGR
WQARIGRGAG----------------------------------------------------------------------
--------------------------------------------------------------------------------
--------------------------------------------------------------------------------
--------------------------------------------------------------------------------
--------------------------------------------------------------------------------
--------------------------------------------------------------------------------
--------------------------------------------------------------------------------
--------------------------------------------------------------------------------
--------------------------------------------------------------------------------
--------------------------------------------------------------------------------
--------------------------------------------------------------------------------
--------------
>NWQC_scaffold_2161136_Pas
-----------------MRSANN---------------------W-LAFSLS-PHLTIDAPD-------H----------
---APTSQSNGPKVARHSSAEN-------------------------GMAYNGSAS-----------------------S
EFYNPGQ-SEDDGLPMRSDGSL---CIMEALSRSH--------------SGDWAQLKTGHVQR-------------SQHL
LNAELSRL--AGRAPSEQQQ-----------ISQNHY----DSI----NKSDQE--TVPK---LEDFLGGASLGG---QY
STRS----------------------------D--------------------------------SQSHNFDNLYFR---
DINVNLSPYSGGG--QQQQQQQASHVPPSFHAYGLQRTDNASSQQPYDSHSRTNTAAATAAEPNLCHPNV----------
-------HAHNLLQV-ALEQHRHP-GSGAQGGEM------LGD-CTRQLP-----------QGPNL--------------
-SALK--TWLQQS--------QAAAPS--GGVNAMGS---AGGDKQP-----VGIGKAS-IP--------------TLAN
LH--------QSLSLSMSP---------GSQ-SSNTL--------------------------QVGPQQ-----------
----------------AVQAETSP---------------ETRKRGAGRA----------------------------GSK
EA-SPRKSID----------------NFGQR--TSVFRGVT--------RHRWTGRYEAHLWDNSCRKEGQT-RKGRQVY
LGGYDKEEKAARAYDLAALKYWGANTTINFPLHQYEKEVEEMKNMTRQEYVASLRRKSSGFSRGASVYRGVT-RHHQHGR
WQARIGRVAGNKDLYLGTYSTQEEAAEAYDIAAIKFRGINAVTNFDISRY-----DTKRICGTAHNTGTGDN--NNESSA
AGVVAN--INKLPLPIAS-------------PASNYGQVV----SAKELQLVVLPEQQQP--------------------
------------QRSEVSVDQTDEDSQSLQTGNT------------------SQATDGGGLVVPRQSHLQEWQMLYQ---
QQA--------------------QRSWDDTSS----QQQQQHQ-----PQHQHHQQQQ----QHHQQQQHDARTQSLIS-
-------MADSKFQQQQDARTQSLISIAD-----SKYQQQQQDAR-------------TQSLMSMTDSKYHQHQQQQDVR
TSSLLSMSSKFRTQSL---MSMADSKYLPSSNMHSAVLRNLMGLSDG---------------G-----------------
---GSHPVNENSGGLMAMPGS----------GHGSSSNMMGSN----------------------GHGAYGGAQHSPTK-
-------------------------------------HNNS----Q--LSLRESEDDSS---------------------
----KNSGGGSAYENV-MQGDFSRH-----IMYMSHKQSPP-------------------------------HGSQNSTV
TNAGYDSSSL------------------GASSWVSPQAGINGRVNMS---------------------------------
------------------------------AGQMPIFA-----------------VWNE---------------------
--------------
>UUHD_scaffold_2017389_Ppi
--------------------------------------------------------------------------------
--------------------------------------------------------------------------------
---------------MRSDGSL---CIMEALSRSH--------------SGDWAQLKTGHVQR-------------SQHL
LNAELSRFQAGSRAPSEQQ------------ISQNQY----DSI----NKSDHE--TVPK---LEDFLGGASSLGG--QY
STRS----------------------------D--------------------------------SQTHNFENLYFR---
DINVNLSPFSGGAQQQQQQQQQASHVPPSFHAYGLQRTDNSSSQQPYDSHSRTNTAAATAAEPNLCHPNV----------
-------HAQNLLQV-ALDQHRHP-GSGAQGGEM------LSD-CTRQLP-----------QGPNL--------------
-SALK--TWLQQS--------QAGAAP--GGVNALGS---AGGDKQP-----VGVGKAS-IP--------------TLAN
LH--------QSLSLSMSP---------GSQ-SSNTL--------------------------QVGHQQ-----------
----------------TVQAETSP---------------ETRKRGAGRA----------------------------GSK
EA-SPRKSID----------------NFGQR--TSVFRGVT--------RHRWTGRYEAHLWDNSCRKEGQT-RKGRQVY
LGGYDKEEKAARAYDLAALKYWGANTTINFPLHQYEKEVEEMKNMTRQEYVASLRRKSSGFSRGASVYRGVT-RHHQHGR
WQARIGRVAGNKDLYLGTYSTQEEAAEAYDIAAIKFRGINAVTNFDISRY-----DTKRICGTVHNPGAGDT--SEIASA
AGNNSNKGVGGLP-PITN-------------QGSNYGQVL----T-KELQLVVMPEQ-----------------------
------------PRSEVSVDQTDEDSQSLQTGNT----------------NTSQGTD-GGLVVSRPSHLQEWQMLYQ---
QQT--------------------QRSWDDATS----------------QQHQHHQ----------QQQQQDARTQSLMS-
-------MADSKFQQ---------------------HHQQQHDAR-------------TQSLMSMTDSKF---QQQQDAR
T-------------------------------------------------------------------------------
--------------------------------------------------------------------------------
--------------------------------------------------------------------------------
--------------------------------------------------------------------------------
--------------------------------------------------------------------------------
--------------------------------------------------------------------------------
--------------
>Mapoly0008s0071.1_Mpo
-----------------MRSVNN---------------------W-LAFSLS-PHLTIDVPD-------H----------
---APSAQTNGPKMAQHSSAEN-------------------------GLSYNGAPS-----------------------G
ECYNLGQ-SDGDTLSMRPDGSL---CIMEALSRSH--------------SGDWAQLKTSHVQH-------------SQHL
LNADLSRL-AGSRAPSEQ-------------ITQNQY----DSLGSQSNKSDHD--SGPK---LEDFLGGASSLGG--QY
TNRS----------------------------D--------------------------------SQSHNFENLYFR---
DINVNLSPYSGGA------QQQANHVPPSFHAYGLQRTDNSSTQQPYDSHSRNNT----AAEPNLCHTNV----------
-------HAQNLLQA-ALDQHHHP---GSAQAEM------LQD-CSL--------------QSSNL--------------
-SALK--TWLRQS--------QSATGS--GGVNALGS---ADNKQQQ-----QGLGKASCIP--------------NIAG
VH--------QSLSLSMSP---------GSQ-SSNTL---------------------------VGAQPP----------
----------------NVTAETSP---------------ETRKRGAGRA----------------------------GSK
EA-SPRKSID----------------TFGQR--TSVFRGVT--------RHRWTGRYEAHLWDNSCRKEGQT-RKGRQVY
LGGYDKEEKAARAYDLAALKYWGPNTTINFPIHQYEKELEEMKNMTRQEYVASLRRKSSGFSRGASVYRGVT-RHHQHGR
WQARIGRVAGNKDLYLGTYSTQEEAAEAYDIAAIKFRGINAVTNFDISRY-----DTKKICGTAHNTADGES--------
--------------PKVQ------------------AAST------KELA-AVPPEQPSD--------P-----------
---------------SVDGHQTDEDSQSLQTGNT----------------NTSQVTDG----LVSKSHLQEWHMLYHQ--
QQT--------------------QRNWDDAN-------------------HQQ------------QQQQQAAA-------
-----------------------------------AQAQQQQDVR-------------TQSLISD---------------
--------HKF---------------QSPAGNMHSAVLRNLMGLSD----------------------------------
---AGTSGSESSGGMLAL--------------PGPSSTMMG------------------------GSSGFPGAQ------
-------------------------------------SPKSLRE-Q-----QQSEDESSKSGG-----------------
----QGGGGGSAYENF-PQGDLSRH-----ILYLSHGQSPP----------------------------------NGSAK
STNNYDNSSL------------------GNQSWMSPQGNLNQRVSAA---------------------------------
--------------------------GHLSVGHMPIFA-----------------VWND---------------------
--------------
>Pp3c9_25570V3.1_Ppa
--------------------------------------------------------------------------------
--MSQIHSSNLGGFQNSVNDCYNS-----------------------------------------------------LRN
NGDGRNKNSGHDMEMMGSEGSL---SIMEALRMSPSTDH-------------WPQTRAMQLDG--GIHQHALV--TADQL
LR---SAGKRGVGDQQMTSSQSHYD------MQNNAVETR----------------EDPK---LEDFLGGSSLGGQY---
--SNRESQQQQL----DSMYYNVGAPGSTFTRD--------------------------------------------AQS
RINVNLPYLSQPRSDTLHDVPPSFQV----------------------SYGRAPDQSCLSNPHNYEHPNTRAQLEFQEGN
LLPGTRLHPQNLLQA-TLDQ--------------SATAELLSD-CALQSPS----------GGSLNTGS----------E
DYKLK--MWLRHQ-------AAVDKRKLD---------------------------------------------------
-----GLASLQPLTLSMSS---------GSHETNISNAVQTA--------------------------------------
------------GLFLTTDCTAVA---------------EPRKRGAGRS----------------------------GRK
EP-SPRKSID----------------TFGQR--TSVFRGVT--------RHRWTGRYEAHLWDNTCRKEGQT-RKGRQVY
LGGYDKEEKAARAYDLAALKYWGPSTTINFPLGTYEKELEEMKNMSRQEYVASLRRKSSGFSRGASMYRGVT-RHHQHGR
WQARIGRVAGNKDLYLGTYSTQEEAAEAYDIAAIKFRGINAVTNFDMSRY-----NAARIQQGSLNVNH-----------
------------------------------------GLGA-----MKAAK-ETELSTTMISTPLQ-SR------------
------GQTQAA--QMIRHSQIDEDQQMCTHSTG-------------------TPGSQMTSEVLSGQSGMSKNPHEWQ--
----------------MLYQQQARNSWG----------------------SCP------------QGDSQQGWLGFGVD-
------------------------------------------------------SMRAPSTQSKF---------------
-----------------------------PAPTNGTSLRNLMG-----------------------------------LE
ALPQDRNAGAGESSCSA---------NQALMGHGMQSSSSMI-----------------------SSSGFQGGSSG----
-------------VYQDGDGRAL----------NSPPMSNSAYPQQQQQ--QQQQGSLDRGAV-DSPKNS----------
VDESEEASSKSSGYDPVLQGDLSRSG----ILY----LSPG----------------------------------SGSQG
KMANYVESS-------------------SLSPWIGSNSTTVQGLTE----------------------------RSNLS-
--------------------------MGGHMGSGPIFS----------------HSWNE---------------------
--------------
>Pp3c9_25400V3.1_Ppa
-----------------MDPFAS---------------------WKPSVGLT----------------------------
--------------------------------------------------------------------------------
--------------------------------------------------------------------------------
-------------------------------LQGTAAENC----------------EDPK---LEDFLGGASLGGQY---
--ADREAQQQQL----DSLYYSAGTTATSYVQD--------------------------------------------NQS
RINVNLPYSLQQGAGSLHDVPSSFRI----------------------AYGGVPDQSRLSSPHNYEHPHTRSQPELQGNN
LLSGTRLHPQNLMKA-TLNR--------------STTAELLSH-SALELPS----------GGSLNQNS----------E
DPGLN--MWLRHQ-------ATAEKTALT---------------------------------------------------
-----NLACLPPLTLSMSA---------GSHQSSVYSPAQTA--------------------------------------
------------GLLTTADYPTGL---------------EPRKRGAGRS----------------------------DNK
DP-SPRKSID----------------TFGQR--TSVYRGVT--------RHRWTGRYEAHLWDNTCRKEGQT-RKGRQVY
LGGYDKEDKAARAYDLAALKYWGVSTTINFTLDTYEQELEEMKNMSRQEYVASLRRKSSGFSRGASMYRGVT-RHHQHGR
WQARIGRVAGNKDLYLGTYSTQEEAAEAYDIAAIKYRGINAVTNFHISRY-----LANKIQEAAVNDH------------
--------------P---------------------GLES-----IEAAK-EGELSASVISTPLQ---------------
------YSGQAQTALMIELSQIDDDHQTTTHSTG--------------------TTELLTTEVLSGQGGISKNLHDLQ--
----------------MLYQQQARNSWG----------------------SSS------------QGDSQRGWLGFGVD-
------------------------------------------------------SMRAPNTQSKF---------------
-----------------------------PAPTSGTSLRNLMG-----------------------------------LE
AFPQDRNAGAGESSCSA---------NQALMGHGMQSSSSMI-----------------------SSSGFQGGGSG----
-------------VYQSGDGRTL----------NSPPMSNSVYP-------QQQQGSLDRGAVVDSPKNS----------
VDESEEASSKSSGYDPVLQGDLSRSG----VLY----LSPG----------------------------------SGSKG
KMASYVESN-------------------SMSPWIGSNSTTVQGLTE----------------------------RSNLS-
--------------------------MGGHMGSGPIFT----------------QSWNE---------------------
--------------
>Pp3c15_24790V3.1_Ppa
-----------------MKSMNH---------------------W-LRFSPQFPPLALDTVKQQADPISYQPRSTNSLIL
SSMSQNHSNNIGGFQNSANSCYNP-----------------------------------------------------LRS
GGDGDNSNSAQGLEMMRSDGSL---CIMEALTRSHSAEH-------------WPQQRGMQSDG--GIQQHTLL--TADQL
SR---LTRNGGAGDQQLTGSHSHYE------LQSSGTETR----------------DGPK---LEDFLGGASLGGQY---
--SDREAQQQQL----DSLYYNAGNPGASYGRD--------------------------------------------GQS
RINVNLPYSSQTGGGSLHDVPSSYHV----------------------AYGRVQDQSSLTNPQGYEHQQSRVQHELQESN
LLAGSRLHPQNLLQA-ALDQ--------------SATAELLSD-CALQLPS----------GGSPNPGS----------E
DYGLK--TWLRHQ-------AAAEKRVLN---------------------------------------------------
-----GLSGLQPLTLSMSA---------GSHQSNGSAAVHGG--------------------------------------
------------GQLPIAESPTGP---------------EPRKRGAGRA----------------------------GSK
EP-SPRKSID----------------TFGQR--TSVYRGVT--------RHRWTGRYEAHLWDNSCRKEGQT-RKGRQVY
LGGYDKEEKAARAYDLAALKYWGPNTTINFPLSTYEAELEEMKNMSRQEYVASLRRKSSGFSRGASMYRGVT-RHHQHGR
WQARIGRVAGNKDLYLGTYSTQEEAAEAYDLAAIKFRGINAVTNFDISRY-----DAGRIQQAGASGHH-----------
------------------------------------GAEA-----MKAAK-EAEVAAMQ-------SR------------
------VGATASQMHSHSQSQVNEEQQTSTHSTG-------------------GPGSQLTSEVLSGQGGLSKNLMEWQ--
----------------MLYQQQARNSWE----------------------SSS------------REESQRARLGFGVD-
------------------------------------------------------SMRAPSTQSKF---------------
-----------------------------PPPTNGMLLRNLMG-----------------------------------LE
ALPQDQNRRGGESSCSG---------NGGLLGQGMPSSGSMM-----------------------STSGFEGGGSS----
-------------AYQSGDGRAL----------NSPPMSNSAYQQQGQQGGQGGQGSVDRGAVVDSPKNS----------
VGESEEASSKSSAYDPVLQGELSRSG----ILY----MSPG----------------------------------SGSQG
KMGSYVESN-------------------PMSPWISSNAATVQGLAG----------------------------RSNLS-
--------------------------MGGHMGSGPIFA----------------HSWNE---------------------
--------------
>Pp3c15_24980V3.1_Ppa
-----------------MKSMNN---------------------W-LTFSLKSPHLALDAVKQLADPVNHQVRSTNSLIL
SSMSHNH-NSLGGYQDSANDCYNS-----------------------------------------------------LRS
SSDGGNSTSGQGLEMMRSDGSL---CIMEALSRSHSAEH-------------WPQQRGMQSDG--GIQQHTLL--TADQL
SR---LTRNGGAGDQQLTGSHSHYE------LQSSGTETR----------------DGPK---LEDFLGGASLGGQY---
--SDREAQQQQL----DSLYYNAGNPGASYGRD--------------------------------------------GQS
RINVNLPYSSQTGGGSLHDVPSSYHV----------------------AYGRVQDQSSLTNPQGYEHQQSRVQHELQESN
LLAGSRLHPQNLLQA-ALDQ--------------SATAELLSD-CALQLPS----------GGSPNPGS----------E
DYGLK--TWLRHQ-------AAAEKRVLN---------------------------------------------------
-----GLSGLQPLTLSMSA---------GSHQSNGSAAVHGG--------------------------------------
------------GQLPIAESPTGP---------------EPRKRGAGRA----------------------------GSK
EP-SPRKSID----------------TFGQR--TSVYRGVT--------RHRWTGRYEAHLWDNSCRKEGQT-RKGRQVY
LGGYDKEEKAARAYDLAALKYWGPNTTINFPLSTYEAELEEMKNMSRQEYVASLRRKSSGFSRGASMYRGVT-RHHQHGR
WQARIGRVAGNKDLYLGTYSTQEEAAEAYDLAAIKFRGINAVTNFDISRY-----DAGRIQQAGASGHH-----------
------------------------------------GAEA-----MKAAK-EAEVAAMQ-------SR------------
------VGATASQMHSHSQSQVNEEQQTSTHSTG-------------------GPGSQLTSEVLSGQGGLSKNLMEWQ--
----------------MLYQQQARNSWE----------------------SSS------------REESQRARLGFGVD-
------------------------------------------------------SMRAPSTQSKF---------------
-----------------------------PPPTNGMLLRNLMG-----------------------------------LE
ALPQDQNRRGGESSCSG---------NGGLLGQGMPSSGSMM-----------------------STSGFEGGGSS----
-------------AYQSGDGRAL----------NSPPMSNSAYQQQGQQGGQGGQGSVDRGAVVDSPKNS----------
VGESEEASSKSSAYDPVLQGELSRSG----ILY----MSPG----------------------------------SGSQG
KMGSYVESN-------------------PMSPWISSNAATVQGLAG----------------------------RSNLS-
--------------------------MGGHMGSGPIFA----------------HSWNE---------------------
--------------
>Sobic.007G056700_Sbi
-----------------MATVHPP-------------------------SPAGPT-------------------------
-----------------------------------------------------AP-------------------------
--------------------------------------------------------------------------------
--------------------------------------------------------LPPQEEEVERHVGDAVPDPPA---
---------------------------S-GEPD-----------------------------------------------
--------------------------------------------------------------------------------
------------------------------------------------------------AAGAEASGGGG---------
-AALD---------------------------------------------------------------------------
----------KQLAVVVGG-------GGGSG-------------------------------------------------
---------DERRLAGAGAVAGAV---------------AASAAAAGGG----------------------------GKL
VAEAMRK-------------------YAAPR--SSKFHGVT--------RLKWSGKYEAHLWDNTSQVKGRK-RKGKHVY
LGSYVNEEQAAKAHDLAALKYWGPNTKLNFNISDYEKEIEVMKTMSQDEFVAYIRRQSSCFSRGTSSYRGVT--RRKDGK
WQARIGRIGDTKDIYLGTFETEEEAAEAYDLAAIELRGVHAVTNFDISNY------------------------------
------------------------------------CEVG-----LRKLE------------------------------
--------------------------------------------------------------------------------
--------------------------------------------------------------------------------
---------------------------------------------------------GPSEVVNL---------------
--------------------------------------------------------------------------------
--------------------------------------------------------------------------------
-------------------------------------EGPS------------------E--------------------
--------------------------------------------------------------------------------
--------------------------------------------------------------------------------
-------------------------------------------------------VMKHAGQ------------------
--------------
>Sobic.004G237100_Sbi
-----------------MEESDVGVNPGKQM------------------GVSGDE-------------------------
---GKIERSH-------------------------------------SINLNRAPTVA----------------------
------------VEARSTQGNVETGAVVSGTKDAGTGKAEQSS----------------------GDGQE----------
--------------------------------------------------------KLPK--------------------
----------------------------CEQVD-----------------------------------------------
--------------------------------------------------------------------------------
-------------------------------------------------------------YESEIEGCVD------PVK
KAALV--TLVGNE--------------------------------------CGG----------D---------------
-----DDERVQVLTIVKKDEP-DDIGNPGTV-------------------------------------------------
----------------------AG---------------YSEVK---------------------------------GAV
GASAATSAVR----------------PAGSR--SSSFHGVT--------RHRWSGKYEAHLWDSSCRVEGRR-RKGKQVY
LGSYDTEEKAARAYDVAAIKYWGGNTRLNFPIEQYGKELEDIRDLSREECVTYLRRRSSCFSRGASIYRGVT-RRQKDGR
WQARIGLVAGTRDIYLGTFKTEEEAAEAYDIAAIEIRGKNAVTNFDRSNY------------------------------
--------------------------------------------------------------------------------
--------------------------------------------------------------------------------
--------------------------------------------------------------------------------
--------------------------------------------------------------------------------
--------------------------------------------------------------------------------
---VDKGMH--------------------------------------C--------------------------------
-------------------------------------EGEGL---------RLLASKPEE--------------------
--------------------------------------------------------------------------------
--------------------------------------------------------------------------------
--------------------------------------------------------------------------------
--------------
>MA_121578g0010_Pab
--------------------MNN---------------------W-LAFSLS-PHLAIDVS-------------------
---ASADQSAQPQQLSSVPSSFN------------------------CLQASQMPRSTLTYQS--------------YGV
NSENGGN-SFYAPMPLKSDGSF---CIMEAIGRSQ--------------IEDWHDLKPPVLQA--GRVQSPNV-------
---------MGSRLSSSDSQYE---------MAPNGTSDN----------------GSPK---LEDFLGGASLGSH--EY
STSARDHQSMSL-SLQESMYF-----------D-----------------------------------HN----------
--------------------------------------------------------------------------------
--------------------------------------------------------------------------------
---------------------------------------NSTNESHE-----------------------------SLNN
IG----DLQSQALTLTMSP---------GSQ-SSSVT-------------------------------------------
--------------IVPHSGTNAECVAVE----------TSRKRAAGSKSG--------------------------ITR
QP-VPRKSID----------------TFGQR--TSQYRGVT--------RHRWTGRYEAHLWDNSCKKEGQT-RKGRQVY
LGGYDKEEKAAKSYDLAALKYWGPSTHINFPLNTYEKELEEMKHMTRQEYVANLRRKSSGFSRGASMYRGVT-RHHQHGR
WQARIGRVAGNKDLYLGTFSTQEEAAEAYDIAAIKFRGTNAVTNFDISRY-----DVKRILASNTLLV-GES--ARLN--
--------RDQLAEPLTAE-PDQADVPIVIHQIANEKYNA------KETDYEDEDTKNN---------------------
--------------WQMQVQDQDQNQ-INSCSNE----------------------------------------------
-------------------PSDHDKIWD-------------------------------------DQKPSQSF-------
-----------------------------------------------------------TESQHL---------------
-----------------------------------AALHNLMG-------------------------------------
---LDHASTTERNG------------ESSN-----------------------------------NNNNNPLLRD-----
---------------ISASPRS---------------PGAS----------IGREEHEE---------------------
------EAAMSPNAQN-ENGLFFSS------------KQPA---------------------------------------
-----------------------LQINNALSSWMT------------------------------------QAARPAINS
MAHHI-----------------------------PMFA-----------------SWNDT--------------------
--------------
>PITA_000034650_Pta
-----------------MKYMNS---------------------W-LAFSLS-PHLAIDVS-------------------
---ASADQSAQPQQLSSVPTSFN------------------------CLQASQMPRSTLTYQS--------------YGV
NSETGGN-SFYTPMPLKSDGSL---CMMEALSRSQ--------------IEEWHDLKPPGLQA--GRVQSPNV-------
---------MGSRLSSSDSQYE---------MAPNGTSDH----------------GSPK---LEDFLGGASLGSH--EY
SASARDHQSMSL-SLQDSMYF-----------D-----------------------------------HNVGEDN--GSC
KMNVNQMPYSE-------------------------------------SSFHTYSDNGNHTYEAAMHEQG----------
-----------------LNQ-----------------PNMFAD-CSLQFNPP--------NPSSCMVGI-----------
-SAMK--TLLRQY--------PSGGSSDK----------NSTNESHE-----------------------------SLNN
IG----DLQSQALTLTMSP---------GSQ-SSSVT-------------------------------------------
--------------IVPHSGTNSECVAVE----------TSRKRAAGSKSG--------------------------NSR
QP-VPRKSID----------------TFGQR--TSQYRGVT--------RHRWTGRYEAHLWDNSCKKEGQT-RKGRQGI
VWGYDKEEKAAKSYDLAALKYWGPSTHINFPLNTYEKELEEMKHMTRQEYVANLRRKSSGFSRGASMYRGVTRRHHQHGR
WQARIGRVAGNKDLYLGTFSTQEEAAEAYDIAAIKFRGTNAVTNFDISRY-----DVKRILASNTLLV-GEM--ARLN--
--------KDQLAEPLTAEPPDQPEVPIVIHQIANEKYSA------KETDYEDEDTKNNN--------------------
------------WQMQVQVSDGDQNGHINSCSNE----------------------------------------------
-------------------PSDHGKIWDD------------------------------------DQKPNQCF-------
-----------------------------------------------------------TESQHL---------------
-----------------------------------AALHNLMG-------------------------------------
---LDHATTTERNG------------ESSN--------------------------N--------NNNNNPLLTD-----
---------------ISASPTS---------------PGAS----------MGREEHEE---------------------
----EAAAAMSPNTQN-ENGLLFSS------------KQPA---------------------------------------
-----------------------LQINNALSSWMT------------------------------------QAARPAINS
MAHHI-----------------------------PMFA-----------------SWTDT--------------------
--------------
>AT4G37750_AthANT
-----------------MKSFCDNDDNNHSN------------NL-LGFSLS-SNMMK--------MGGRG-------GR
EAIYSSSTSS------------------------------------AATSSSSVPPQLVVGDNTSNGVC--------YGS
NPNGGIY-SHMSVMPLRSDGSL---CLMEALNRSSHSNHHQD--------------------------------------
--------------------------------------------------------SSPK---VEDFFGTHHNNTS----
---HKEAMDLSL----DSLFYNTTHETTTNFQE--------------------------FFSFPQTRNHEEETRNYG---
----NDPS------------------------------------------------------------------------
----------------------------------------LTH------------------GGSFNVGV----Y------
-GEFQ---------------------------------------------------------------------------
----------QSLSLSMSP---------GSQ-SSCITGSHHHQQN-----------HQSQNHQQISEALVE---------
------------TSVGFETTTMAA---------------AKKKRGQEDVVV--------------------------VGQ
KQIVHRKSID----------------TFGQR--TSQYRGVT--------RHRWTGRYEAHLWDNSFKKEGHS-RKGRQVY
LGGYDMEEKAARAYDLAALKYWGPSTHTNFSAENYQKEIEDMKNMTRQEYVAHLRRKSSGFSRGASIYRGVT-RHHQHGR
WQARIGRVAGNKDLYLGTFGTQEEAAEAYDVAAIKFRGTNAVTNFDITRY-----DVDRIMSSNTLLS------------
------------------------------------GELA------RRNN------------------------------
--------------------------------------------------------------------------------
--------------------------------------------------------------------------------
---------------------------------------------------NSIVVRNTEDQTAL---------------
--------------------------------------------------------------------------------
--------------------------------------------------------------------------------
---------------------------------NAVVEGGS----------NKEVSTPERLL------------------
-------------------------------------SFPA---------------------------------IFALPQ
VNQKMFGSNMG-----------------NMSPWTS---------------------------------------NPNAE-
-----------------------LKTVALTLPQMPVFA-----------------AWADS--------------------
--------------
>Solyc04g077490.2_Sly
-----------------MKSMNDDSRSSNNNISNNNSAAAN-TNW-LGFSLT-PHMKMEVTNS-----------------
---SDTQHQHQFAQSFYLSS-------------------------------SPPPPMNVSTTSALC--------------
--NNPFH-STLSVMPLKSDGSL---CIMEALSRSHADAM----------------------------VQS----------
--------------------------------------------------------SSPK---LEDFLGGASMGNSQ--Y
GSHDREAMALSL----DSLYYHQNEE------E------------------------------IQVHSHHP---------
-------------------------------------------------------YYSPMHCHGMYHQET----------
---------------------------------------LLEETKPTQISN----------CEAQMTG------------
-NELK--SWGQYAQHAHINAVAAAAAAA--------------------------------------------SGGGGGTS
GC-----NELQSLSLSMNP---------GSQ-SSCVTP------------------------RQISPSGLEC--------
-------------------------VAV-----------ESKKRASGKV----------------------------AQK
QP-VHRKSID----------------TFGQR--TSQYRGVT--------RHRWTGRYEAHLWDNSCKKEGQT-RKGRQVY
LGGYDMEEKAARAYDLAALKYWGPSTHINFPLENYQKELDDMKNMTRQEYVAHLRRKSSGFSRGASIYRGVT-RHHQHGR
WQARIGRVAGNKDLYLGTFSTQEEAAEAYDVAAIKFRGVNAVTNFDISRY-----DVEKIMASNTLPA------------
------------------------------------GELA------KRTK-ERESIEYNNNTGGVGG-------------
----------------------QKNEECVD---------------NNNNGTITDWKMVLYQTSNPSLGSSYRNP------
--------------------------------------------------------------------------------
------------------------------------------------------------TSFSM---------------
------------------------------------ALQDLIG-------------------------------------
---IDSMTNSNN------------HHHATILDHEQNKIGNPF-----------------------SNAS--SLVTS----
-------------------------------------LGSS------------REASPDK--------------------
-----------------SATAASLVF-----------AKP----------------------------------------
--TKFA---------------V------PTATSVNACIPSAQL------------------------------RPIPVS-
------------------------------MAHLPVFA-----------------ALNDA--------------------
--------------
>Solyc02g092050.2_Sly
-----------------MKSLGNDDNSSNNN------------NW-LGFSLS-PHINS--------------------LE
GPLTDHHHSTQPGSSSDVQSS-----------------------IRFSPTHLNYPAMYYEGDNATL--------------
--------SSLSAMPLKSDGSL---CIMKGFNRSQQPQ---------------------------GMIS-----------
--------------------------------------------------------STPK---LEDFFGDAAMGSHH--Y
EGCNRGGMAHSL----HNIYYNQHQDETSNSQD--------------------------FLNHIQENTRHQQQ-------
--QQNYPD------------------------------------------------FSVFRGHEVYHSTEQGKTEC----
--------------------------------------------SNIQVPTL---------TGDEMSGM-----------
------NNWVSRNQNQALEQ-------------------------------MIG----------------ADNGAESGSV
GA--MTYGDFKSLSLSMSP---------GSQ-SSCVTG---------------------TQTQQISPTLTDC--------
-------------------------IAI-----------ETKKRGSEKA----------------------------NNQ
KQIVHRKSID----------------TFGQR--TSQYRGVT--------RHRWTGRYEAHLWDNSCKKEGQS-RKGRQVY
LGGYDMEDKAARSYDLAALKYWGPSTHINFPLENYQQELEEMKNMTRQEYVAHLRRKSSGFSRGASMYRGVT-RHHQHGR
WQARIGRVAGNKDLYLGTFSTQEEAAEAYDIAAIKFRGVNAVTNFDISRY-----DVERIMASNTLLA------------
------------------------------------GDLA------RRKK-ETET-------------------------
--------SKEICNQNLIANASHQGEVNIQ--------------------------------------------------
-----------------------------------------------------------------NKEENGNAVEWTMS-
--------------------------------------------------------LYQSSSPGM---------------
----------------------------DTNSMSSTMLQG---------------Q------------------------
---MDESARINT-----------------------------------------------------HLSNDSSLVTS----
-------------------------------------LGSS------------REVSPAK--------------------
-----------------NNGHLMHNF-----------AMPQ---------------------------------------
SAPKLIPSPAT-----------------NITSWIS-----------------------------------SAQLRPNV--
----------------------------------PVFA-----------------AWTDA--------------------
--------------
>scaffold00065.42_Atr
-----------------MKSMNN---------------------W-LGFSLS-PQLPLEVQ-------------------
---ADAHQSQ----------------------------------TTVPTSFFLSPHLNPS------GIC--------YGV
DAEHGGYYSQMSSMPLKSDGSL---CIMEALSRSHPE----------------------------GMVPS----------
--------------------------------------------------------SSPK---LEDFMGTQQYSHD----
----RESMALSLD---SNVYF-------------------------------------------QQNPHHENTRN-----
--AMNLQH---------------------------------------------------LRNVQFHHPSFQ---------
------------------------AICSTMGGPVAKETPLLEN-CSLQLPTMA--------------GL-----------
-SGLK--SWVRHF-------SPMDHQKMN----------------------MGG----------------DENGNGSVSS
TM---GYGDLQSLSLSMSP---------GSQ-SSCVTAPP----------------------------------------
------------QQMANNGVVECS-VAM-----------DSRKRAGGKL----------------------------VQK
QP-VHRKSIE----------------TFGQR--TSQYRGVT--------RHRWTGRYEAHLWDNSCKKEGQT-RKGRQ--
-GGYDMEEKAARAYDLAALKYWGPSTHINFALTNYQEELEEMKNMSRQEYVAHLRRKSSGFSRGASMYRGVT-RHHQHGR
WQARIGRVAGNKDLYLGTFSTQEEAAEAYDIAAIKFRGVNAVTNFDISRY-----DVERITASNTLLA------------
------------------------------------GEQA------KRIK-GRETQERETLERET---------------
--------------------------------------------------------------------------------
--------------------------------------------------HERI-----------DENQAIICRQNSVG-
--------------------------------------------------DPSIPDGSTSQASTVQKLDQK---------
--------ISY------------------RNPYLSSNLHDIVT-------------------------------------
---MDSLNSGER-----I--------------EDSNRFMSHL-----------------------SNSS--SMVTS----
-------------------------------------LGSSGGE-------DPRQGSPD---------------------
-----------------KSNGLSMIF-----------SKP----------------------------------------
---KFMGSA-------------------PISTW-----------------------------------------RPSIP-
------------------------------MAHIPVFA-----------------AWTDT--------------------
--------------
>LOC_Os03g56050_Osa
-----------------MASGNSSSSS------GSMAATA---GW-LGFSLS-PHMATYCAGGVDDVGHHHH--------
HHVHQHQQQH-------------------------------------GGGLFYNP---AAVASSFYAVV--------TSA
AGGGSYYGAGFSSMPLKSDGSL---CIMEALRGGDQEQQ--------------------------GVVVS----------
--------------------------------------------------------ASPK---LEDFLGAGP--------
------AMALSL----SAFYY-------------------------------------------GGHGHHQ---------
-----------------------------------------------------------------GHAQDGG--------
------------------------DPHHGGGGFL---------------------------QCAVIPGAGAAALVHDQ-S
AAAVA-AGWAAMH---------------------------------------GG-------------------GYDIANA
AAIIPTGGHLHPLTLSMSS-------A-GSQ-SSCVT-------------------------------------------
---------------VQAAAAGEPYMAMD----------VSKKRGGAD-RA--------------------------GQK
QP-VHRKSID----------------TFGQR--TSQYRGVT--------RHRWTGRYEAHLWDNSCKKEGQT-RKGRQ--
-GGYDMEEKAARAYDLAALKYWGPSTHINFPLEDYQEELEEMKNMSRQEYVAHLRRKSSGFSRGASIYRGVT-RHHQHGR
WQARIGRVSGNKDLYLGTFSTQEEAAEAYDVAAIKFRGLNAVTNFDITRY-----DVDKILESSTLLP------------
------------------------------------GELA------RRK----------GKVGDGGGAA-----------
------------AVADAAAALVQAGNVA-------------------------EW-KMATAAALPAAARTEQQQQ-----
------------------------------------------------HGHGG------------HQHHD--LLPS----
------------------------------------------------------------DAFSV---------------
-------------------------------------LQDIVS-------------------------------------
---TVDAAG-------------------------APPRAPHM-----------------------SMAA-----TS----
-------------------------------------LGNS------------REQSPDRGVG-----------------
-----------------GGGVLATLF-----------AKP---------------------------------------A
AASKLYSP-------------V------PLNTWASPSPAVSSV-----------------------------PARAGVS-
------------------------------IAHLPMFA-----------------AWTDA--------------------
--------------
>LOC_Os07g03250_Osa
--------------------------------------------------------------------------------
--------------------------------------------------------------------------------
--------------------------------------------------------------------------------
--------------------------------------------------------------------------------
--------------------------------------------------------------------------------
--------------------------------------------------------------------------------
--------------------------------------------------------------------------------
--------------------------------------------------------------------------------
--------------------------------------------------------------------------------
--------------------------------------------------------------------------------
--------------------------------------------------------------------------------
-----MEEKAARAYDLAALKYWGPSTHINFPLEDYQEELEEMKNMTRQEYVAHLRRKSSGFSRGASMYRGVT-RHHQHGR
WQARIGRVSGNKDLYLGTFSTQEEAAEAYDVAAIKFRGLNAVTNFDITRY-----DVDKIMASNTLLP------------
------------------------------------ADLA------RRNA------------------------------
----------ATTTSKDDHSAAGAGAIVSVHSAA----------------------DIAVADTLWKATTAPRQQ------
-----------------------------------------------------------------QQHHDDVVLSG----
---------------------------------------------------------ADQAAFSV---------------
-------------------------------------LHDLVA-------------------------------------
---VDAAAAHQQQQQQ-----------------------QHM-----------------------SMSAASSLVTS----
-------------------------------------LSNS------------REGSPD---------------------
-----------------RGGGLSMLF-----------AKPSPAVAA-----------------------------SAQQQ
ASTKLMAAP------------L------PLGSWVSSPPASAR--------------------------------PPAVS-
------------------------------IAHMPLFA-----------------AWTDA--------------------
--------------
>Sobic.002G022600_Sbi
-----------------MTNNNGNGTNAAAS------------SW-LGFSLS-PHMASAMD------EHHH---------
---VQQQQQH--------------------------HHHHSL-----------FPSVTAAAAAAYGGGV----------A
TSASPYYTPQLASMPLKSDGSL---CIMEALRRSDQPDH-----------------------------------------
--------------------------------------------------------HGPK---LEDFLGAAAAQSQ----
------AMALSLQ---SSFYYYGNGG-------------------------------------GSGHQHH----------
--------------------------------------------------------------------------------
------------------------------GGFL---------------------------PCADLYGGPSASLVADDDE
AAAAAMASWVAAR---------------------------------------AG----------------ESGGVLSAAA
AA-AGHQHHHHALALSMSS---------GSL-SSCVTAHPGAAA------------------------------------
---------ADYGVVAATASASLD---------------GGRKRGGAA-----------------------------GQK
QPVHHRKSID----------------TFGQR--TSQYRGVT--------RHRWTGRYEAHLWDNSCKKEGQT-RKGRQVY
LGGYDMEEKAARAYDLAALKYWGPSTHINFPLEDYQEELEEMKNMTRQEYVAHLRRKSSGFSRGASMYRGVT-RHHQHGR
WQARIGRVSGNKDLYLGTFSTQEEAAEAYDIAAIKFRGLNAVTNFDITRY-----DVDKIMASNTLLP------------
------------------------------------GDLA------RRRKDDDPAAVIAGADASNGG-------------
----------GVTTAAAAAALVQQAAAAAAAGAGG----------NHSASSSETWIKVAAAAALQAAGAAPRDGN-----
-----------------------------------------------------------------HHHHHHDVLSG----
------------------------------------------------------------EAFSV---------------
-------------------------------------LHDLVV------------------TA-----------------
---ADGGNGNGNGGHHHHH--V----------HNSAATAQHM-----------------------SMSSASSLVTS----
-------------------------------------LGNS------------REGSPD---------------------
-----------------RGGGLSMLF-----------SKPPAPAP------------------------------AASAH
AANKPMSPL------------M------PLGSWASTAAASARA------------------------------AAAAVS-
------------------------------IAHMPVFA-----------------AWTDA--------------------
--------------
>Sobic.001G075700_Sbi
-----------------MTSNSSQNISSCST-GGSDAAVGS--SW-LGFSLS-PHMAATMDGGAAD-GSRG---------
---VPGQQPH---------------------------------GGLC------YPPVVCSSPAPFG-----------CPA
NGGGGFY-PGLSSMPLNSDGSL---CIVEALHRSEQERH--------------------------GVM------------
--------------------------------------------------------VSPK---LEDFLGAST--------
------AMALSL----SSFYY------------------------------------------GGGHGHHAHG-------
----------------------------------------------------------------DGHGHD----------
-----------------------------QGGYL----------CAV-IPS---------SGGHDVYGG--SHLVDQQ-S
AVAMA-ESWFSAR---------------------------------------GG-------------------GYDVNGG
GA-VPLQGHTHPLALSMSS-------GTGSQ-SSSIT-------------------------------------------
------------MQVGAHADAVTEYVATD----------GSKKRGGGGGNA--------------------------GQK
QAVVHRKSID----------------TFGQR--TSKYRGVT--------RHRWTGRYEAHLWDNSCRKEGQA-RKGRQVY
LGGYDMEEKAARAYDLAALKYWGKSTHVNFPVEDYREELEEMENMTRQEYVAHLRRKSSGFSRGASIYRGVT-RHHQHGR
WQARIGRVSGNKDLYLGTFTNQEEAAEAYDVAAIKFRGLSAVTNFDITRY-----DVEKIMESNTLLP------------
------------------------------------GDQV------RRKMDGQAASAVSEADA-----------------
-------------VASATAALVQAGGRCVA----------------------DTW-KIQ-AAALPAVARGGGG-------
-------------------------------------------------GHEQ------------QQQHQD-LLSS----
------------------------------------------------------------EAFSL---------------
-------------------------------------LHDILS-------------------------------------
---VDAAGTG------------------------SGSANAHM-----------------------SNSS--SLAPS----
-------------------------------------VSNS------------REQSPDR--------------------
-----------------GSGGLAMFF-----------AKP--------------------------------------AA
AVPRLACP-------------L------PLGSWVSPSAVSS--------------------------------ARPGVS-
------------------------------IAHLPMFA-----------------AWTDA--------------------
--------------
>Sobic.001G448000_Sbi
-----------------MASGSN---------------------W-LGFSLS-PQTAVEVPSASEPPAHHAPPDP---SS
TMISSSSTNNATTSN-------------------------------FSPMAAPYPGYYCVGGAY-------------GDG
TSAAGVYYSHLPAMPIKSDGTL---CNIEGMMPS----------------------------------------------
--------------------------------------------------------SPPK---LEDFLGGGNGGGQ----
---------------ETATYYSHGQE--GASRD------------------------------YRQYQHHQ---------
--LV---------------------------------------------------------PYNFQHLTE----------
-------------------------------------AEMLQE------------------AAPMEEAM-----------
-AAAK--NFLLTS---------------------------------------YG--------------------------
--ACYSNGEMHPLSLSMMSP--------GSQSSSCVGAAPQQQL------------------------------------
------------AAVATASAAAAA----------GRSGQVGRKRGTGKG----------------------------GHK
QQPVHRKSID----------------TFGQR--TSRYRGVT--------RHRWTGRYEAHLWDNSCRKDGQT-RKGRQVY
LGGYDTEDKAARAYDLAALKYWGPATHINFPVENYRDELEVMKGMTRQEYVAHLRRRSSGFSRGASIYRGVT-RHHQQGR
WQSRIGRVAGNKDLYLGTFTTQEEAAEAYDIAAIKFRGLNAVTNFDITRY-----DVDKIMESNTLLP------------
------------------------------------AEEA------RKVK-AIEA-------------------------
-------------ANNAPMMQHNGGRELNPAEET----------------------------------------------
-----------------------SAAWR--------------------VLHGS------------PQEA-----------
--------------------------------------------------------VHCPEAVDL---------------
------------------------QRAIMSNDSQHPSLHGIVG-------------------------------------
---LDHHLGVPGKTSGSI-----------------------------------------------NFSNSSSQVTS----
-------------------------------------LGNS------------REGSPERL-------------------
---------------------------GLAMLYG---KQPSAVSLA----------------------------------
----------------------------TMSPWMPMAAQTVAQVLK----------------------------QPNV--
------------------------------VSHLPVFA-----------------AWADA--------------------
--------------
>LOC_Os04g55970_Osa
---------------MDMDTSHHY-------------------PW-LNFSLA-HH-------------------------
--------------------------------------------------------------------------------
-------------------------CEME----------------------------------------------EEER-
----------GAAAELAA--------------IAGAAP-------------------PPK---LEDFLGGGCNGG-----
--------------------------GACPPVQTTAPTAA-ELYE-------K---------FLAAGFQL---------S
GAAAP-------------------------------PVPA----------------------------------------
------------------------------------------------LLPAAAL-------------------------
--------------------------------------------EQTDET--------------------------K---
-------------QLALPP---------QA---------------------------------AVAPP------------
--------------------------------------------------------------------------------
-P-EQKKAVD----------------SFGQR--TSIYRGVT--------RHRWTGRYEAHLWDNSCRREGQS-RKGRQ--
-GGYDKEEKAARAYDLAALKYWGPSTTTNFPVAEYEKELEEMKHMTRQEFVASLRRKSSGFSRGASIYRGVT-RHHQHGR
WQARIGRVAGNKDLYLGTFGTEEEAAEAYDIAAIKFRGLNAVTNFEIGRY-----NVESIISS-NL--------------
--------------PI--------------------GSMA------GN-----RSTKAGL---------------ELAPS
SSAD-----------AIAATEANHTGVAPPS--------------------TLAFTALPMK-------------------
------------------------------------------------------------------YDQAD---------
-------YL-SYLAL-QH---------------------HQQGNL--------------QGLG-----------------
-----------------------------------------FG-------------------------------------
---LYSSGVNL-DFAN--------------------------------------------------ANG-----------
----------------NGAMSNCYTNVSLHEQ-----QQQH----------QHQHQQEQQ--------------------
-----------QDQQD-DQSQSSNN------SCGSI-PFATPIA-------------FSGSY------------------
-----ESSM-----------------------------TAAGT----------------------------FGYYPNVA-
AFQT------------------------------PIFG-----------------ME-----------------------
--------------
>Sobic.006G245500_Sbi
-----------------MDTSHHY-------------------PW-LNFSLA-HH-------------------------
---GDLEEEERGAAAELAAIA------------------------------GAAPP------------------------
--------------------------------------------------------------------------------
----------------------------------------------------------PK---LEDFLGGGVING-----
--------------------------------E-----------------------------------------------
--------------------------------------------------------------------------------
--------------------------------------------------------------SARSGGG-----------
-VPVA--APEVSA--------PAEM---------------------------------------------------YDSD
L---------KFIAAAGFL---------GGG-SAAGP--------------------------VATSPL-----------
------------------SSLDQA---------------DPKLALPAAAAA---------------------------AP
AP-EQRKAVD----------------SFGQR--TSIYRGVT--------RHRWTGRYEAHLWDNSCRREGQS-RKGRQVY
LGGYDKEEKAARAYDLAALKYWGSSTTTNFPVAEYEKELEEMKTMTRQEFVASLRRKSSGFSRGASIYRGVT-RHHQHGR
WQARIGRVAGNKDLYLGTFSTEEEAAEAYDIAAIKFRGLNAVTNFEISRY-----NVESIMNS-NI--------------
--------------PMGSM---------------SAGGRS------NKAL-ESPPSGSPD--------------------
---------------AMPVEASTAPLFAALPVKY----------------------------------------------
-----------------------------------------------------------------DQQQQDYLSM-----
------------LALQHHQ----------------------------------------QGNLQ----------------
-----------------------------------GLGFGLYSS------------------------------------
GVNLDFANSHS------------------------------------------------------TASSMTHC-------
--------------YVNGG------------------TVSS----------HEQHQHHQQ--------------------
-----------LQDHQ-QQGESETQ--QSSNSCSSL-PFATPIA-------------FNGSY------------------
------------------------------------ESSMTAAGPF------------------------GYS-YPNVA-
------------------------------AFQTPIYG-----------------ME-----------------------
--------------
>scaffold00019.292_Atr
-----------------MDCSNN---------------------W-LAFSLS-SN-------------------------
---------------------------------------------------HQTPP------------------------
----------------EPSPQL---CLLEAFNTS-----------------GW----------------------DNTHR
E--------EGSGGGDLS-------------MIASAAP--------------------PK---LEDFLGGAFSG------
--------------------------------------------------------------------HY----------
--------------------------------------------------------------------------------
--------------------------------------------------------------SGDFSG------------
--------------------------------------------------------------------------------
-------------NHARKP---------NTN-YDSDL-------------------------KSIAQGV-----------
------------------FPTSQS---------------EVEKSIL-ASDS-----------------------------
---STKKSID----------------TFGQR--TSIYRGVT--------RHRWTGRYEAHLWDNSCRREGQS-RKGRQ--
-GGYDKEEKAARAYDLAALKYWGPSTTTNFPVSNYEKELEEMKNMTRQEFVASLRRKSSGFSRGASIYRGVT-RHHQHGR
WQARIGRVAGNKDLYLGTFSTQEEAAEAYDIAAIKFRGLNAVTNFDMSRY-----DVKSIANS-NL--------------
--------------PI--------------------GGIT------NKTK-ASSESSSSDIK------------------
---------------TLETKLTDEQELSSL-----------------------SPQSEPISFAIPIKLDHDWSLMGY---
QNPS----------------------------------------------------------------------------
---------------------------------------RIEPFH--------------NVSS-----------------
-------------------------------MTSSAINEAPLT-------------------------------------
---MDFSTNSS-------------------------TY---------------------------QSNNC----------
--------------FINGGFT----------------AQQS----------L----------------------------
----------PSVTSI-DSENGKAL--------------------------------------YYLYQN-------PSSL
YRSSACENA-------------------GYGAWVA--PPLPAFPSSK---------------------------TPGLA-
LCQT------------------------------PIFG-----------------ME-----------------------
--------------
>Solyc07g018290.2_Sly
---------------MDMNSSSCE-------------------KW-LGFSLS----------------------------
----------------------------------------------------NINNLSPSTTN-----------------
------------------SSQL---SLFQAFNSNPN--------------------------------------------
---------------------------------------------TNCEVVRQNENGEPK---VENMLGSCCD-------
--------------------------------------------------------------------------------
--------------------------------------------------------------------------------
--------------------------------------------------------------------------------
--------------------------------------------------------------------------------
---------------SNTP---------TSC-EYGSE------------------------LKRIAATF-----------
------------------LPTTFS---------------DDHKEKLPLIVT-----------------------------
---QPKKPHE----------------SFGQR--TSIYRGVT--------RHRWTGRYEAHLWDNSCRRQGQS-RKGRQ--
-GGYDKEEKAARAYDLAALKYWGPTTTTNFPVSNYERELEEMKNMTRQEFVASLRRKSSGFSRGASIYRGVT-RHHQHGR
WQARIGRVAGNKDLYLGTFSTQEEAAEAYDIAAIKFRGLNAVTNFDISRY-----DVKSIASS-NL--------------
--------------PV--------------------GGMS------NKSK-SSSDETTKHVENRP---------------
---------------NLRDQDQDRDISSAP--------------------------NYTSKNLAMVNLGFGLPI------
-----------------------------------------------------------------KQDAFDFW-------
---------------------------------------SSVGYN--------------NNRS-----------------
--------------------------------------------------------------------------------
------------------------------------------------------------------KNGL----------
---------------LFQGTTMNAQGTTFFSNE----VNNS----------SVMLNEQGYD-------------------
----------NHDQQQ-QSGGSSCE---INMALNS-----------------------------------------NIAT
TSTTIDSTN--------------------FGNWMT--PSLHSFQSS----------------------------TKNDLG
PYHT------------------------------PIFG-----------------ME-----------------------
--------------
>AT5G57390_AthPLT5
-----------------MKNNNNKSSSSSS-YDSSLSPSSSSSNW-LSFSLS-NN--------------NN---------
-----------------------------------------------NFNSSSNPNLTSSTSDH----------------
--------------HHPHPSHL---SLFQAFSTSPVERQ-----------------------------------------
---------DGSPGVSPSDAT----------AVLSVYP------------------GGPK---LENFLGGGASTTTTR--
--------------------------------Q-----------------------------------------------
--------------------------------------------------------------------------------
-------------------------------------------------------------QVQSLGGV-----------
--------------------------------------------------------------------------------
-------VFSSDLQPPLHP---------PSA-AEIYDS----------------------ELKSIAASFL----------
------------GNYSGGHSSEVS---------------SVHKQQPNPLAV---------------------------SE
ASPTPKKNVE----------------SFGQR--TSIYRGVT--------RHRWTGRYEAHLWDNSCRREGQS-RKGRQVY
LGGYDKEDKAARAYDLAALKYWGPTTTTNFPISNYESELEEMKHMTRQEFVASLRRKSSGFSRGASMYRGVT-RHHQHGR
WQARIGRVAGNKDLYLGTFSTQEEAAEAYDIAAIKFRGLNAVTNFDISRY-----DVKSIASC-NL--------------
--------------PVGGLMPKPS--P---------ATAA----------------------------------------
--------ADK----TVDLSPSDSPSLTTPSLTF---NVAT------PVNDHGGTFYHTGIPIKPDPADHYWSNIFG---
FQA-----------------------------------------------------------------------------
-----------------------------------------------------------NPKAEM---------------
-----------R-------------------------------------------------------------------P
LANFGSDLHNPSPGY------------------------AIMPVMQE------------------GENNFGG--------
-------------SFVGSDGY----------------NNHS----------AASNPVSA---------------------
-------IPLSSTTTM-SNGNEGYG-------------------------------------------------------
----------------------------GNINWIN-NNISSSYQTA----------------------------KSNLS-
------------------------------VLHTPVFG-----------------LE-----------------------
--------------
>s0024.g009098_Scu
--------------------------------------------------------------------------------
--------------------------------------------------------------------------------
--------------------------------------------------------------------------------
--------------------------------------------------------------------------------
--------------------------------------------------------------------------------
--------------------------------------------------------------------------------
--------------------------------------------------------------------------------
--------------------------------------------------------------------------------
--------------------------------------------------------------------------------
--------------------------------------------------------------------------------
--------------------------MAGGR--TS-YHGVS--------RHCWYRHYRAYL----CERADKS-RKSKQ--
-GVYDDAEKAARAYDLAALRYWGPHASLNFPVEDYGNDMIQMQMMAKEEFIASLIRNSSGFAKGSSKYRGVSRRHNKNGG
WQARIKKCVGYKDIYLGTFATEEEAATAYDIVAIKFRGVKAVTNFPIHNY-----DIEAILASDCFALDKP---------
--------------PLETV-----------------SSNT----------------------------------------
--------------------------------------------------------------------------------
------------------------------------------------------V--------TIHQ-------------
--------------------------------------------------------------------------------
--------------------------------------------------------------------------------
--------------------------------------------------------------------------------
--------------------------------------------------------------------------------
--------------------------------------------------------------------------------
--------------------------------------------------------------------------------
--------------------------------------------------------------------------------
--------------
>Azfi_s0008.g011313_Afi
M----------------AGSVSN--------------------SW-LGFSLT-PQATNFTANPTSS--------------
---ANPNHSNANLSEDCFTDP---------------SSAHDI-----SATSTTNPPASSNTSQLNH--------------
------------DMVLRSDGGSL--CIMEALTRSNHADQ-------------WNNNMMKGSLMS-----------NNNNN
NNAE-PSCVDGSGGGSEENSQTLLNGGGTSCMGGPGAGQNMSNMSCKAEKDIHEN-NVPK---LEDFLGGASSLSGSRND
TSSSNSRDPANI-ENLDRIYSSSSYNGMASQSD------------APRHMN---IMDHCMVDHGESETHHGHGQLQAGSS
QIGLYMSS-SNGSSHDQHHHNHNHNI-----------------------NNTNDTTNMASSSQLAHHDYI----------
------------------------------NKYM------FTNPSNLELSSQVSSHGSGGDNNSNLLGL-----------
-SFMK--SWLRSQ--------PSGVSNSG-GSNGLLSPNNTANPSQNHSTNCHGLGSPNTNP-KDNMVQD--AGNNSCSN
IY--------QSLSLSMTP---------SSP-ANSLTMVNSSSQL-------------PTNNTTINGNNNG---------
------------DHISASSSLAIK-----DN--------NNLKRSSPSSNNSNAIVP----------IDQSGA----ATS
SSTGARKSID----------------TFGQR--TSIYRGVT--------KHRWTGRYEAHLWDNSCRREGQT-RKGRQ--
-GGYDKEEKAARAYDLAALKYWGPTTTINFPLPDYEKELEEMKNMTRQEFIASLRRNSSGFSRGASKYRGVT-RHHQHGR
WQARIGRVAGNKDLYLGTFSTQEEAAEAYDIAAIKFRGVNAVTNFDMSRY-----DIAKICSSNNL--------------
--------------PI--------------------NALA------KRIK-EETSSVLASLGPPPPPQP--MGGRHLISD
HPADIIAGAGD----QLGSLGSSSSSMYTAAGGGIH-----------EWQTLLHGYNNHNHNAMPLAAAYNNNQIAY---
NTA-----------------MTQRLLWD-------------------------------------HHKQQQ---------
---------------DQHG-------------------------------------------------------------
--------------------------------------HNLAD-------------------------------------
---MAAAAANT-------------------------TP---------------------------TYSGH----------
--------------LMQVGGG----------------GGAS----------KLFHSQASA--------------------
----------TTTTRG-GGGGGGGA-------------------------------------------------------
-----------------------------VWCWGVLVPSLVATRCF----------------------------------
----------------------------------KCIT-----------------C------------------------
--------------
>Sobic.010G215100_Sbi
-------------MDMDMSSAYPH-------------------HW-LSFSLS----------------------------
------------------------------------NYHH----------------------------------------
-------------------------GLLEAFSNSS---------------------------------------------
---------SAAPLGDEQGTVE----------------------------------ESPK---VEDFLGGVGGAGAPP--
--------------------------------D-----------------------------------------------
------------------------------------------------------------------HQLV----------
------------------------------------------------------------ELGSITAGF-----------
---------LRHY--------PAPGTTVE---------------------------------------------------
-----------------NP---------GAV-------------------------------------------------
----------------TVAAMSTD------------------------------------------------------VA
ESDQARRPAE----------------TFGQR--TSIYRGVT--------RHRWTGRYEAHLWDNSCRREGQS-RKGRQVY
LGGYDKEEKAARAYDLAALKYWGATTTTNFPVSNYEKELEEMKSMTRQEFIASLRRKSSGFSRGASIYRGVT-RHHQHGR
WQARIGRVAGNKDLYLGTFSTQEEAAEAYDIAAIKFRGLNAVTNFDMSRY-----DVDSILNS-DL--------------
--------------PVG-------------------GGAA------GRAS------------------------------
---------------KFPLDSLQPGSAAAMIAGA-------------------------ASQAMPPSEKDYWSLLAL---
HY---------------------------------------------------------------QQQQ-----------
---------------------------------------QQQQFP--------------ASAYEA---------------
-----------------YG------------------------------------------------------------S
GVNVDFTMGTSS-----------------------------------------------------HSSSN----------
-------------------------------------TGSG----------VMWGTTTGAMGQQD---------------
----------SSSSKQ-GNGYASNI--------------------------------------PYAAAA------AAMVS
GSAGYEGST--G----------------NNGTWVT-SSTSTSTAPQ----------------------------------
-------------------------------YYNYLFG------------------------------------------
--------------
>Solyc11g061750.1_Sly
------------------MNSNN---------------------W-LSFPLS-PT--------------H----------
---------------------------------------------------SSLPP------------------------
------H-LQN---AQSHHFSL---GLVNETIDNPFQN------------QEWNLM------------------------
----------NTQGSNEV----------------------------------------PK---VADFLGMNKSE------
--------------------------------------------------------------------------------
-----------------------------------------------------------NQSELIPYNDI----------
--------------------------QANDSDYL------FQN-NHL---------------------------------
MPSMQ--NALAPP--------PTNN-----------------YDLQE-----------------------------NACN
I---------QSLTLSMGS---------GKG-STSET--------------------------SASPSA-----------
---NAAT-----------ASATAE---------------NSNNTS---------------------------------IV
EA-APRRTLD----------------TFGQR--TSIYRGVT--------RHRWTGRYEAHLWDNSCRREGQS-RKGRQ--
-GGYDKEEKAARAYDLAALKYWGTSTTTNFPISNYEKELEDMKHMTRQEFVAAIRRKSSGFSRGASMYRGVT-RHHQHGR
WQARIGRVAGNKDLYLGTFTTEEEAAEAYDIAAIKFRGLNAVTNFDMNRY-----DVKAILESNTL--------------
--------------PIG-------------------GGAA------KRLK-EAQ--------------------------
---------------ALESSRKRDQEMMALNSSF-QYG------------NSNPLQAYPLMQQHQPSFDNSQPLLTL---
QNHDI-----------------------------------------------------------SQYNIQDSSSQFHQS-
------LQTQLQLQNNSHQVS------------------LYNNYL--------------QNNQ-----------------
-----------------------------------VFLHGLMN-------------------------------------
---NNEGSSSG-------------------------SY---------------------------STGGY----------
-------------------------------------FGNS----------PGLGGMSSN--------------------
-----------STSGN-NGGGGGAH--------------------------------------------------EEVAL
VKVDYDNMPS-------------------YNGWSG-ESSVQGS-------------------------------------
--------------------------------NPGVFS-----------------MWNE---------------------
--------------
>AT1G51190_AthPLT2
-----------------MNSNN----------------------W-LAFPLS-PT--------------H----------
---------------------------------------------------SSLPP------------------------
----HIH------SSQNSHFNL---GLVNDNIDNPFQN------------QGWNMINPHG--------------------
----------GGGEGGEV----------------------------------------PK---VADFLGVSKSG------
--------------------------------D-----------------------------------HHTDH-------
--------------------------------------------------------------NLVPYNDI----------
-------------------------HQTNASDYY------FQT-NSLLPTVV----------------------------
-------TCASNA--------PNN------------------YELQE-----------------------------SAHN
L---------QSLTLSMGS---------TGA-AAAEV--------------------------ATVKASP----------
------------------AETSAD---------------NSSSTTNTSGGA---------------------------IV
EA-TPRRTLE----------------TFGQR--TSIYRGVT--------RHRWTGRYEAHLWDNSCRREGQS-RKGRQVY
LGGYDKEEKAARAYDLAALKYWGPSTTTNFPITNYEKEVEEMKNMTRQEFVASIRRKSSGFSRGASMYRGVT-RHHQHGR
WQARIGRVAGNKDLYLGTFSTEEEAAEAYDIAAIKFRGLNAVTNFEINRY-----DVKAILESNTL--------------
--------------PIG-------------------GGAA------KRLK-EAQ--------------------------
---------------ALESSRKRE-EMIALGSNFHQYGAAS---------GSSSVASSSRLQLQPYPLSIQQPFEHL---
HHHQPLLTLQ---------NNNDISQY------------------------------------------HDS--------
---------FSYIQTQLH-----------------LHQQQTNNYL--------------QSSSHT---------------
--------------------------YNAYLQSNPGLLHGFVS-------------------------------------
----DNN----------------------------------------------------------NTSGF----------
--------------LGNNGIG----------------IGSS----------STVGSSAEE--------------------
----------------------------------------------------------------------------EFPA
VKVDYDMPPS--------------GGATGYGGWNS-GESAQGSNPG----------------------------------
----------------------------------GVFT-----------------MWNE---------------------
--------------
>AT3G20840_AthPLT1
-----------------MNSNN----------------------W-LGFPLS-PN-------------------------
---------------------------------------------------SSLPP------------------------
-----------------HEYNL---GLVSDHMDNPFQT------------QEWNMINPHG--------------------
---------GGGDEGGEV----------------------------------------PK---VADFLGVSKPDEN----
--------------------------------------------------------------------------------
-----------------------------------------------------------QSNHLVAYNDS----------
-------------------------------DYY------FHT-NSLMPSVQSN--------------------------
-VVVA--ACDSNT--------PNNSSY---------------HELQE-----------------------------SAHN
L---------QSLTLSMGT---------AGN-------------------------------NVVDKASP----------
------------------SETTGD---------------NASGGA--------------------------------AVV
ETATPRRALD----------------TFGQR--TSIYRGVT--------RHRWTGRYEAHLWDNSCRREGQS-RKGRQVY
LGGYDKEDKAARSYDLAALKYWGPSTTTNFPITNYEKEVEEMKHMTRQEFVAAIRRKSSGFSRGASMYRGVT-RHHQHGR
WQARIGRVAGNKDLYLGTFSTEEEAAEAYDIAAIKFRGLNAVTNFEINRY-----DVKAILESSTL--------------
--------------PIG-------------------GGAA------KRLK-EAQ--------------------------
---------------ALESSRKREAEMIALGSSF-QYGGGS---------STGSGSTSSRLQLQPYPLSIQQPLEFLS--
------------------LQNNDISHYN-------------------------------------NNNAHDSSS------
------FNHHSYIQTQLH------------------LHQQTNNYL---------QQQSSQNSQQL---------------
--------------------------YNAYLHSNPALLHGLVS-------------------------------------
TSIVDNNNNNGGSSGSY------------------------------------------------NTAAF----------
--------------LGNHGIG----------------IGSS----------STVGSTEE---------------------
-----------------------------------------------------------------------------FPT
VKTDYDMPSS--------------DGTGGYSGWTS--ESVQGSNPG----------------------------------
----------------------------------GVFT-----------------MWNE---------------------
--------------
>MA_86195g0010_Pab
-----------------MGSVNN---------------------W-LGFSLS-PNMTVE---------------------
--LQDSSQSQSASAVTVATSSMV----------------HSSSRDCFSHNAHQAPP-------------P----------
----PMH-MHIPEMTLRSDGSL---YILDSINRSQN--------------EDWHLKNLEQTRS------------SQQHL
I---------SADLSMLVGGRS---------MCSDSRY-------TNNNNRRHDG-EGPK---LEDFLGGASLGGG--QY
SESRTSQPSANLN----DMYGTAAPSKSSFMSDSARLNCF----------------------------HA----------
DIS------ELSATNSSKRSDDQHSI-------KAESLSGVSAIHS-------------NLRDSYDHNS-----------
------------------------------NEYI------FPE-CTLQLPQTSGV------NNNNINGL-----------
-SMIK--TWLRTQ--------PTSSSAESYGNGASCSTTTTATNPEQPKEG-------------------------TLTN
I---------QSLKLSMSP---------TSQ-STTSL--------------------------AIVPAA-----------
-------------TQNGTLDTSLP---------------DSKKRLIPDKPT---------------------------TS
EP-ATRKSID----------------TFGQR--TSIYRGVT--------RHRWTGRYEAHLWDNSCRREGQT-RKGRQVY
LGGYDKEEKAARAYDLAALKYWGPTTTTNFPISNYEKELEEMKHMTRQEYVASLRRKSSGFSRGASMYRGVT-RHHQHGR
WQARIGRVAGNKDLYLGTFSTQEEAAEAYDIAAIKFRGLNAVTNFDMSRY-----DVKSILASSTL--------------
--------------PV--------------------GGHV------KRIK-EAEP-------------------------
--SDP----------SVDGRRNDEDSSTLS-----------------------SYATSNYSNATNSKTGHEWPLIAF---
QNHA----------------NQQRGMWCKQE---------------------------------VQQNQPQ---------
-----------DFQVQLHSL-------------------HNQKFF--------------QPSL-----------------
------------------------------MTTNATVLHNLMT-------------------------------------
---LQESPSVDSNSAG-------------------------------------------------STSGL----------
--------------FTNISANNLAGSGLLMASNTPT-MHQS----------MGATDNQTNR-------------------
----------VSFGQS-EQGSLKGN-----SAYESMNLYGDPY--------------SRGVY--YLPQQQQQQQIATGTV
KAGNYDSNAA------------------AYNNWMT-TAPAQALAQ-----------------------------RPNGLT
VCHA------------------------------PIFS-----------------IWNDS--------------------
--------------
>scaffold00066.6_Atr
-----------------MSSSIN--------------------NW-LGFSLS-PQQQQQQQ-------------------
---QSSDHSQS-------------------------QHHHSG----FASSFNNNNDLSVSGEGGDC-----MGLGG----
--------GDSQTTLSRPDGPF---GILEALNRPHQ-------------NQDWSVKSLSVG--------------DSS--
-------CYGGGGGGTTTNVIA---------------------------RQHQDGVGRPK---LEDFLGGASLGGG----
--------------------------------------------------------------GGGSTTHY----------
---------TGGGENNNNNNN-----------------------------------------------------------
--------------------------------------MLFSMDCSLQLPSNGNG-----SSSSSMLGL-----------
-SMIK--TWLRNQ--------PHSSSTEN------------------------------------------DGGGAAVSN
TH--------QTLSLSMGT---------GGG-STHHQQQQGPI--------------------QIPLPLPAP--------
------------MAVPGESSSSDN---------------NVKQQKPPPLDQ---------------------A----GAI
EP-VPRKSID----------------TFGQR--TSIYRGVT--------RHRWTGRYEAHLWDNSCRREGQT-RKGRQ--
-GGYDKEEKAARAYDLAALKYWGTTTTTNFPISNYEKEVEEMKHMTRQEYVASLRRKSSGFSRGASIYRGVT-RHHQHGR
WQARIGRVAGNKDLYLGTFSTQEEAAEAYDIAAIKFRGLNAVTNFDMSRY-----DVNSIMESSTL--------------
--------------PI--------------------GGAA------KRLK-ESSDQTTNHPMPLP---------LPLPLG
ESTMPMMPMAMPLPMSMRRATDEDNIISMA---------------------NAAASHMTTNEGIATAAGYGWPILGF---
HHQPL-TTQHFPYSHS--QNPQQRGGWCKSER----Q----------------------------QHEESNSN-------
-------SNSSNIMQEAHQLHLG------------GGSNNTHNFL--------------QQQA-----------------
-----------------------------------SVLHNLIS-------------------------------------
---LDSPSSFD-QTSA--------------------------------------------------SNSI----------
---------------IYTGSSGYQLGGPIGTTIIP--TGVN----------PHVADH-----------------------
-----------HQGSL-GEGETKQL-GFYENGYLS--VAADPY--------------SAGARNVYYLQQNQ-----SKAN
NNGNYDDDSHH-----Q-------TNNNNISSWMIPTTSLQALAPT-------------------------RS-SSNLAA
VCHAT-----------------------------PIFS-----------------VWNDT--------------------
--------------
>Solyc11g008560.1_Sly
----------------MASSMNN---------------------W-LGFSLS-PHEEVLTSQQS----SHQEC-------
FDLLTSHHHQ---------------------------QHHD-------QSTVVLPSL-----------------------
---------NV---VPHDNTPF---GIFEAFNRNHHQS------------QDWN---------------------DTNYK
T---------TSNMSMLMG--------------------------SQHLENNQEP---PK---LENFLG-----------
--------------------------------------------------------------------------------
-I-EQKLQQVCNNNNNNNNNNNYYNI-------------------------------YCSTPNNISENN-----------
--------------------------------------------------------------ANNIIGL-----------
-SMIK--NWLRNN--------PNST------------TTTP-SSLQDDKKEVVGVA----------------GGGGNGNN
A---------RSLSLSMSM---------GGD-GGGD--------------------------------------------
------------------NSCSSE---------------NNKQEIVSGNNDG--------------------Q----ISG
AIVVPKKSID----------------TFGQR--TSIYRGVT--------RHRWTGRYEAHLWDNSCRREGQT-RKGRQVY
LGGYDKEEKAARAYDLAALKYWGPTTTTNFPISNYEKELEEMKHMTRQEYVASLRRKSSGFSRGASIYRGVT-RHHQHGR
WQARIGRVAGNKDLYLGTFSTQEEAAEAYDIAAIKFRGLNAVTNFEINRY-----DVKSILESSTL--------------
--------------PI--------------------GGAA------KRLK-DVEQAEI----------------------
---------------ALDYQRASQENIGTT--------------------------HLMNGSMSAYGAGHCWPNITL---
QQAQPLSAMH--YSNP---YNSQQRLWC-------------------------------------KQEVQD---------
-----------------HDL-------------------TSQNFQ--------------DFQLG----------------
-----------------------------------NAHNYLMG-------------------------------------
---LDNSSSSS--------------------------M---------------------------EQNNVTYHQ------
-------GV----GYASNNNNHHGGGGFVLPH-----LNGS----------SSYGGENDN--------------------
-----------EVKQL-QLGTHENI---------------------------------FGNY--YHSQPATSND--SIKV
SNTLYDHQES----------------VCNSNNWMS-TAVPMALAS-----------------------------RTSTAA
ICHGV----------------------------APTFT-----------------MWNDS--------------------
--------------
>AT5G17430_AthBBM
-----------------MNSMNN---------------------W-LGFSLS-PH-------------------------
----DQNHHRTDVDSSTTRTA----------VDVAG-YCFD--ESS-AVQTSFLSPFG----------------------
-------------------------VTLEAFTRDNNSHS-----------RDWDIN------------------------
----------GGACNNINN-------------------------------NEQNG---PK---LENFLGRTTTI------
--------------------------------------------------------------------YNTNETVVD---
---------GNGDCGGGDGG------------------------------------------------------------
--------------------------------------------------------------GGGSLGL-----------
-SMIK--TWLSNH--------SVAN-----------------ANHQD-----------------------------NGNG
A---------RGLSLSMN--------------------------------------------------------------
------------------SSTSDS---------------NNYNNNDDVVQEKTI--------------------VD--VV
ET-TPKKTIE----------------SFGQR--TSIYRGVT--------RHRWTGRYEAHLWDNSCKREGQT-RKGRQVY
LGGYDKEEKAARAYDLAALKYWGTTTTTNFPLSEYEKEVEEMKHMTRQEYVASLRRKSSGFSRGASIYRGVT-RHHQHGR
WQARIGRVAGNKDLYLGTFGTQEEAAEAYDIAAIKFRGLSAVTNFDMNRY-----NVKAILESPSL--------------
--------------PI--------------------GSSA------KRLK-DVNN-------------------------
------------PAMMISNNVSESANNVSGWQNT-----------------------------------------AF---
QHHQG------------------------------------------------------MDLSLLQQQQERYVGYYNGG-
--------------------NLSTES--------FKQEEEQQHFLR-------------NSPSHM---------------
--------------------------------------------------------------------------------
-TNVDHHSSTSDDSVTVCGNVV-------------------------------------------SYGGYQGFAIP----
-------------------------------------VGTS---------------------------------------
------------------------------------------------------------------------VNYDPFTA
AEIAYNARNHY---YAQ-------------------HQQQQQIQQSP---------------------------FPVAIS
NNHSSN----------------MYFHGEGGGEGAPTFS-----------------VWNDT--------------------
--------------
>LOC_Os01g67410_Osa
-----------------MATMNN---------------------W-LAFSLS-PQ-------------------------
---------------------------------------------------DQLPP------------------------
---------------SQTNSTL---ISAAATTTTAGDSSTGDVCFN--IPQDWSMR------------------------
----------GSELSALVA--------------------------------------EPK---LEDFLGGISFS------
----------------------------------------------------------------EQQHHHGGKG------
---GVIPS-SAAACYASSGSSVGY----------LYPPPSSSSLQFAD------SVMVATSSPVVAHDGV----------
-----------------------------SGGGM------VSA-AA--------AAAAS---GNGGIGL-----------
-SMIK--NWLRSQ--------PAP------------------QP------------------------------------
A---------QALSLSMNM---------AGT-TT----AQGG---GAMALLAGERGRTTPASESLSTSA-----------
---HGA------------TTATMA---------------GGRKEINEEGSGSA-----GAVVAVGSESGGSGAVVEAGAA
AA-AARKSVD----------------TFGQR--TSIYRGVT--------RHRWTGRYEAHLWDNSCRREGQT-RKGRQVL
IGGYDKEEKAARAYDLAALKYWGPTTTTNFPVNNYEKELEEMKHMTRQEFVASLRRKSSGFSRGASIYRGVT-RHHQHGR
WQARIGRVAGNKDLYLGTFSTQEEAAEAYDIAAIKFRGLNAVTNFDMSRY-----DVKSILDSAAL--------------
--------------PV--------------------GTAA------KRLK-DAEAAA-----------------------
-AYDVG---------RIASHLGGDGAYAAHYGH--HHH----------------------------SAAAAWPTIAF---
QAAAAPPPHAAGLYHP---YAQPLRGWC-------------------------------------KQEQDH-------A-
------IAAAHSLQ-DLHHLNL-------------GAAAAAHDFF--------------SQAMQ----------------
------------------------------------QQHGLGS-------------------------------------
---IDNASLEH-------------------------ST---------------------------GSNSVVYN-------
-------G-------DNGG----GGGGYIMAPMSAV-SATA----------TAVASSH----------------------
-----------------DHGGDGGK--QVQMGYDSYLVGADAYGG-----------GGAGRM------------------
------------------------------PSWAM-TPASAPAATS----------------------------SSDMTG
VCH-----------------------------GAQLFS-----------------VWNDT--------------------
--------------
>Sobic.003G390600_Sbi
-----------------MATVNN---------------------W-LAFSLS-PQ-------------------------
----------------------------------------------------ELPP------------------------
---------------TQTDSTL-----ISAATTDDVSG---DVCFN--IPQDWSMR------------------------
----------GSELSALV--------------------------------------AEPK---LEDFLGGISFSEQ----
--------------------------------------------------------------------HHKANC------
---NMIPSTSSTACYASSGATAGYHH-------QLYHQPTSSALHFAD------SVMVASSA------------------
-------------------------GGVHDGGAM------LSA-ASANGSAGAGAASA---NGSGSIGL-----------
-SMIK--NWLRSQ--------PAPMQPRV-----------------------------------------------AAES
V---------QGLSLSMNM---------AGA-TQGAA---------GMPLLAGERG---RAPESVSTSAQG---------
----GAVV-------------------------------TAPKEDSGGSGVAAT----GALVAVSTDTGGS------GAS
ADNTARKTVD----------------TFGQR--TSIYRGVT--------RHRWTGRYEAHLWDNSCRREGQT-RKGRQVY
LGGYDKEEKAARAYDLAALKYWGPTTTTNFPVNNYEKELEDMKHMTRQEFVASLRRKSSGFSRGASIYRGVT-RHHQHGR
WQARIGRVAGNKDLYLGTFSTQEEAAEAYDIAAIKFRGLNAVTNFDMSRY-----DVKSILDSSAL--------------
--------------PI--------------------GSAA------KRLK-EAEAAASAQ---------------HHAGV
VSYDVG---------RIASQLGDGGALAAAYGAH-YHG--------------------------------AWPTIAF---
QPSAA-----TGLYHP---YAQPMRGWC-------------------------------------KQEQDHAV-------
------IAAAHSLQ-ELHHLNL-------------GAAAGAHDFF--------------SAGQQA---------------
------------------------------------AMHGLGS-------------------------------------
---MDNASLEHST----------------------------------------------------GSNSVVYNGVG----
---------------DSNGSTVVGSGGYMM-PMSAA-TATA----------TTAMVSHEQVHAR----------------
-----------------AQGDHHDEAKAAQMGYESYLVNAENYGG--------------GRM------------------
-----------------------------SAAWAT--VSAPPAASS----------------------------NDNMAD
VGHG----------------------------GAQLFS-----------------VWNDT--------------------
--------------
>LOC_Os11g19060_Osa
-----------------MASITN---------------------W-LGFSSS-SF-------------------------
---SGAGADP--------------------------------------------PPL-----------------------
--------------------------------------------------QEWG--------------------------
-----SAYEGGGTVAAAGGEET----------------------------------AAPK---LEDFLGMQVQQ------
--------------------------------E-----------------------------------------------
-----------------------------------------------------------TAAAAAGHGRG----------
-------------------------------------------------------------GSSSVVGL-----------
-SMIK--NWLRSQ--------PPPAVV-------------------------------------------------GGED
AM--------MALAVSTSA---------SPP-VDATV-------------------------------------------
----------------PACISPDG---------------MGSKAADGGGAAEAA-----------------------AAA
AAQRMKAAMD----------------TFGQR--TSIYRGVT--------KHRWTGRYEAHLWDNSCRREGQT-RKGRQVN
AGGYDKEEKAARAYDLAALKYWGTTTTTNFPVSNYEKELDEMKHMNRQEFVASLRRKSSGFSRGASIYRGVT-RHHQHGR
WQARIGRVAGNKDLYLGTFGTQEEAAEAYDIAAIKFRGLNAVTNFDMSRY-----DVKSIIESSNL--------------
--------------PIG-------------------TGTT------RRLK-DSSDHTDNVMD----IN------------
--------------VNTEPNNVVSSHFTNGVGNYGSQHYGY------------NGWSPISMQPIPSQYANGQP-------
------------------------RAWL-------------------------------------KQEQDSSV-------
----------------------------------------------------------VTAAQNL---------------
--------------------------HNLHHFSSLGYTHNFFQQSDVPDVTGF---------------------------
---VDAPSRSSDSYSF---------------------------RYN-------------------GTNGFHGLPGG----
-------------------------------------ISYA----------MPVATAVDQGQGIHGYGE-----------
-----DGVAGIDTTHD-LYGSRNVY------------------------------YLSEGSL-------------LADVE
KEGDYGQSV-------------------GGNSWVL-----------------------------P---------TP----
--------------------------------------------------------------------------------
--------------
>LOC_Os02g40070_Osa
-----------------MASANN---------------------W-LGFSLS-GQ-------------------------
---ENPQPHQDSSPPAA--------------IDVSG-----------AGDFYGLPTSQPTAADAH------LGVAG----
---------------HHHNASY---GIMEAFNRGAQEA------------QDWNMRGLDYN----G--------------
---------GASELSMLVGSS-----GGKRA---AAVEE-----------------TEPK---LEDFLGGNSFVSE----
-------------------------------QD-----------------------------------------------
------------------------------------------------------------------HHAA----------
------------------------------GGFL------FSG-VPMASS------TNSN-SGSNTMEL-----------
-SMIK--TWLRNNQVPQPQQ-PAAAAAAA----------QQAHEAAEMSTD----ASASSFGCSDAMGRSNNGGAVSAAA
GG-----TSSQSLALSMST---------GSH-----------------------------SHLPIVVAGGG---------
-------------NASGGAAESTS---------------SENKRASGAMDSP-------------------------GGA
IEAVPRKSID----------------TFGQR--TSIYRGVT--------RHRWTGRYEAHLWDNSCRREGQS-RKGRQ--
-GGYDKEDKAARAYDLAALKYWGTTTTTNFPISNYEKELDEMKHMTRQEYIAYLRRNSSGFSRGASKYRGVT-RHHQHGR
WQARIGRVAGNKDLYLGTFSTEEEAAEAYDIAAIKFRGLNAVTNFDMSRY-----DVKSILESSTL--------------
--------------PV--------------------GGAA------RRLK-EAADHAEAA--------------------
------------GATIWRAADMDGAGVISGLADVGMGAYAASY-----------------------HHHHGWPTIAF---
QQPPPLAVHYP-YGQA---PAAPSRGWC-------------------------------------KPEQDAAV-------
-------AAAAHSLQDLQQLHLGS--------------AAAHNFF------------QASSSSTV---------------
-----------------YN--GGGGG-----------YQGLGG--NAFLMPAST-------------------------V
V--ADQGHSSTATNHG-------------------------------------------------NTCSYGNEEQG-KL-
------IGY----------------------------DAMA----------MASGAAGG---------------------
------------GYQL-SQGSASTV---------------------------------------------------SIAR
-ANGY------------------------SANWSSPFNGAMG--------------------------------------
--------------------------------------------------------------------------------
--------------
>Sobic.004G214300_Sbi
-----------------MASTNN--------------------HW-LGFSLS-GQ-------------------------
---DNPQPNHQDSSPAAAG------------IDISG-----------ASDFYGLPTQQGSDGN--------LGVPGL---
---------------RDDHASY---GIMEAFNRVPQET------------QDWNMRGLDYN----G--------------
---------GGSELSMLVGSSGGGGGGGKRA-----VED-----------------SEPK---LEDFLGGNSFVSE----
--------------------------------------------------------------------------------
------------------------------------------------------------------HDQS----------
------------------------------GGYL------FSG-VPMASS------TNSN-SGSNTMEL-----------
-SMIK--TWLRNNQVPQPQ--PPAAP-------------HQAPQTEEMSTD----ASASSFGCSDSMGRN---GTVAAAG
SS--------QSLALSMST---------GSH-------------------------------LPMVVAGGG---------
--------------ASGAASESTS---------------SENKRASGAMDSP-------------------------GSA
VEAVPRKSID----------------TFGQR--TSIYRGVT--------RHRWTGRYEAHLWDNSCRREGQS-RKGRQ--
-GGYDKEDKAARAYDLAALKYWGTTTTTNFPISNYEKELEEMKHMTRQEYIAYLRRNSSGFSRGASKYRGVT-RHHQHGR
WQARIGRVAGNKDLYLGTFSTEEEAAEAYDIAAIKFRGLNAVTNFDMSRY-----DVKSILESSTL--------------
--------------PV--------------------GGAA------RRLK-DAVDHVEAG--------------------
--------------ATIWRADMDGG-VISQLAEAGMGGYAS-------------------------YGHHAWPTIAF---
QQPSPLSVHYP-YGQP------PSRGWC-------------------------------------KPEQDAAV-------
-------AAAAHSLQDLQQLHLG---------------SAAHNFF------------QASSSSAV---------------
-----------------YN--SGGGG------ASGGYHQGLGGGSSSFLMPSST-------------------------V
VAGADQGHSSSTANQG-------------------------------------------------STCSYGDDHQEGKL-
------IGY----------------------------DAMV----------AATAAGGD---------------------
-----PYAAARSGYQFSSQGSGSTV---------------------------------------------------SIAR
-ANGY------------------------SNNWSSPFNGGMG--------------------------------------
--------------------------------------------------------------------------------
--------------
>LOC_Os04g42570_Osa
-----------------MASADN---------------------W-LGFSLS-GQ-------------------------
---GNPQH-HQNGSPSAAGDAA---------IDISG-----------SGDFYGLPTPDA----HH------IGMAG----
-----------------EDAPY---GVMDAFNRGTHET------------QDWAMRGLDYG----G--------------
---------GSSDLSMLVGSS----GGGRRTVAGDGVGE-----------------A-PK---LENFLDGNSFSDV----
--------------------------------------------------------------------------------
------------------------------------------------------------------HGQ-----------
----------------------------AAGGYL------YSG-SAVGGAG---GYSNGG-CGGGTIEL-----------
-SMIK--TWLRSN---QSQQ-QPSPPQH-------------ADQG--MSTD----ASASSYACSDVLVGS---GGAGGTA
-S-----SHGQGLALSMST---------GS----------------------------------VAAAGGG---------
--------------GAVVAAESSS---------------SENKR----VDSP-G-----------------------GAV
DGAVPRKSID----------------TFGQR--TSIYRGVT--------RHRWTGRYEAHLWDNSCRREGQS-RKGRQVC
VGGYDKEDKAARAYDLAALKYWGTTTTTNFPMSNYEKELEEMKHMTRQEYIAHLRRNSSGFSRGASKYRGVT-RHHQHGR
WQARIGRVAGNKDIYLGTFSTEEEAAEAYDIAAIKFRGLNAVTNFDMSRY-----DVKSILDSSTL--------------
--------------PV--------------------GGAA------RRLK------------------------------
-------------EAEVAAAAAGGGVIVSHLADGGVGGYYYG-CG---------------------------PTIAFGGG
QQPAPLAVHYPSYGQA--------SGWC-------------------------------------KPEQDAVI-------
--------AAGHCATDLQHLHLGS-----------GGAAATHNFF-----------QQPASSSAV---------------
-----------------YGNGGGGGG-------------------NAFMMPMGA-------------------------V
VAAADHGG---------------------------------------------------------QSSAYGGGDESGRLV
------VGY----------------------------DGVV---------------------------------------
----DPYAAMRSAYEL-SQGSSSSS--------------------------------------------------VSVAK
AANGY------------------------PDNWSSPFNGM----------------------------------------
---------------------------------------------------G----------------------------
--------------
>Sobic.001G392700_Sbi
-----------------MSPPTNGAI-----------------------SLA----------------------------
-----------------------------------------------------APS------------------------
-------------SMMLGAGGL----------------------------------------------------------
--------------------------------------------------------TNPPGFTDEDFLAADAALLGGA--
--------------------------------D-----------------------------------------------
--------------------------------------------------------------------------------
-----Q--------------------------------------TLLLLPS---------GGSSAAQGLG----------
-AALA-------------------------------------------------------------------CGEVTTAV
AA--------GSISLAGQP-------APGQQ-------------------------------------------------
-------VL---WEVMTAVAEDCN-----------------------------------------------------ANF
SPSPPSPALP----------------TTSHR--TSIYRGVT--------RHRWTGRYEAHLWDNTCRKEGQK-RKGRQVY
LGGYDKEDKAARAYDIAALKYWGDNATTNFPRENYIREIQDMQNMNRRDVVASLRRKSSGFSRGASIYRGVT-RHHQHGR
WQARIGRVAGNKDLYLGTFATEQEAAEAYDIAALKFRGENAVTNFEPSRY-----NLLAIAQRE------------I---
--------------PIL-------------------GKKL-----VQKPAPEAEDQAARSAP------------------
---------------SFSHSQQSSNSLPPYFLTN--------------------------LEPLPSQPSLAQPLPSYDFG
EPPSF--------------YRPCPCPWG----------------------------------------------------
-----------------------------------------------------------NPEQKV---------------
-----------------------------QLGRKMEIVNGLMQ-------------------------------------
--------------------------------------------------------------------------------
-------------------------------------LGNS---------------------------------------
--------------------------------------------------------------------------------
--------------------------------------------------------------------------------
-------------------------------------------------------AAN----------------------
--------------
>AT5G10510_AthPLT3
----------------MMAPMTN---------------------W-LTFSLS-PM-------------------------
EMLRSSDQSQ---------------------------VSYDA-----SSAASSSPYLLDNFYGWS---------------
--------NQKPQEFFKEEAQL---AAAASMADSTILTTFVDP--------------------------------QSHHS
QN------------------------------------------------------HIPK---LEDFLGDSSSIVR--S-
DNQTDTQD-SSL----TQIY------------D-------------PR--------------------HH----------
--------------------------------------------------------HNQTGFYSDHH--D----------
------FKTMAGFQS---------AFSTNSGSEV-------DD------------------S--ASIGR-----------
-THLA-GDYLGHV-------VESS-GPE--------------------------------------------LGFHGGST
----------GALSLGVNVN--NNTNHRNDN-DNHYRGNNNG--------------------------------------
---------ERINNNNNNDNEKTD---------------SEKEKAVVAVETSDC--------------------------
---SNKKIAD----------------TFGQR--TSIYRGVT--------RHRWTGRYEAHLWDNSCRREGQA-RKGRQVY
LSGYDKEDKAARAYDLAALKYWNATATTNFPITNYSKEVEEMKHMTKQEFIASLRRKSSGFSRGASIYRGVT-RHHQQGR
WQARIGRVAGNKDLYLGTFATEEEAAEAYDIAAIKFRGINAVTNFEMNRY-----DVEAIMKSA------------L---
--------------PI--------------------GGAA------KRLK------------------------------
--------------LSLEAAASSEQK------------------------------------------------------
----------------------------------------------PILGHHQL--------HHFQQQQQQQQL------
------------------------------------------------------QLQSSPNHSSI-------NFCPNSAQ
SQQIIPCGIPFEAAALYHH------HQQQQQHQQQQQQQNFFQHFPANA-------------------------------
--------------------------------------------------------------------------------
-------------------------------------ASDS----------TGSNNNSN---------------------
-----------------VQGTMGLM-------------------------------------------------------
--------------------------------------------------------------------------APNPA-
----------------------------------------------------EFFLWPNQSY------------------
--------------
>AT5G65510_AthPLT7
-----------------MAPPMTN--------------------C-LTFSLS-PM-------------------------
EMLKSTDQSH--------------------------SSSYDD---------SSTPYLIDNFYA-----------------
---------------FKEEAEI--EAAAASMADSTTLSTFFD------------------------------------HS
QT------------------------------------------------------QIPK---LEDFLGDSFVRYS----
DNQTETQDSSSL----TPFY------------D-------------PR--------------------HRTVA-------
--------------------------------------------------------EGVTGFFSDHHQPD----------
------------------------FKTINSGPEI------FDD------------------STTSNIGG-----------
-THLS---------------VESSTTAK--------------------------------------------LGFNGDCT
TT--------GVLSLGVNNTSDNNG-ERGGN-------------------------------------------------
---------------------------------------SNKKKTVSKKETSDD--------------------------
---SKKKIVE----------------TLGQR--TSIYRGVT--------RHRWTGRYEAHLWDNSCRREGQA-RKGRQVY
LGGYDKEDRAARAYDLAALKYWGSTATTNFPVSSYSKELEEMNHMTKQEFIASLRRKSSGFSRGASIYRGVT-RHHQQGR
WQARIGRVAGNKDLYLGTFATEEEAAEAYDIAAIKFRGINAVTNFEMNRY-----DIEAVMNSS------------L---
--------------PVG-------------------GAAA------KRHK------------------------------
------------LKLALESPSSSSSD------------------------------------------------------
--------------------------------------------------------------HNLQQQQ-----------
---------------------LLP-----------------------------SSSPSDQNPNSI---------------
-----PCGIPFEPSVLYYH-------------------QNFFQHYPL---------------------------------
--------------------------------------------------------------------------------
-------------------------------------VSDS---------------------------------------
--------------------------------------------------------------------------------
--------------------------------------------------------------------------------
------------------------------TIQAPMNQ-------------AEFFLWPNQSY------------------
--------------
>Solyc05g051380.2_Sly
-----------------MAPENNN--------------------W-LSFSLS---------------------------S
MEMLNSSSSS----------------------------------------------------------------------
------------SSMLQSNAPS---------APTHQYYFADNF-----YPHGWMN-------------------------
-----HELMYSGDEKQIYHPNV--------------------FIDSQIIHHQHHHHPPPK---LEDFFGGETET------
------QDSSSL----THIY------------D-----------------------------------HH----------
------------------------------------------------------------------HHHG----------
------------------------GAAAGDGGYF---------------------------YSIAVGGF-----------
--------------------------------------------------------------------------------
----------QTLPTNSGSEV-DDSQVMGSEFATESSNE-----------------YPPIITLGVNNNSNT---------
---------------------------------------NSEKAIVTAVNSE----------------------------
---GCKKITD----------------TFGQR--TSIYRGVT--------RHRWTGRYEAHLWDNSCKREGQA-RKGRQ--
-GGYDKEDKAARSYDLAALKYWGTTATTNFPASDYTKEIEEMKHMTKQEFIASLRRKSSGFSRGASMYRGVT-RHHQQGR
WQARIGRVAGNKDLYLGTFATEEEAAEAYDIAAIKFRGLNAVTNFEMNRY-----DVEAIMKSS------------L---
--------------PI--------------------GGAA------KRLK------------------------------
--------------ISLESEQKQS--------------------------------------------------------
-------------------------------------------------LNDNY-----------QQTLHNGV-------
-----------------------------------NNSSSNNSINF----------GAISPVSAI---------------
------------------------------------------------------------------PCG-----------
---LPFDANQP----------------------------------------------------YYHHSFFPHL-------
-------------------------------------QYSS---------------------------------------
-----------------NDGGASDHTS----------TMPL---------------------------------------
--------------------------------------------------------------------------LPPPA-
----------------------------------EIF------------------IWPHQSY------------------
--------------
>Solyc11g010710.1_Sly
-----------------MAPDNNN--------------------W-LSFSLS---------------------------S
MEMLNSTSSH----------------------------HHQ---------------------------------------
------------NNSNNNNSSLLHFDLASSSADSHQYYFADNF-----FPHGWSN-------------------------
-----PQVMYSEAEKEVIGLNI--------------------NTDSSIFQNFVEN-APPK---LEDFFGGDSSSLT----
------QDSSSL----THIYENPNGS---AVYD-----------------------------NNNYNEHQ----------
--------------------------------------------------------------------------------
-------------------------------------------------------------DFKNITGF-----------
--------------------------------------------------------------------------------
----------QAFSTNSGSEV-DNSV--GTEFGTNESCNE----------------YSQCVAAAVAAAAPPLLP---GGG
G--------ALSLAVNAAAATTTN---------------ENEKAMVAVADSQ----------------------------
---SCKKISD----------------TFGQR--TSIYRGVT--------RHRWTGRYEAHLWDNSCRREGQA-RKGRQVY
LGGYDKEDKAARAYDLAALKYWGPTATTNFPVTNYTKELEEMKHMTKQEFIASLRRKSSGFSRGASIYRGVT-RHHQQGR
WQARIGRVAGNKDLYLGTFATEEEAAEAYDIAAIKFRGVNAVTNFEMNRY-----DVEAIMKSS------------L---
--------------PV--------------------GGTA------KRLK------------------------------
--------------LSLESEQKSSSSNNNN--------------------------------------------------
-----------------------------------------------------------------QQQQMTQC-------
--------------------------------------NSSNNINF----------GAMPPVSAI---------------
------------------------------------------------------------------PCG-----------
---VPFDNTAPA---------------------------------------------------FYHHNFFQYL-------
-------------------------------------PGNA--------------SVPD---------------------
-----------------SNATTTMAA-----------AMPL---------------------------------------
--------------------------------------------------------------------------LPSAA-
----------------------------------DLF------------------IWPHQSY------------------
--------------
>Sobic.001G485200_Sbi
-----------------MDMNNG---------------------W-LGFSLS-PS-----------------AGR---GG
YGDGGASASGDGGDGSCSS----------------------------AAAASPVPLVA----------------------
-------------MPLQPDGSL---HYTSA--------------------PDWR--------------------------
---------HGAAEAN-----------------------------------------GPK---LEDFMSVTCSSNNKRFY
DRCSHAEQANKY--------------------D----------------LQ-------C-----GSYYHGSSGG---GGN
GINMNAPPCSGGGFPDHHH-----------------------------------------------HHQF----------
-------------------------VSSHHGQYF------LGAPLNASPPGAV-------MYSAGGGGVGG-------MS
ISGIK--SWLREAYV------PPERPV-----------------------------------------------------
-------AAAAALSLAVTD---------DVG-AEPPQ-------------------------------------------
--------------------------------------------------------------------------LLPAAP
MPPVHRKPAQ----------------TFGQR--TSQFRGVT--------RHRWTGRYEAHLWDNTCRKEGQT-RKGRQVY
LGGYDREEKAARAYDLAALKYWGPSTHINFPLSHYEKELEEMKHMSRQEFIAHLRRNSSGFSRGASMYRGVT-RHHQHGR
WQARIGRVAGNKDLYLGTFSTQEEAAEAYDIAAIKFRGLNAVTNFDISKY-----DVKRICASTHLIG------------
------------------------------------GGDA-----CRRSP------------------------------
--------------------------------------------------------------------------------
--------------------------------------------------------------------------------
--------------------------------------------------------TQPPDAPAL---------------
--------------------------------------------------------------------------------
---IDAAGADRSSDAP----------------------------------------------------------------
-------------------------------------GGGD----------QAVSDNSD---------------------
-----------------SAGHRGAHL-LHGLQY----GHPMKLEAG----------------------------------
----------------------------EGSSWMAAATAAAA--------------------------------RPVAG-
------------------------------VHQLPVFA-----------------LWNDC--------------------
--------------
>LOC_Os03g07940_Osa
-----------------MRHRQAAQASCRTT------------------TIS--------------------------SC
LPMASTSWAH----------------------------------------------------------------------
-------------------------------------------------RTQWRRRR-----------------------
--------------------------------------------------------TTPA--------------------
--------------------------------------------------------------------------------
--------------------------------------------------------------------------------
--------------------------------------------------------------------------------
--------------------------------------------------------------------------------
--------------------------------------------------------------------------------
---------------AAAAASSTD-----------------------------------------------------PCR
SPASSRGSGR------------QCTCRNGQRRRRSPCRPLPRARRCR--RCRWSGRHSSGLEDTGTTLAGRKARPGKEGF
-GGYDKEEKAARAYDLAALKYWGPTTHINFPLSTYEKELEEMKHMTRQEFIAHLRRNSSGFSRGASMYRGVT-RHHQHGR
WQARIGRVAGNKDLYLGTFSTQEEAAEAYDIAAIKFRGLNAVTNFDISKY-----DVKRICSSTHLIG------------
------------------------------------GDLA-----CRRSPTRMLPPDAPAGAAGV---------------
---------------DVVVAPGDHQQISAGGGGA----------------------------------------------
--------------------------------------------------------------------------------
---------------------------------------------------------SDNSDTAS---------------
-----------------------------DGHRGAHLLHGLQYAHAMKFE------------------------------
--------------------------------------------------------------------------------
-------------------------------------AGES---------------------------------------
-----------------SGGGGGDG-------------------------------------------------------
----------------------------ATTNWMAAAAAAARPVAG----------------------------IPTTV-
------------------------------HHQLPVFA-----------------LWND---------------------
--------------
>Azfi_s0033.g025087_Afi
MFN------------SDAASVGNNQNKNEHE---------------LSATINNPH-------------------------
-----------------------------------------------SAATSSNPQ------------------------
------------GLPKEADATL----------------------------------------------------------
--------------------------------------------------------PDPA---LRELLSPESDVIN--AT
TDAHAGFNIKSM---------------LTYAND-------------------------------LDTSHMANPPWIN---
----------------------------------------------------------------AEHCAS----------
--------------------------------------RVINDRNDAEVVKLE-------PRGDIHVGLGA----ANYAS
ASSLTSMAMINST--------PANHAPNS-----------------------RG--------------------------
----------SGLTLSMNP---NHNNNYASEDASSYANQGYGYRD------ASEEAGRYLLNQGVNYAAQAVM----GGG
NYSEGANVRSGIMNYVEETEAAAE-----DE--------DLRKKMSITTDKGNN-------------ENSDG-----SAG
VDSTTRKSID----------------TFGQR--TSVYRGVT--------KHRWTGRFEAHLWDNSCRREGQT-RKGRQ--
-GGYDKEEKAARAYDLAALKYWGPTTTINFPLANYEKELEEMKMMTKQEFVASLRRRSSGFSRGASMYRGVT-RHHQHGR
WQARIGRVAGNKDLYLGTFSTQEEAAEAYDIAAIKFRGANAVTNFDMNRY-----DIQKICSSSTA--------------
--------------TTTT-PNHNNLNPLMIRPPSNASSAA------SKPLVNHKNSKLDYYT------------NYHLSV
QSPVP----------NSSNSNSNSNSNSSN----------------------NATTTANAMDIRPFLHTTPSPLMIM---
NDH----------------HHHHRH----------------------------------------MHNPNESNLN-LNA-
------LTSHMSYPKEDHHMN------------------SASTHL-------------DNPSMALVSL------------
--------------------------HSNVHHHNNGLMNPLYNHHHA--------------------------------H
INQMNSGNNNSTTSTRG--------HDSSS----SSSS---------------------------SSSSMHQWQLQ----
-----LMGQYMPHHEINSSSN---HPPNIMSHHDHN-HNNT----------LSTYDHHEQLQQQYNHQYTMWSKMDQGLF
CKPNNNSNNSASHNNP-NRGDNNNNNNNKSSNYMNM-MHHHPYL-------------SYGRA-------------SSACA
TPTSTSSSTPI---QAQN---LIIDLERAAGGGTT-TTTTTSLVKSNCRMSSNKNRRLNYNHHHPH--HNNSNDMPPPAD
DHHHNT-------------PH-VDREEEDRHLLDPLVS-----------------SWSTDHQHQHHHH--HH--------
-------HDADETS
>s0055.g014417_Scu
-----------------M--------------------------------------------------------------
--------------------------------------------------------------------------------
--------------------------------------------------------------------------------
--------------------------------------------------------------------------------
--------------------------------------------------------------------------------
--------------------------------------------------------------------------------
--------------------------------------------------------------------------------
--------------------------------------------------------------------------------
--------------------------------------------------------------------------------
--------------------------------------------------------------------------------
--------------------------------------------------------------------------------
LGGYDKEEKAARAYDLAALKYWGPTTTINFQLENYEKELEEMKTMTRQEFVASLRRKSSGFSRGASIYRGVT-RHHQHGR
WQARIGRVAGNKDLYLGTFGTQEEAAEAYDIAAIKFRGVNAVTNFDMSRY-----DVPKICNTHTLLP--------I---
------KDHKFYHSPNHPTHNQPDYI------------------------------------------------------
------------HNPTINHPSPPSNHTLNHHDTL-------------------------------SSNKDHWRLL-----
------------------------------------LGFSNSIGS-LSLIKNQLP-----SGCTTEHLKNKQI-------
--------------GD-----L-------------------------------HLLHNSNSGSGVVEQLLL-N--PNP--
--NPTPN-----------------PNPNSQTVTDHGTMSTLL--------------F-----------------------
---IDGTLHNNKSD------------------------------------------------------------------
-------------------------------------GKYSMLQ---------------E--------------------
-----------------HQGMMGDHK-----------------------------------------------GLHDNEN
GRNSLNRDV-------------------GLTLVRSNYSSTSSLSTTS-----------------------YNHHHPHHLH
LHDATSLLGLK--------------ANSLAICPTPMFA-----------------SWNEA--------------------
--------------
>Azfi_s0619.g079558_Afi
-----------------AAAAPQ--------------------------AAS----------------------------
---VKSSSSD----------------------------------------------------------------------
--------DDEEEIKIKGHGFM----------------------------------------------------------
----------------------------------------------------------PK---LEDFLGPQASYHTMNAP
ASSHSCKESPSF----NTMLFSTAIK--------------------PAHI------------SLQHHHHHPDDDDDDAQD
AINTNTNNNTGADTLSTRSNTESPLKQSEITEPRPNALALATCQSDHLAHDHQYNDHALTASNAASHHHGHGDLLLMNQS
LIYTSEDHDQIMLA----NHHNH-HHDNSYGNNM---LELMNNQGSGSMDPSTHHHHQDH-NHNNLVGL-----------
-SFMK--PWFGMQ-------RSGTQSSI-------------IDQTTTVTT---GNNNSSIVM----------AGIHDDNN
NI----NNGNQSLSLSITPSNTNNNNNNRTN-TNSVHADNQYN-------------YISPTSPNISTNTSIIHPHNH---
---HNHNIVAYPRSLNDPTSTTTTTVTLHDHTHVGEIANNDSKPARTITTTSSLNDPDPNLIAHHSHFPASPSVSTPSAN
ISSTPRKSVD----------------TFGQR--TSIYRGVT--------KHRWTGRYEAHLWDNSCRREGQT-RKGRQ--
-GGYDKEDKAARSYDLAALKYWGPTTTINFPLSNYEKELEEMKNMTRQEFIAYLRRNSSGFSRGASKYRGVT-RHHQHGR
WQARIGRVAGNKDLYLGTFSTQEEAAEAYDIAAIKFRGVNAVTNFDMSRY-----DIAKICSSNNEQL------------
--------------PI--------------------NALA------KRIKDESTAET-----------------------
--------------LNVLQAGKDSFRLETELASLYGSSAGP---------QEWQLLGYTQQVPLPSAAYNYQQ-------
QQQLA--------------YQQQRLSWP---------DDPNH--------PKSTD----LL-FKARDHQVSSLMSSPF--
------------------------------------MHPSSTNYTRF---QTHAAVPSLSSISGLSNTTGH---------
----------------------GGGG-ALMGGAQLNLMHNYFQDEPALGGSQECT----------TPTTTTTTIDINGMQ
LAIMDSGNSLPPSNIL--------SMSSNNMYCSLSEGSDVVDINEGCPRRGPIPTNLSIMKAVAAASNISSLDRGGGVP
------SGVQQVNNHNNNHNN----------------NNSS----------SGSSGSNNDMMARNNHVL--YNYMGQ-HM
IQPTNPSTTNHTRDDD-PHHHAGSTL----VSYSNSFMKPN--------------LLYGQSSETYLHT-------TQNNN
TNTNTNNSG--TA-----------NNIHSAGNWMV---------------------------------------LPQQSS
AYNHP-------------------------TTKPNMFA----------------PAWNHHNLHD----------------
--------------
>MA_20162g0010_Pab
-----------------MNSSLKTKKRTAG-------------------SLSSPDL------------------------
--------------------------------------------------------------------------------
--------------------------------------------------------------------------------
----------------------------------------------------------PE--------------------
--------------------------------------------------------------------------------
--------------------------------------------------------------------------------
--------------------------------------------------------------------------------
--------------------------------------------------------------------------------
----------ENLSDSQHQ-L-------KST-------------------------------------------------
-------------------------L-------------KNKKRTAG------------------------------SLS
SPDLAQKNLS----------TSPHLPQKNQRQKKSTYRGIS--------TKSSTGNYDAVIWDSTYKREGGV-RNGKQ--
-GRYDSEEKGARAYDIAALKFWGPTAQTNFLRTDYEKEIQEMEGKTKAEVVGMLRRTSTSFSKGTSKYRGVTR-----GK
WQAQIGK--YNKDIYLGKYSSEEEAARAFDIGNIKYRGRDVVTNFDINIY-----DIDKILSAECLSIGKHQ--------
DFLKQRETSIVLYNPQCDS---------------------------RRIS------------------------------
-------------DTIIASAVSGQQEIASV--------------------------------------------------
---------------------------------------------------------------VPDQQE-----------
---------------------I-------------------------------------ETSIVLYNPQLH---------
-----------------------------------STISNMFA-------------------------------------
--------------------------------------------------------------------------------
-------------------------------------SGVT---------------------------------------
-----------------DQQEIRKLK------------------------------------------------------
--------------------------------------------------------------------------------
-------------------------------------------------------LEDNNI-------------------
--------------
>scaffold00024.229_Atr
-----------------M-------------------------------DLSRTH-------------------------
--------------------------------------------------------------------------------
------------QAPGLQSSRL---ISTSEFTNNNVER------------------------------------------
--------------------------------------------------------ENPK---LEDFLGATAHPPPF---
----------------DPVYYQRGHHALDFDRD-----------------------------------HPSTAG------
--NVNIPSFLQSSTSSRERESEEAQA----------------------LTSSLIRRFDQPETFIPSHLQN----------
------PHLYNMA---------------------------LEN-----------------GSMSHAIGSG--------PG
ISGLK--SWLRQN-------APSDKRLVH-------------------------------------------DGSEKAGQ
IV--ASNGDFQALSLSMSS---------GSQ-STSVS---------------------LPQSAAIVCVPSD---------
---------------------------------------NARKRGHGKA----------------------------LTK
EP-VPRKSIE----------------TFGQR--TSQYRGVT--------RHRWTGRYEAHLWDNSCRKEGQT-RKGRQVY
LGGYDKEEKAAKAYDLAALKYWGPSTHINFPLSTYEKELEEMKNMTRQEFVANLRRKSSGFSRGASVYRGVT-RHHQHGR
WQARIGRVAGNKDLYLGTFNPGQPSI-----------STNADANKESAIF------------------------------
--------------PQV-------------------EEAA------RLLT-DLSG-------------------------
--------------------------------------------------------------------------------
--------------------------------------------------------------------------------
-----------------------------------------------------------NTNNSL---------------
--------------------------------------------------------------------------------
VSSLSNPSSNPES-----------------------------------P-------------------------------
-------------------------------------NHSS----------THCENDPNKMTI-----------------
------YNGVRQVQDG-GGGDYSQALF----------LSPE----------------FGGKY------------------
--AKYEGSNIS-------------NNVGGNIGWMG-------------------------------------SNRPSFP-
-------------------VF--------HQHQLPMFA-----------------LWND---------------------
--------------
>IXLH_scaffold_2015896_Phe
-----------------MSAENHGSFTSQMLVEALNSSTSTPSDW-PHFSMQ-PQYLLNTDLAMYA------------AG
HGEVGSNIAH--------------------------HHHHDR---------HQIPRV-----------------------
------------EAAGNQDEKM-----MQSFGQAVRVKTE----------------------------------------
--------------------------------------------------------ESPK---LEDFLGAAGPQYNHA--
----------------ENMYF-----------------------------------------------HHPHRSQAMAGI
NITVPFPYPSLSSPSCKQ------------------------------GMPSPSTTHAYPGADTVAHAQAASGLDYL---
-----DVQSNKSLQI----HDHHL----------NFQAALLQD-SMMVGDNVLKHAAASHGSGSGHIGHGTS----QHGT
AAGLN-MTWSCPNVVT----VPLESVCMQ----------------------ANG--------------------------
----AALRDMHALSLSMCP-------AIGSGHSDQMV-------------------------------------------
---------APSTAVVAHPNQGSNSIV------------ESKKRGCNSK---------------------------PGGN
KPHGPRKSID----------------TFGQR--TSQYRGVT--------RHRWTGRYEAHLWDNSCRKEGQT-RKGRQVY
LGGYDKEEKAARSYDLAALKYWGSSTHTNFPLSTYEDELAVMKSMTRQEYVASLRRKSSGFSRGASVYRGVT-RHHQQGR
WQARIGRVAGNKDLYLGTFSTQEEAAEAYDIAAIKFRGIHAVTNFDMSRY-----DVERICASSSLLA------ADL---
----AKR-------PNS-------------------SSIK---LELQKASPELQPNPEDALS------------------
-------------LHNSESSNINKHDSYEGACNDGVRAL-------------------------------EWPNMPE---
QEDN---------------EGETQKQWL--------EEHDQD--------HKQCK-PT-------QVQPKQSCLGDDV--
---------------------------------------------------------NSKSNRNL---------------
----------------------------DAAPDVGHALNDVLSRHSSPN-------------------------------
---VSTGAHHQPSGPV---------SNSCKVPHNRFSFSPEF-----------------APNVQMNASSSSSSLVA----
-------------------------------------LQSS--------TRNDLAESPD---------------------
----------NSMSEI-DNGSPKGVS-----------SQLE--------------IVLPGELAKELDLVTTC---SHHHV
PAAAFRSNS--PA---------------LVAPWMI-NGAVNMQNPGG---------------------------RP----
------------------------------MGHLPMFA-----------------VWNDT--------------------
--------------
>s0039.g012165_Scu
-----------------MEHDSS-------------------------FTIA----------------------------
--------------------------------------------------------------------------------
------------------------------------------------AASYWNNHGAACG-------------------
--------------------------------------------------------LRPSAYGYADFTTGKKPV----FY
NVCDSDRQTSSL-------------------NE-----------------------------------HSCNNGVSD---
-------------------------------------------------------------KYNAEHYGY----------
-------------------------------------------------------------RGTNTQGTPS------TAN
YADIK--RWMAHI-------------------------------------------------------------------
-----HVQKGPAVDQSTSPDMKSNWV--GSYGHSSDPYITSSADMIIKSNMDL-------QTLTIHPAVQD---------
------------QCPQNINVASHQ--NL------G----FSRSHHTNKGPNSFS--------------------------
---NQQQSLI-----------AHKCSTFGKR--TSQYRGVT--------RHRWTGRFEAHLWDNSCKKEGQI-RKGRQ--
-GGYDEEDKAARAYDLAALKYWGPSTQTNFPLSMYEKELTEMKKMTRQEYVASLRRRSSGFSRGASKYHGVT-RHHQQGR
WQARIGRVAGNKDLYLGTFS-KHSM-------------------------------------------------------
--------------------------------------------------------------------------------
--------------------------------------------------------------------------------
--------------------------------------------------------------------------------
--------------------------------------------------------------------------------
--------------------------------------------------------------------------------
--------------------------------------------------------------------------------
--------------------------------------------------------------------------------
--------------------------------------------------------------------------------
--------------------------------------------------------------------------------
--------------------------------------------------------------------------------
--------------
>s0020.g008088_Scu
-----------------MRSMNTTT------------------AA-AAAAAA-DH-------------------------
-------------AGSFTSQM------------------------------LEIASLKPTSH------------------
----------------GGHGSL---VMMEAL--------------------------------------------NPSHV
Q---------AAEASGGG---------------------------------------KPK---LEDFLGSSAAP-T--PY
TA----TNTTTSS----SMFYNQH--HHHHHHLDSGININTMPFSAPAPL--R---------NPKPEHHH----------
-----ILPPTSLHSYSSNSA---PSIDPNAML----PFHAHDAFH---ASTSAAMLRMHEQSEQQRHQQL----------
-----YHHVHM--------HEPHHISDGDGVNNQ------QQH-QDHHLNNQRSGVA-----PLQEQGM-----------
-LALK--AWLGQQ--------GGG-----------CGQMEQKASEQQQ--------------------------------
----------QCLSLSMQN---------SAM-MMGGM----------------ILG--TG--EALAAEHHHHN-HHHQGM
AAAQGGVVVMGMEVVASQPATGKK---------------GSRGGA---GGK---------------------A----VGK
AH-APRKSLD----------------TFGQR--TSQYRGVT--------RHRWTGRYEAHLWDNSCRKEGQT-RKGRQ--
-GGYDKEEKAARAYDLAALKYWGPTTHTNFPISTYKEELEEMKNMTRQEYVASLRRKSSGFSRGASVYRGVT-RHHQQGR
WQARIGRVAGNKDLYLGTFSTQEEAAEAYDIAAIKFRGIHAVTNFDTSRY-----DIQKICSSSTL--------------
--------------LI--------------------GELA------RRKP-ETKPSANAE---------------D---Q
QPKDG----------MLSLPAKEESSNIGI--------------------------DAKKQKQLEWKSGTELVIK-----
---------------------EEKKGHMEGDR----LDAENKLIA---MAEEMH----------GEEEEED---------
-------ALVHQLD--EH---------------------GAEGIA--------------HNHP-----------------
-------------------------------GEILAIPSGLLH-------------------------------------
---TTARFPNE-SSQS--------------------------------------------------MNGLQLKQ------
-------------DVLQSAAG---SPSSFISN-----AGNN----------NRGIGSPEN--------------------
-----------SMSEV-DDGSPKQL------LM-------------------------PGEYSKALDMAANEHH--HQHH
HQHAAAYGV--------------------TGAVVA--PWMLNSSSIQ------------HHHHH------HHG---GVR-
GGHL------------------------------PMFA-----------------VWNDT--------------------
--------------
>Azfi_s0006.g010452_Afi
-----------------MDHITNNNNNNN--------------SW-LSFSLS-PYLAMEQDQHNMTPHHHHQITSTAAAT
TSIANTNTSHLNQVYNSASRGDH-------------HHHHH------HQQILSPPPHTPSSSDHI---------------
---SGYH-PHPSTSQMLEIASL--PSLSNSRSNSGHQNP----------TSNLAMMGAALTNP-----------------
---------AGASVASLMGFVFYGS---------------DDHVGITSNNTIAHSSRPPK---IENHNHNNSFNAL----
-------------------------------LD------------PPPHLH--------HLNHTQNHQHNGHGNY-----
--LLNDPL--------KDHNSQHYKFYP--------------------PSTQNKSLTLLQMQEEAHHNHH----------
--------------------------------------VMLDN-----------------DHDDTIVGF-----------
-SALK--TWLGHS---------------------------GGEKLDEFS---KGVMKES-----------------SGVN
LQ--------QSLSLSMNP-------GVNTN-ASGIIATNPSGIM------GTNPG---HTNPGIVSATSP---------
---------TEGANMVEHHVMASD----------GTVQ-DSRKRGSSNKA---------------------------AVS
KAHAPRKSLD----------------TFGQR--TSQYRGVT--------RHRWTGRYEAHLWDNSCRKEGQT-RKGRQ--
-GGYDKEEKAARAYDLAALKYWGPTTHTNFPTSTYKDELEEMKNMTRQEYVASLRR------------------HHQQGR
WQARIGRVAGNKDLYLGTFSTQEEAAEAYDIAAIKFRGIHAVTNFETTRY-----DVPKICSSNTLLV------------
------------------------------------GEEAR-----RKVE------------------------------
------TKHNDIFQEGIEEQNVGEGEEENSTKEGSRRKTKG---------------------------------------
------------------------------------------------------------------KKESQQLMMKEDE-
--------------------------------------------------------EGERNQMKLISLAAN---------
--------------------------DDDPLIDDDNAAQGLANSPGEILA-----------------------------S
VPSLSTGSSSSG------------------------------------P----------PPQLCPNVNGLLLLHENA---
-------------------------------------ESNN-----HPMMMMMMMGSPE---------------------
----------NSMSEV-DDGSPKEML-----------TIPGDYTKALELADN--------------------EHHHEEEE
ADNEYHHRG-------------------VAVPWMLNDSNLQQPQQQQ---------------QQ------QQPQQPQPQP
QQQSVA-------C--------VRGGGGGHHLLQPMFA-----------------AWNDA--------------------
--------------
>Solyc03g123430.2_Sly
-----------------MSN------------------------W-LGFSLT-PDFRIDDD-----------------DE
EEVKNYERRNEAAENTPVS-------------------------------------------------------------
------------VMPLSTNRSL---CMMDPFPRCEPTEDC------------WRYENHEMS-------------------
--------TANNPEEE----------------------------------------EGPK---LEDFLGCCYSNSPS---
---NEEQQISEIN--------------SINQSD-----------------------------------HEQHQLEIG---
--LIQSPQ-----------------------------------------------MMIQNSQLQSSHHEFA---------
-------HSTSSVY--------HL------------------------------------DGATSVSGF-----------
------KSWLRQA-------APLMSSAE----------------------------------------------------
--EIVNPSNCQALSLAAAP-------------------------------------------------------------
-----------------------------------------KKRPVAVKNG--------------------------GGS
KESVPRKSID----------------TFGQR--TSQYRGVT--------RHRWTGRYEAHLWDNSCRKEGQT-RKGRQ--
-GGYDTEEKAARAYDLAALKYWGPNTHINSP------------------------------------------KHHQHGR
WQARIGRVAGNKDLYLGTFSTQEEAAEAYDIAAIKFRGTSAVTNFDISKY-----DVKRICSSSTLIT------------
------------------------------------GDLA------KRSP------------------------------
--------------------------------------------------------------------------------
--------------------------------------------------SKD---------------------------
-----------------------S----------VVCPSSYEDYS-----------SCTTSPQPI---------------
-------------------------TNGEQLQQPIDSFMNMVPLMGA---------------------------------
--------------------------------------------------------------------------------
-------------------------------------AGSS---------SRSSSNAPSK--------------------
-----------------CSGSGEMSC-----DFGVGLEYPQAY-------------------------------YSPVQV
QDHKFEDGS------KEND-----------------DNSSSSGQIGN-----------------------MDLVHP----
---------------------------------VPMFA-----------------LWNQ---------------------
--------------
>s0004.g002296_Scu
MDSR-----------MAMDAMNN---------------------W-LGFSLS------------------------QRQG
GGSVESSLSSAGMKRNDGGDEGDTS------IDT--HHHHED------------------------GVA-----------
------------EAAAAQQGSF--AQMLEIATMSPHDQDGEGKEDHVTGSKDWHSDR--------GAKQEYEGYD-----
-----DYCADGVEMDTKMRTQKLS--------------------------------HGPV---LEDFLGISSSYGGDDSF
EQANAFLSSASV-SSVSPLSYHHGLA-FSIPSD-----------------------------QFQESIHEQEKQKAF---
--AVKFPL---------------------------------------------------EDNSYAFHDGLFAAADYP---
-----------------LNLQRHAAGTAFSGNDERARVAGYKDSSQSFCPSEVVMAPDDGMAQSNSRGA----DRMVSTR
NCSFA-SPWMDSLVASDMRNLPRATHNSM-MMMMLVT--DCNSSHEDVAVECDGMESSDNATTWDGHKVEKMPSSANGST
MNDMAVPVSERSLSVPQAGETRDNVMLIESSSASPPSQEVGEFA---------------RMKSAVSSHAQA---------
-------IGAFDQGMASADASAVA-----DHSHMGGIG-NSKKRA--------------------------------STK
SPSTERQAASG---------HGKGNDTFGQR--TSQYRGVT--------RHRWTGRYEAHLWDNSCRIEGQT-RKGRQ--
-GGYDREDKAARAYDLAALKFWGPSSHINFPLSTYEQELEDMKNMTRQEFVASLRRKSTGFSRGASVYRGVT-RHHQQGR
WQARIGRVAGSKDLYLGTYSTQEEAAEAYDIAAIKFRGPNAVTNFDISRY-----DVQMICSSSGFLP------REL---
----SGRKKSCNNPPTLV------------------EEEA-G----RRSH-KMEDETVEATPEAD-------GRQHYVKR
MAMDGS-KIGFSRVMDMASTDLIASAFSSPRETCDLQHRSPDSCNENSGHISSTLQSPATREGLPHILDDHHPSKKTRSL
QNACL--------------------------------SENNS--------EEE-----------GEQSNDTNDFSEEG--
---------------------LSR----------ITGEAMAHDVNHV---QTHAWNGTSYNASML-----------QP--
---PLP--------------------PAHGRNDHTPVMRREEQPRYADCSNRSDK--ID--------------------A
GSQVDRASPEEEAAAED------EAQKTARENQGPSHLNNSIDRPS-------------------RNEAFPDE-------
-------------------------------------TGSS------Q---LATAADYK---------------------
---------LVSTDGS-LHGEEDDT------------VTTDPGSPHLE-------VVLEGEFSEVGMDTEE----KSNSA
DSEGEDTSS--KK---------------KSYEWWAFAATVGSVQ------------------------------------
--------------------------------------------------------------------------------
--------------
>MA_196219g0010_Pab
--------------------------------------------------------------------------------
--------------------------------------------------------------------------------
--------------------------------------------------------------------------------
--------------------------------------------------------------------------------
--------------------------------------------------------------------------------
--------------------------------------------------------------------------------
--------------------------------------------------------------------------------
--------------------------------------------------------------------------------
--------------MAVTS-------------------------------------------------------------
--------------------------------------------------------------------------------
--------------------------SFAQQ--SVGYNNTD--------AHR-------ELPSNTLERSDISHNAGPLSF
LGGYDQEEKAARAYDMAALKYWGPKTTTNFPISQYRDALNEMQHLTRQAYVASIRR------------------HHQHGR
WQARIGRVAGNKDLYLGTFSSEKEAAEAYDVAAIKFRGPNAVTNFEMSKY-----DLKTIENC------------IL---
--------------PIGAA---------------------------KRLKAKAESAVEGSVNNGRSTDE-----------
-------------ECTLSSQTDSTSYIGNAARTE-----------------------SLQQQSHPMQAAYELQKVQL---
-------------------------------------------------YNQDLHMQL----HNVNQQK-----------
------------------------------------------------------YIQASGSTHEL---------------
--------------------------------------HNLISLESA---------------------------------
---VNNNNNNNN-----------------------------------------------------ASNSTPGIYTN----
----------------------IS-------------NGLAI---------NGLLANPSE--------------------
-----N-----------SEGYAAAKS----LTFGNMLMPPQHFAMNNL---------------YYLPQQKQHPGLAKDTS
DNLEYNNGM--ET-------------------------------------------------------------RPNLK-
------------------------------AGHAPIF-------------------------------------------
--------------
>Mapoly0009s0013.1_Mpo
-----------------M-------------------------------RLA----------------------------
--------------------------------------------------------------------------------
--------------------------------------------------------------------------------
--------------------------------------------------------SSPL--------------------
--------------------------------------------------------------------------------
--------------------------------------------------------------------------------
--------------------------------------------------------------------------------
--------------------------------------------------------------------------------
--------------------------------------------------------------------------------
--------------------------------------------------------------------------------
-----------------------------------------------------------H-------------RPVRPVY
LGAYDEEEAAARAYDLAALKYWGPGTLINFPVSDYARDIEEMQNVTREEYLASLRRKSSGFSRGVSKYRGVA-RHHHNGR
WEARIGRVFGNKYLYLGTYSTQEEAAAAYDMAAIEYRGLNAVTNFDLSRY------IRWLRPGQGNSA--------L---
------------QEPESNLSPVP-------------GDESQ--LVDEQCQAAAAA-------------------------
------------AAAAAAAGVGEEPH----------------------------------PPVWPAQSTEPYQLPAL---
-------------------------------------GLASNG-------SQQ------------QQQQQ----------
--------------------------------------------------------RSSSSPTAL---------------
-----------------------------SLLLQSSMFKQMLERASS--------------------------------A
SGPTDCDSTTPSSD------------------------------------------------------------------
-------------------------------------LGMD---------------------------------------
-----------------PSGAPQQLQ--------------------------------------------------QQHP
SSHFFSTHQAPPLVEDDSSEH-------DVSSYLFSNPTSSSNHHHHHHHLSM------YG-----DLTPQDHLSPYSS-
-------------------------FPPGVSSSLPTDSEGVAASLDD----G--AYWS-------------------FGG
ALPLNPI---TSC-
>Pp3c6_21840V3.1_Ppa
-----------------MEPT----------------------------ELK-PN-------------------------
---QPSETGN----------------------------------------------------------------------
------------EEAVPQRSGMV---------------------------------------------------------
--------------------------------------------------------ESPK--------------------
--------------------------------------------------------------------------------
--------------------------------------------------------------------------------
--------------------------------------------------------------------------------
--------------------------------------------------------------------------------
----------------------------GSP-------------------------------------------------
---------------------------------------RGIKRY--------------------------------RRD
RGSSAKERISKMPAC-----------VPGKR--SSIYRGVT--------RHRWTGRYEAHLWDKSTWNEAQN-KKGKQVY
LGAYDDEEAAARAYDLAALKYWGPGTLINFPVTDYARDVEEMQSVSREEYLASLRRKGSGFSRGSSKFKGVT-RHPSMGR
WEARLGQVLGNKYLHWGNPGSSQEEAAAYDFQALEYRSLNSGSNLDLSRY------ITWLRPERAQTAT-----------
----------TSYQPGADTTV---------------SADTL-----SRMKEEEEGGASPTS-------------------
------------DDGPSQRDEGSQPEEQQR------------------------------HQAWPGQLSEPYQLPSL---
-------------------------------------GVLHS--------NSH---------------------------
--------------------------------------------------------KKVTTPSAL---------------
-----------------------------SLLLSSSIFKSMRERSSSLAVAAETD--------KYEPGLE---------Q
GLHMNRSLHDETTSDIFS------------------------------PR------------LHYEMSNFPPS-------
-------------------------------------YGSS------------------QL-------------------
-----------------DEGVVMSGA------------------------------------------------------
--------------------------------------------------------------------------------
------------------------------DSQGPSFSDS--------------AYWDPFVQPLTS--------------
-------QQLTSC-
>PITA_000064815_Pta
-----------------MEAA----------------------------ALL----------------------------
--------------------------------------------------------------------------------
--------------------------------------------------------------------------------
-------------------------------------------------------AMAPE--------------------
--------------------------------------------------------------------------------
--------------------------------------------------------------------------------
--------------------------------------------------------------------------------
--------------------------------------------------------------------------------
-------ANESSLSKRVG--------------------------------------------------------------
----------------------------------------GLKRI---------------------------------SR
G-STAKERISKMPPC-----------AAGKR--SSIYRGVT--------RHRWTGRYEAHLWDKSTWNQNQN-KKGKQ--
-GAYDEEEAAARAYDLAALKYWGPGTLINFPVSDYARDIDEMQSVSREDYLATLRRKSSGFSRGMSKYCRMA-RSSQNGR
WEPRFSRTADNRYFNMANYCEDVQQVTAYPMSLGDQRSFSAAKSIDLSAY------IRWWKPKKMHDH--------V---
--------------------------------------------------------------------------------
------------QVVVTESVNVEEPEMLE----------------------------------WQGKPCEPYQLPSL---
-------------------------------------GVSHS--------RQQ---------------------------
---------------------------------------------------------KPSSTSAL---------------
-----------------------------SILFKSPLFNQMFERASS---------------------------------
--------ANNQDNIVK---------------------------------------------------------------
-------------------------------------VGLK---------------------------------------
---------KEQMNSI-SQGKDRIGY-------------------------------------------------NESGH
GLGSFQLSV--QI---------------------------------------------------------GTTKVPSLS-
-------------------------------------------------------ALSNARPCSK-------------SH
IHTMERT-------
>MA_67041g0010_Pab
-----------------MSNVSSGH-------------------------------------------------------
--------------------------------------------------------------------------------
--------------------------------------------------------------------------------
--------------------------------------------------------------------------------
--------------------------------------------------------------------------------
--------------------------------------------------------------------------------
--------------------------------------------------------------------------------
--------------------------------------------------------------------------------
--------------------------------------------------------------------------------
--------------------------------------------------------------------------------
---------------------------------STHHQGHKKLIGCK--VLRWTGRYEAHLWDKSTWNQNQN-KKGKQVY
LGAYDEEEAAARAYDLAALKYWGPGTLINFPVSDYARDIEEMQSISREDFLASLRRKSSGFSRGMSKYRGLA-KQSQTGK
WEASFGRVLGNRYFSLGSCSTSEEAAAAYEMSQGEYRGFGMVRNIDLSSY------IRWWQPNKSLEV------------
-------------EPSAPRH----------------MDEAH---------------------------------------
------------SMSEERHTQGDEPETPQ----------------------------------WPGQACEPYQLPSL---
-------------------------------------GVPNN--------GKH---------------------------
---------------------------------------------------------NPSPVTAL---------------
-----------------------------SILHQSSSFKQMLEKASA---------------------------------
--------------------------------------------------------------------------------
-------------------------------------KGKS-------DQDMNAGDNPEQL-------------------
-----------------EKGKGKNCL-------------------------------------------------AEDTN
GSKEFGCHSGA-------------YQPPGQTSTIFPFAQVQS--------------------------------APPIQE
I------------------------FPFAQVQSAPPIQDCNTTAPVSD------SLWTNFVPTT--------------GG
VALANAV---SIC-
>AT2G41710_Ath
-----------------MASVSSSD-------------------------------------------------------
--------------------------------------------------------------------------------
--------------------------------------------------------------------------------
--------------------------------------------------------QGPK--------------------
--------------------------------------------------------------------------------
--------------------------------------------------------------------------------
-------------------------------------------------------------TEAGCSGGG----------
--------------------------------------------------------------------------------
-------GGESSETVAASDQM-----------------------------------------------------------
---------------------------------------RGFKKA--------------------------------KKE
RGCTAKERISKMPPC-----------TAGKR--SSIYRGVTRF-GCELSRHRWTGRYEAHLWDKSTWNQNQN-KKGKQVY
LGAYDDEEAAARAYDLAALKYWGPGTLINFPVTDYTRDLEEMQNLSREEYLASLRRKSSGFSRGIAKYRGL------QSR
WDASASRMPGPEYFSNIHYGAGDDRGTEGDF----LGSFCLERKIDLTGY------IKWWGANKN---------------
------------RQPESSSKA---------------SEDAN--DAGTELKTLEHT-------------------------
-----------------------------------------------------------------SHATEPYKAPNL---
-------------------------------------GVLCG--------TQR------------KEKE-----------
-------------------------------------------------------ISSPSSSSAL---------------
-----------------------------SILSQSPAFKSLEEKVLK---------------------------------
---IQESCNNENDENANRN-II-------------------------------------------NMEKNNGKAIEKPVV
S------------------------------------HGVA---------------------------------------
-----------------LGGAAALSL------------------------------------------------------
----------------------------------------------------------------------QKSMYPLTS-
------------------------------LLTAPLLTNYNTLDPLAD------ILWTPFLPS---------------GS
SLTSEVTKTETSCS
>Azfi_s0207.g057931_Afi
-----------------MNQNQKKKKRSR--------------------TPRDPD-------------------------
--------------------------------------------------------------------------------
--------------------------------------------------------------------------------
--------------------------------------------------------PSPH--------------------
-------------------------------DD-----------------------------------HH----------
--------------------------------------------------------------------------------
--------------------------------------------------------------------------------
--------------------------------------------------------------------------------
-----CMVNANGVSTNHHP-------------------------------------------------------------
--------------------------------------------------------------------------------
--------------------------HHHRR--SSKYRGVT--------RHRWTGRFEAHLWDKNSWNQSQS-KKGRQVY
LGAYDNEDTAARAYDLAALRYWGPETILNSPQGNYEKEMEEMQRYTREEYIAFLRR------------------HHHNGR
WEARIGRVFGNKYLYLGTYSTEEEAAIAYDIAAIEYRGLNAVTNFDMGNY------IRWLKPTTSSSL--------LH--
ESNICSIDNKTHKDPHVINDLANQ-------VLLSVGTNS------TNLEGSIEPQ------------------------
---------------MIETSRYTSHNVLSNIDTL----------------KTPIIHNIVTQKNLREKSRHEYTNN-----
-----------------------------------SSKLNGNTNI---NLNAH----------RTQKSSDSPLFSSSCH-
---ANNSLGFCKSN-NIP---LFN----------MSTPAQTHEDYFCHAGETNSPLHGSSPMSNLEEINMI---------
------------------------GEPTTQLHMNVNTMMRLRETNNIKHD-------------VLAPTN---AILSSS-T
ISPTSSTYNNNSPTSMCT----------------------------------------T------YNSTLDQTHFDHNIV
L------------------------------------HGATV--------------------------------------
-----------------LSGACETTQL----------MNPSCASSSPQIIYNYNPSC---------------PSPSSSSQ
MSYNYNANS---------------------------CPSSSQVSYNS-------------------NLQQSNVMRPKSTS
QRFLTHHDEQSTYIHEYMDP--CNIDMNNNNIMDPIFGEELSSLVSD-------YIINEAEGNVKNTNIIHHNQGYLYGT
SLYMDPVYRMSAIS
>AT4G36920.1_AthAP2
-----------------MWDLN-----------------------------DAPHQTQ----------------------
----REEESEEFCYSS----------------------------------------------------------------
------PSKRVGSFSNSSSSA----VVIED--------------------------------------------------
-----------GSDDD-EL-------------------------------------------------------------
----NRVRPNN-----------------------------------P------------------LVTHQ----------
----FFPEM-----------------------------------------------------------------------
------------------------------------------DSN----------------------GGGV---------
ASGFPRAHWFGV--------------------------------------------------------------------
-------------KFCQSD---------LAT-------------------------------------------------
----------------GSSAGKAT---------------NVAAAV---------------------------------VE
PAQPLKKS------------------RRGPRSRSSQYRGVT--------FYRRTGRWESHIWDC-----------GKQVY
LGGFDTAHAAARAYDRAAIKFRGVEADINFNIDDYDDDLKQMTNLTKEEFVHVLRRQSTGFPRGSSKYRGVT--LHKCGR
WEARMGQFLGKKYVYLGLFDTEVEAARAYDKAAIKCNGKDAVTNFDPSIY-----DEELNAES-----------------
-------------------------------------SGNPTTPQDHNLDLSLGNSANSKHKSQDMRLRMNQ--------
----------------QQQDSLHSNEVLG---------------------------------------------------
--------------------------------------LGQTGML------NHTP------------NSN----------
--------------------------------------------------------------------------------
--------------------------------------H-----------------------------------------
----QFPGSSNIGSGG-------------------------------------------------GFSLFPAAENHR---
--------------------------------------------------------------------------------
-----------------FDGRASTNQ------------------------------------------------VLTNAA
ASSGFSPHH--QIFNSTS--------TPHQ-NWLQT-NGFQ-----------------------------PPLMRPS---
--------------------------------------------------------------------------------
--------------
>Solyc02g064960.2_Sly
-----------------MWNLN-----------------------------NSPDHIK----------------------
-----DYESEE---------------------------------------------------------------------
-------GKGVGSISNSSSSA------VEEL-------------------------------------------------
----------YGSEEEDEFL-----------------------------EQNGLKGKKKK-NIPSKIFGFSMIAPPN---
---NNNHNDDNL----------------SSE-S------------EP------------------PVTRQ----------
----FFPV------------------------------------------------------------------------
------------------------------------------DESEI--------------------GSGN-----FNDR
SCRFPRAHWAGV--------------------------------------------------------------------
-------------KFYQPEPS-------ANS-------------------------------------------------
----------------PALLGKGS---------------ELSQQ------------------------------------
-VQPMKKS------------------RRGPRSRSSQYRGVT--------FYRRTGRWESHIWDC-----------GKQVY
LGGFDTAHAAARAYDRAAIKFRGMEADINFNLEDYEEDLKQMKNLTKEEFVHVLRRQSTGFPRGSSKYRGVT--LHKCGR
WEARMGQLLGKKYVYLGLFDTENEAARAYDKAAIKCNGKDAVTNFDPCIY-----ENELNSSE-----------------
---------------------------------------CSNKAADHSLDLSLGS-SSSKQNSREME-DTNK--------
--------------------NQNYPSI---------------------------------------QFDVDWRHQGSK--
----------------PKQPSPLDMEYGRR--RNVYNETETLQL--FSQTHLHSP-------GSFKTNSN----------
---------------------------------------------------------------EM---------------
-------------------------QRFGQYMRAGDS--------------------------QMIP------PQFTS-S
NYQVQFPSSSNR------------------RD----------------------------------TQQWQSNTV-----
--------------------------------------------------------------------------------
----------------------PPPH------------------------------------------------LFATAA
ASSGFPQ----QILRHQN--------------WPHK-SGFN-----------------------------YSLTRPSN--
--------------------------------------------------------------------------------
--------------
>Solyc02g093150.2_Sly
-----------------MVGLG----------------------------------------------------------
--------------------------------------------------------------------------------
--------------------------------------------------------------------------------
----------NGDEEQ----------------------------------------------------------------
-----------------------------------------------------------------PVTRQ----------
----FFPV------------------------------------------------------------------------
------------------------------------------DESEM--------------------GGVA-----AENG
CPNFPRAHWVGV--------------------------------------------------------------------
-------------KFYQTETL-------GNT-------------------------------------------------
-----------------GLARPVD---------------MVQQQ------------------------------------
-QQPIKKS------------------RRGPRSRSSQYRGVT--------FYRRTGRWESHIWDC-----------GKQVY
LGGFDTAHAAARAYDRAAIKFRGVEADINFSLEDYESDLKQMTSLTKEEFVHVLRRQSTGFPRGSSKYRGVT--LHKCGR
WEARMGQFLGKKYVYLGLFDTEIEAARAYDKAAIKCNGKDAVTNFDPSIY-----ENELNSIE-----------------
---------------------------------------STDNVADHNLDLSLGG-SSSKQGSQELG-D-NR--------
--------------------GQNSSSIM--------------------------------------QLDIDWQRHGLR--
----------------PEKQSAL-IDARRR--ENRYNETETLQL--LSQTHLHSP-------ASLKHNNNN---------
-------------------------------------------------------------NSQV---------------
-------------------------QRFGQFMRPGDQSHMI----------------------QMFP------QQFGS-S
NYQIQFPSGSNGGRIGA----------TNVRDLSLAATS-------------------------NGSSQWQSNF------
--------------------------------------------------------------------------------
-----------------------PPQ------------------------------------------------IFVAAA
ASSGFPQ----QIVRPQN--------------WSSE-NGFH-----------------------------HSLMRPS---
--------------------------------------------------------------------------------
--------------
>Solyc03g044300.2_Sly
-----------------MWNLN-----------------------------DSPDQTM----------------------
-----EYESDE---------------------------------------------------------------------
-------GITVRSESNSISSAL---LVVEDG-------------------------------------------------
----------NSSEED------------------------------------GEKGKKKKNNTPGKIFGFSI--------
-------KDHNL----------------ES----------------P------------------VVTRQ----------
----FFPV------------------------------------------------------------------------
------------------------------------------D-----------------------------------NE
STNFPRAQWAGI--------------------------------------------------------------------
-------------KFCESEPP-------LVN-------------------------------------------------
-----------------GLVGNKI---------------DVLQQ------------------------------------
--QPIKKS------------------RRGPRSRSSQYRGVT--------FYRRTGRWESHIWDC-----------GKQVY
LGGFDTAHAAARAYDRAAIKFRGAEADINFTSKDYEDDLKQMSNLTKEEFVHVLRRQSTGFPRGSSKYRGVT--LHKCGR
WEARMGQFLGKKYVYLGLFDTEVEAARAYDKAAIKCNGKDAVTNFDRSIY-----ENELNSTE-----------------
---------------------------------------CTDNATDHNLDLSLGG------SSQEMG-D-NR--------
--------------------GQNSSSNL--------------------------------------QLDGHWGHQ-----
--------------------------------------------------------------GSSRHNNK----------
--------------------------------------------------------------------------------
--------------------------------------------------------------------------------
---VQTPSSNNVGQIG-------------------------------------------------GTSNFQNNYE-----
--------------------------------------------------------------------------------
--------------------------------------------------------------------------IIATAA
ASSGFPQ----QIIRTQN-------------------NGFH-----------------------------HYFMRP----
--------------------------------------------------------------------------------
--------------
>scaffold00035.43_Atr
-----------------MWDLN-----------------------------DSPEERRGGA------------------L
VGDSGSFEGEDDDKGK----------------------------------------------------------------
------GGSASNEDDNSNSSSA---IVFE---------------------------------------------------
-----------GSDAE--------------------------------------SGKKDK-SGGNRIFGFSVL-------
----QQQQDSNC----------------SSESS------------EPEN-----SNNNN---NTNVVTRQ----------
----FFPIIGGGE-------------------------------------------------------------------
---------------------------------------KEGDSDQLSL--QVR------------DGSG--------SG
SLPLPRAHWVGV--------------------------------------------------------------------
-------------KFCQSE-------------------------------------------------------------
-----------------RLKG-------------------MEVS------------------------------------
-SQPIKKS------------------RRGPRSRSSQYRGVT--------FYRRTGRWESHIWDC-----------GKQVY
LGGFDTAHAAARAYDRAAIKFRGVDADINFSLDDYEEDLKQMNNLTKEEFVHVLRRQSTGFPRGSSKFRGVT--LHKCGR
WEARMGQFLGKKYVYLGLFDSEVEAARAYDKAAIKCNGREAVTNFDPSIY-----DNEIAATAGR---------------
------------------------------------GGGGRGDEADHNLDLSLGSNSSKRESFESLGADEERLG------
-----L--------GFGGVDPSSSSSILIQPSSF-------------------------------HQSFFDWRTTNPR--
----------------NVKPKQFDEKFKSP--EDQRSGVGVEQMC-FSSSGHASPSFP-PAYAHLRRRSE----------
--------------------------------------------------------------VPL---------------
-------------------------LHF-----------------------------------HPAP------LPLHG-V
PYHIQQYQSDGE-RLG-----------------RLSLVI-------------------------QGEQQQQVNNNNN---
----------------------------------KSLGGISI--------------------------------------
-----------------TNGWPAPAQ------------------------------------------------IFATAA
ASSGFPP----QIIHQQRQQL--PPPPPSQPSWMHK-NGF------------------------------HSLMRTT---
--------------------------------------------------------------------------------
--------------
>MA_2193g0020_Pab
---------------------------------------------------MTPGRRI----------------------
------LRSDIISSDN----------------------------------------------------------------
------KPTSNQDDSGTSNSSVVNTVAVENG---------------------------------------CP--------
------DFEASSTCSN----------------------------------MNSHSLKAAK-------FLESVG-------
---------SDI----------------ARAAH------------PPGNMMFLANENSG---GNDCVTRQ----------
----FFPVEVPE--------------------------------------------------------------------
-----------------------------------------------------------------------------KPP
PDTLTRSRWTDV--------------------------------------------------------------------
-------------TFCDSPDP-------SEH-------------------------------------------------
------------------------------------------QKA--------------------------------VAE
TTQPTKKS------------------RRGPRSRSSQYRGVT--------FYRRTGRWESHIWDC-----------GKQVY
LGGFDTAHAAARAYDRAAIKFRGAEADINFNHSDYEEDMKQMNNLSKEEFVHILRRQSTGFSRGSSKFRGVT--RHKCGR
WEARMGQFLGKKYIYLGLFDSEIDAARAYDRAAIRCNGAGAVTNFEPGLY-----QDELIAEGEN---------------
------------------------------------GG------DDHNLDLSLGM-SAPTYSTVPL--DEHKRT------
--------------------QFKSNKAESA--NY--------------------------------SEVPDWKKTRLL--
----------------NTRTEDCN--------------IQQTQLG---QLFNVSPSSTGEKILSFQQLSNAEGGNNFTFL
QPQ----------------HQV---------------------------KCAISDKGDRQELINI---------------
-------------------------TEYNSVR-------------------------------HSRP----------S-E
DKTVNLFSEQAPGWSG-----------IHSRS-ILNRNV-----------------------PNNGNYDLQHDRNRR---
----------------------------------ADGSIVS---------LLPPEKTPG------------WAWQLQ---
-----------------AAATSLPAA------------------------------------------------PVFASA
ASSGFSP----QIISAAV---------PS-HDWLQK-AGF------------------------------HYVDQSI---
------------GRTSFTEKPKVAFQEDIPLGIDHLLSLSSGSTTTKFKAL---GLSRETK-------------------
--------------
>PITA_000008305_Pta
--------------MELMLDLNAVDTV--------------------EVSSPEPGSVC----------------------
--SDDAMRSDIISSDN----------------------------------------------------------------
------KPMSNQDDSGTSNSSVVNTVVVENG---------------------------------------CP--------
------DFEASSTCSN----------------------------------MNSHSLKAAK-------FLGSLG-------
---------SEI----------------DRAAP------------PPGNLIFLANENPV---GNDCVTRQ----------
----FFPVEVPE--------------------------------------------------------------------
-----------------------------------------------------------------------------KPP
PDTLTRSRWTDV--------------------------------------------------------------------
-------------TFCDSPDP-------AEH-------------------------------------------------
------------------------------------------QKA--------------------------------MAE
GTQPAKKS------------------RRGPRSRSSQYRGVT--------FYRRTGRWESHIWDC-----------GKQVY
LGGFDTANAAARAYDRAAIKFRGAEADINFNYSDYEEDMKQMNNLSKEEFVHILRRQSTGFSRGSSKFRGVT--RHKCGR
WEARMGQFLGKKYIYLGLFDSEIEAARAYDRAAIRCNGAGAVTNFEPALY-----QDELIAEGENV--------------
------------------------------------KG------DDHNLDLRLGM-PPPTYSTVPS--DEQKIT------
--------------------QLKSNKLEST--NF--------------------------------SEVPDWKKNRLL--
----------------NTRPEECN--------------IQQTQLG---QLFNVPPSSTGEKILSFQQLSNAEGGNNFTFL
QPQ----------------RQV---------------------------KSLVSDKGDRQDLTNV---------------
-------------------------MEYNSVR-------------------------------HSRP----------S-E
DRTVNLFSGQAPGWSG-----------MHSRS-ILNQNV-----------------------PSNGNDDLQRDRNRC---
----------------------------------ADSSILS---------LPHTEKTPG------------WAWKIQ---
-----------------AASTSLPAA------------------------------------------------PVFASA
ASSGFSP----QIFSAAV---------PSPHDWLQK-AGS------------------------------HYVDQSN---
------------GRIGFTEKPKVAFQEDIPLGIDHLLSLSSGPTTTKFKGL---GLSRDK--------------------
--------------
>MA_130948g0020_Pab
-M--S--TCEAPAEISTEWDLNLTPAVPD--------------EYVLAVNCTNPNFLREPH--------------EVNAL
--SSKAEESGSVCDETS----------INPAITVA--------------KSELEPWTSGTGELSFI--------------
-----RRAENCRDDSGTSNSSVVNAPVIDNRIKN-----------------------------DGSLYLECEDSA-----
----NQAIESPSRSND----------------------------------IN--NLGQSK-TVSSKLFGCLMTV------
----NALAGSEM----------------NTHSQ------------GQPDT---------------CITHQ----------
----FSVVN-----------------------------------------------------------------------
---------------------------------------RALDSVSSPPLEEI------------------------RGP
VNQFSRSLWGD---------------------------------------------------------------------
--------------------------------------------------------------------------------
-----------------HLVSSQT---------------DSSGTPN------------------------------PPTV
PIQAVKKS------------------RRGPRSRSSQYRGVT--------FYRRTGRWESHIWDC-----------GKQVY
LGGFDTAHAAARAYDRAAIKFRGQDADINFNLSDYEEDLKQLNNLTKEEFVHILRRQSNGFSRGSSKYRGVT--LHKCGR
WEARMGQFLGKKYIYLGLFDNEIEAARAYDQAAIKCNGREAVTNFDPSVY-----QNKLLTEGNS---------------
------------------------------------SS------FDQNLDLSLGI-SAPTVLDTSVSGDNKIGG------
-----L--------------KVKTSTDI--------------------------------------VVEPDWKKARCA--
----------------ISTPEDG---------------SQQTQL--------EAP-------FPYGQLGQ----------
-------------------------------------------------------------YVGL---------------
-------------------------QNRETFFSQG----------------------------KQTP------FTF-L-P
QYQIHQPNSEKIQVKGNLT-YNPLRLLPNPKDDSIHLALEQQGLWSRV-----------CPLSFPNYKLYSPTGGLQGQG
------------------------------------GSGLS------PLLSSSIEHQPG------------WPWKCY---
-----------------TNGSS----------------------------------------------------ASMLAA
ASSGFSP----QAQTTLA--------HPS--DWMHKLQGFQYPSGQS--------------------MG-TQLSAPKPSS
QRQNLHSTDAS--------------------SSGQVLGLSLSISTKSIAEP---CSSKDNDGSKFLK-------------
--------------
>PITA_000055660_Pta
-M--S--SCEAPAEISSKWDLNLTPAAPD--------------EYVLAV---NPNFLRLPQ--------------EVKAI
--SSKAEESGSVCDETS----------INPAVAVA--------------KPELETWTSGTVEVSFI--------------
-----RKAENCRDDSGTSNSSVVNAPPINNTRKN-----------------------------DGSLSLECEDSA-----
----NQVIESRSRSSN---------------------------------DIN--NLGQSK-TVSSKLFGCFMTV------
----NAPAASEI----------------NTDSK------------SQQDT---------------RITHQ----------
----FSVVN-----------------------------------------------------------------------
---------------------------------------RAPDSASSLPLEEI------------------------RGP
VNQFSRSLWSD---------------------------------------------------------------------
--------------------------------------------------------------------------------
-----------------HLASSQT---------------DSSGTPN------------------------------PPTV
LIQPVKKS------------------RRGPRSRSSQYRGVT--------FYRRTGRWESHIWDC-----------GKQVY
LGGFDTAHAAARAYDRAAIKFRGQDADINFNLSDYEDDLKQLNNLTKEEFVHILRRQSNGFSRGSSKYRGVT--LHKCGR
WEARMGQFLGKKDIYLGLFDNEIEAARAYDQAAIRCNGREAVTNFDPSVY-----QNDLLTEGNT---------------
------------------------------------AS------IDQNLDLSLRI-SAPTVPDATVSRDNKIGG------
-----S--------------KVKTSTNI--------------------------------------VVEPDWKKARCA--
----------------ISTPEDA---------------SQQTQL--------EAP-------FSYGQLGP----------
-------------------------------------------------------------YTGL---------------
-------------------------QDRETFSSQG----------------------------KQTP------ITF-L-P
RYQVHHPNSEKIQVNGTLN-HNPMRLLPNPKDDSIYLTLEQQGLWSRV-----------CPPSFANYKLYSPNGGLQGQG
------------------------------------GSGLS------SPLSSSIEHQSS------------WPWKLY---
-----------------TNGSS----------------------------------------------------ASMLAA
ASSGFSP----QAQITVA--------HPS--DWLHKLQGAQS-------------------------MGTTQLSAPKSAS
QRQNLHSIQAS--------------------LSGQVLGLGLNLSTKSKAEL---CSSKDTVGSKSLKGVV--GDGRSFG-
--------------
>MA_10434312g0010_Pab
-----------------MMTVD---------------------------SSIEPVGKIVPR-------------------
----SSEETESVCVEAA-----------TATVTHI--------------QSNNETRRRA---------------------
------PFRSEMTESGTSISSVVNSIACNENINS----------------------------------------------
-----LEHEASSKAVELDGD-----------------------------VLSSNSTQVPRNEGNHKIFGFSLKIETQ---
----NLTSRGNLL---------VKA--NDEQQK------------DPA-----------------CVTRH----------
----FFPLHNGQ--------------------------------------------------------------------
------------------------------------------PSEVLMPTE--------------------------CTG
GNPFTESHWTTV--------------------------------------------------------------------
-------------TS-----------------------------------------------------------------
-----------------RLPESTE---------------PRKKQ----------------------------------AE
NNKPIKKS------------------RRGPRSRSSQYRGVT--------FYRRTGRWESHIWDC-----------GKQVY
LGGFDTAHAAARAYDRAAIKFRGVDADINFTLTDYQEDLDQ---------------------------------------
--------------------------------------------------------------------------------
--------------------------------------------------------------------------------
--------------------------------------------------------------------------------
--------------------------------------------------------------------------------
--------------------------------------------------------------------------------
--------------------------------------------------------------------------------
--------------------------------------------------------------------------------
--------------------------------------------------------------------------------
--------------------------------------------------------------------------------
--------------------------------------------------------------------------------
--------------------------------------------------------------------------------
--------------
>Cre16.g667900.t1.1_Cre
-----------------MEPPASQGQPGRGSPRSIMAPSVVPS---MGLQLTLPAHSEAATQ----------------QD
TQLASSAGGSQGAPATPFATATGGGLH----FTSLNQAQQQQQQPRSAHQQTAAPATPTASATHQQ-----------QQQ
QTMAAAAQAEAAAAGGADTRSLVVHQHPNQHPHQQHQQHQQHPHPQVTSEPVWGTQGPSFG--GGG--------------
----GSAGGAGGSEGDASDPGFASW-----------------------RFGGSGGGAAPSGPNNLDFAFNSGRQTPQLYQ
PQPHPQQQAQPYHQPAATRYASLGSAGGDTAMD---VDSM-----GPAGGG--PGGGGGQAEDMSGVSHPPQAHQQRAGG
GAAAAAPPPPANWLAESAAGVTQQ------------------------QTQTQHPYHDLPYPQHPQHPQHA---------
-------PSHGALQ-----HNHHTHTHPFHGSAPSPVHFLAVGSPPPPPPP---------RGAAAAGGGGG--GRGPPGA
PTTFRPAAYAHSSGGS----MPSNGQHAP----------HPYPHQHQMPHPHGGVYEYTHHHH-------TAPHYHQHHH
QHQPNALVQYQPLQQGRASYPGGGVSRPGSPNGSTQSAASNLVGG---------GGSGERQRRPLAELHSDIHPQQHHQQ
QHQQQHQISVPSGAVAAAAAAGAA--------------PSRRRRRSGAGDYDGDPDPDDAVVLYGGPGAGRAGEEDYEEE
EDYEEQDDVND----EDYNGGGGGRGGGGRRPRTSAYRGVT--------KHRWTGKWEAHLWDSSVARKKTSRSRGKQVY
LGGYLTELDAAEAYDMAALVYWGEAATLNFPKEHYDCRRAELSTLDKDGVVALLRRRSTAAGRGASAYRGVT-RHNLAER
WEARI-HLGANQYLLLGEFTEETAAAAAYDYAALRRRGHRALTNFNPATYLD-PDSVDRLQPATREGLSLNSLQ--LD--
EDLRRQEEQQQQQQQQGRKAAAE---------VAANAEAANAEGGAERMDAAADRDADPDADPNPDPEEP----------
------NHLYEQVMKQLAEEGRQRQEAVVAAAAA----------------AAAAGAAAAPPAAVPAAAPAAASGR---GG
ETAVALGRRAPPLGMTRAVSAPGEVVWTTAAG-GVGAGDNGSGGGLPPRLRKH---------HKQDQQQQQQLLPGVAAV
RPVTSTAITFTGLTPD-----VVA----------AVTSGGSAGDGGSHARSTRSGSAASASAAALEQLLLPHT--PPPLT
SCGAVPGGAPARPSSGMGPGPGGPGGPGSPSRARSVQLASLPAAASAAAAPAAAAP---------GPVF----------G
MAAADDGAGSSERSSNHLL----AAGNSNESGGGGGGSGGGAAAGA--P-------SL--LVAAQRRASYAGGGQTPQPP
PQPQQLQQQQLQAWASAGEQGG---------------GGVS-GG---GGGGSGAGGAGGE-AT-------SWRWGGGGGA
PQQVPLPLPPMPTPGA-GTGASSQQQQHMQPPPQHPLLQPQSPRGLQLLDEEYHLSLLRQNQQQHQQQTQAQQHQQHQPA
GSSDHQSQQ-----EQQNQQQLRGSGGGGSEQQTVVAVGVQQHQHQHQHQ-----------------QLQLPPMPPPQQQ
LLQYQHLQQHQQHQH-----------QHQHQPSAPQLQQQVS------------YAASQGAPGS----------GLLLGE
GATDTDI-DMTEAG
